# Supplementary material for: Profiling of MicroRNAs and Their Targets in Roots and Shoots Reveals a Potential MiRNA-Mediated Interaction Network in Response to Phosphate Deficiency in the Forestry Tree Betula luminifera
Source: Front Genet. 2021 Jan 28;12:552454. doi: 10.3389/fgene.2021.552454 (PMC7876418; doi:10.3389/fgene.2021.552454)
Supplement: Supplementary Table 9 — miRNA targets in roots. [file Table_9.XLSX]

## Sheet: Sheet1
Table S9. miRNA targets in roots.
miRNA name	Sequence	Transcript	Transcript Annotation	GO_Term	KEGG_pathways	KOG_Description	Symbol	AlignmentScore	AlignmentRange	DegradomeDetection	TPB	DegradomeCleavageSite	DegradomeReadNumber_Raw	DegradomeReadNumber_Normalized	DegradomeCategory	Degradome_Pvalue
blu-miR10-3'	TTTGCAAGAATTGGACGGAGG	TRINITY_DN27481_c0_g2	-	-	-	-	-	4	188-207	Y	21.8832	198	2	1	2	0.986004
blu-miR10-3'	TTTGCAAGAATTGGACGGAGG	TRINITY_DN28464_c0_g3	PREDICTED: exocyst complex component SEC5A-like [Juglans regia]	GO:0000145(exocyst);GO:0001927(exocyst assembly)	-	-	SEC5A	3	41-60	Y	43.7663	52	2	2	2	0.91279
blu-miR12-3'	TATGGAGTCTCTCATATTGCC	TRINITY_DN21501_c0_g1	hypothetical protein ARALYDRAFT_330235 [Arabidopsis lyrata subsp. lyrata]	-	-	-	-	3.5	146-166	Y	21.8832	157	1	1	4	0.673725
blu-miR12-3'	TATGGAGTCTCTCATATTGCC	TRINITY_DN28334_c2_g1	PREDICTED: protein INVOLVED IN DE NOVO 2-like isoform X1 [Juglans regia]	GO:0004526(ribonuclease P activity);GO:0005655(nucleolar ribonuclease P complex);GO:0090502(RNA phosphodiester bond hydrolysis, endonucleolytic)	ko03010(Ribosome)	-	IDN2	4	1437-1457	Y	284.481	1448	13	13	2	0.612744
blu-miR3-3'	AATGATAATTTTAAAAGCCACATC	TRINITY_DN13351_c0_g1	-	-	-	-	-	2	29-52	Y	7.29439	43	1	0.333333	4	0.954043
blu-miR36-5''	ATTGATGTGGCTTTTAAAATTACC	TRINITY_DN24063_c1_g3	-	-	-	-	-	3.5	522-545	Y	10.9416	536	1	0.5	4	0.893545
blu-miR36-5'	ATTGATGTGGCTTTTAAAATTACC	TRINITY_DN28973_c1_g1	-	-	-	-	-	3.5	19-42	Y	10.9416	33	1	0.5	4	0.893545
blu-miR40-5'	AGAAAAGAAAAGGGAAGGATT	TRINITY_DN23146_c3_g1	PREDICTED: zinc finger protein CONSTANS-LIKE 9-like [Jatropha curcas]	GO:0003700(transcription factor activity, sequence-specific DNA binding);GO:0005634(nucleus);GO:0006355(regulation of transcription, DNA-templated);GO:0007623(circadian rhythm);GO:0008270(zinc ion binding);GO:0048579(negative regulation of long-day photoperiodism, flowering)	ko04712(Circadian rhythm - plant)	-	COL9	3.5	1203-1224	Y	43.7663	1215	2	2	2	0.999999
blu-miR40-5'	AGAAAAGAAAAGGGAAGGATT	TRINITY_DN23871_c0_g5	hypothetical protein L484_015979 [Morus notabilis]	-	-	-	-	4	32-53	Y	21.8832	43	1	1	4	1
blu-miR40-5'	AGAAAAGAAAAGGGAAGGATT	TRINITY_DN24170_c5_g5	-	-	-	-	-	4	13-34	Y	65.6495	24	3	3	3	0.987266
blu-miR40-5'	AGAAAAGAAAAGGGAAGGATT	TRINITY_DN25441_c2_g3	PREDICTED: uncharacterized protein LOC109011000 [Juglans regia]	-	-	-	-	2	626-646	Y	462.89	637	36	21.1528	2	0.893131
blu-miR40-5'	AGAAAAGAAAAGGGAAGGATT	TRINITY_DN25037_c1_g1	PREDICTED: E3 ubiquitin-protein ligase MIEL1-like isoform X1 [Malus domestica]	GO:0005634(nucleus);GO:0008270(zinc ion binding);GO:1902456(regulation of stomatal opening)	ko04120(Ubiquitin mediated proteolysis)	-	MIEL1	4	743-763	Y	21.8832	754	1	1	4	1
blu-miR40-5'	AGAAAAGAAAAGGGAAGGATT	TRINITY_DN26100_c1_g1	-	-	-	-	-	3.5	16-37	Y	21.8832	28	1	1	4	1
blu-miR40-5'	AGAAAAGAAAAGGGAAGGATT	TRINITY_DN26246_c2_g6	-	-	-	-	-	4	386-407	Y	65.6495	398	3	3	2	1
blu-miR40-5'	AGAAAAGAAAAGGGAAGGATT	TRINITY_DN29286_c0_g3	sucrose synthase 1 [Betula luminifera]	GO:0005982(starch metabolic process);GO:0005985(sucrose metabolic process);GO:0005986(sucrose biosynthetic process);GO:0008194(UDP-glycosyltransferase activity);GO:0009414(response to water deprivation);GO:0009507(chloroplast);GO:0010431(seed maturation);GO:0010555(response to mannitol);GO:0016157(sucrose synthase activity);GO:0016757(transferase activity, transferring glycosyl groups)	ko00500(Starch and sucrose metabolism)	-	SUS2	3.5	2772-2791	Y	87.5327	2782	4	4	2	0.999999
blu-miR40-5'	AGAAAAGAAAAGGGAAGGATT	TRINITY_DN29288_c2_g1	-	-	-	-	-	4	239-259	Y	84.7973	250	17	3.875	2	1
miR1510	TTGTTTTACCTATTCCACCCGT	TRINITY_DN23109_c1_g1	NBS-containing resistance-like protein, partial [Corylus avellana]	GO:0005524(ATP binding);GO:0006952(defense response);GO:0043531(ADP binding)	ko04626(Plant-pathogen interaction)	-	RPP13L3	2.5	11-32	Y	21.8832	23	2	1	2	0.86904
miR1510	TTGTTTTACCTATTCCACCCGT	TRINITY_DN24181_c0_g10	hypothetical protein PRUPE_ppa022914mg, partial [Prunus persica]	GO:0005524(ATP binding);GO:0005634(nucleus);GO:0006952(defense response);GO:0007165(signal transduction);GO:0043531(ADP binding)	ko00500(Starch and sucrose metabolism)	-	At4g11170	4	106-127	Y	10.9416	118	1	0.5	4	0.992554
miR1510	TTGTTTTACCTATTCCACCCGT	TRINITY_DN24649_c5_g1	PREDICTED: TMV resistance protein N-like [Juglans regia]	GO:0005524(ATP binding);GO:0005737(cytoplasm);GO:0006952(defense response);GO:0043531(ADP binding)	ko03040(Spliceosome);ko04141(Protein processing in endoplasmic reticulum);ko04144(Endocytosis)	-	-	4	20-41	Y	3.12617	32	1	0.142857	4	0.992554
miR1510	TTGTTTTACCTATTCCACCCGT	TRINITY_DN24649_c8_g4	PREDICTED: TMV resistance protein N-like [Juglans regia]	GO:0005524(ATP binding);GO:0005737(cytoplasm);GO:0006952(defense response);GO:0007165(signal transduction);GO:0043531(ADP binding)	ko00500(Starch and sucrose metabolism)	-	RLM1A	4	210-231	Y	3.12617	222	1	0.142857	4	0.992554
miR1511b	ACCCAGGCTCTGATACCATGA	TRINITY_DN23312_c1_g2	PREDICTED: splicing factor U2AF-associated protein 2 [Juglans regia]	GO:0000398(mRNA splicing, via spliceosome);GO:0003723(RNA binding);GO:0005684(U2-type spliceosomal complex);GO:0005686(U2 snRNP)	ko03040(Spliceosome)	-	HTATSF1	3.5	560-580	Y	21.8832	571	1	1	4	0.428795
miR156f	ATGACAGAAGATAGAGAGCAC	TRINITY_DN19064_c0_g1	PREDICTED: squamosa promoter-binding-like protein 9 isoform X1 [Juglans regia]	-	-	-	SPL14	3	395-415	Y	21.8832	406	1	1	4	0.848932
miR156j-3'	GCTCTCTATGCTTCTGTCATC	TRINITY_DN29241_c1_g1	PREDICTED: putative clathrin assembly protein At2g01600 isoform X2 [Juglans regia]	GO:0005545(1-phosphatidylinositol binding);GO:0005794(Golgi apparatus);GO:0005886(plasma membrane);GO:0005905(clathrin-coated pit);GO:0006897(endocytosis);GO:0016020(membrane);GO:0030136(clathrin-coated vesicle);GO:0030276(clathrin binding);GO:0048268(clathrin coat assembly)	ko01210(2-Oxocarboxylic acid metabolism);ko01230(Biosynthesis of amino acids);ko00290(Valine, leucine and isoleucine biosynthesis);ko00770(Pantothenate and CoA biosynthesis)	-	At2g01600	4	1565-1584	Y	109.416	1575	5	5	2	0.941924
miR160c	TGCCTGGCTCCCTGAATGCCA	TRINITY_DN25985_c2_g1	PREDICTED: auxin response factor 18-like [Juglans regia]	GO:0003677(DNA binding);GO:0003700(transcription factor activity, sequence-specific DNA binding);GO:0005634(nucleus);GO:0006351(transcription, DNA-templated);GO:0006355(regulation of transcription, DNA-templated);GO:0007389(pattern specification process);GO:0009734(auxin-activated signaling pathway);GO:0009738(abscisic acid-activated signaling pathway);GO:0009743(response to carbohydrate);GO:0010…	ko04075(Plant hormone signal transduction)	-	ARF18	2	532-552	Y	339.189	543	31	15.5	2	0.7748
miR160c	TGCCTGGCTCCCTGAATGCCA	TRINITY_DN25985_c2_g3	PREDICTED: auxin response factor 18 isoform X1 [Vitis vinifera]	GO:0003677(DNA binding);GO:0003700(transcription factor activity, sequence-specific DNA binding);GO:0005634(nucleus);GO:0006351(transcription, DNA-templated);GO:0006355(regulation of transcription, DNA-templated);GO:0007389(pattern specification process);GO:0009733(response to auxin);GO:0009734(auxin-activated signaling pathway);GO:0035198(miRNA binding);GO:0048829(root cap development);GO:005130…	ko04075(Plant hormone signal transduction)	-	ARF18	2	635-655	Y	339.189	646	31	15.5	0	0.0199202
miR160c	TGCCTGGCTCCCTGAATGCCA	TRINITY_DN29351_c0_g1	PREDICTED: auxin response factor 17-like isoform X1 [Juglans regia]	-	-	-	-	1	36-56	Y	109.416	47	5	5	2	0.585593
miR164a	TGGAGAAGCAGGGCACGTGCA	TRINITY_DN27509_c1_g2	NAC domain-containing protein 21/22 [Cajanus cajan]	GO:0003677(DNA binding);GO:0003700(transcription factor activity, sequence-specific DNA binding);GO:0005634(nucleus);GO:0006351(transcription, DNA-templated);GO:0006355(regulation of transcription, DNA-templated);GO:0007275(multicellular organism development);GO:0009734(auxin-activated signaling pathway);GO:0010072(primary shoot apical meristem specification);GO:0048527(lateral root development)	ko03018(RNA degradation)	-	NAC021	2	694-714	Y	503.313	705	46	23	0	0.0100102
miR166f-5'	GGAATGCTGTCTGGTTCGAGA	TRINITY_DN25551_c2_g5	PREDICTED: uncharacterized protein LOC109001953 [Juglans regia]	GO:0003674(molecular_function);GO:0008150(biological_process);GO:0009507(chloroplast);GO:0009535(chloroplast thylakoid membrane);GO:0016021(integral component of membrane)	-	-	-	3.5	638-659	Y	21.8832	650	1	1	4	0.428795
miR169b	TGAGCCAAGAATGACTTGCC	TRINITY_DN23675_c2_g2	PREDICTED: nuclear transcription factor Y subunit A-1-like isoform X1 [Juglans regia]	-	-	-	-	2	208-227	Y	43.7663	218	2	2	2	0.525447
miR169b	TGAGCCAAGAATGACTTGCC	TRINITY_DN24688_c1_g2	PREDICTED: nuclear transcription factor Y subunit A-10-like isoform X1 [Juglans regia]	GO:0003677(DNA binding);GO:0003700(transcription factor activity, sequence-specific DNA binding);GO:0005634(nucleus);GO:0006351(transcription, DNA-templated);GO:0006355(regulation of transcription, DNA-templated);GO:0009567(double fertilization forming a zygote and endosperm);GO:0016602(CCAAT-binding factor complex)	ko00970(Aminoacyl-tRNA biosynthesis)	-	NFYA2	1	965-984	Y	21.8832	975	1	1	4	0.597481
miR169b	TGAGCCAAGAATGACTTGCC	TRINITY_DN26121_c0_g1	PREDICTED: uncharacterized protein LOC109003207 isoform X2 [Juglans regia]	GO:0003674(molecular_function);GO:0005739(mitochondrion);GO:0008150(biological_process);GO:0016021(integral component of membrane);GO:0031307(integral component of mitochondrial outer membrane)	-	-	-	3.5	243-261	Y	240.715	252	11	11	2	0.661825
miR169c	TGAGCCAAGAATGACTTGCCGAC	TRINITY_DN23675_c2_g2	PREDICTED: nuclear transcription factor Y subunit A-1-like isoform X1 [Juglans regia]	-	-	-	-	4	204-227	Y	43.7663	218	2	2	2	0.377701
miR169c	TGAGCCAAGAATGACTTGCCGAC	TRINITY_DN24688_c1_g2	PREDICTED: nuclear transcription factor Y subunit A-10-like isoform X1 [Juglans regia]	GO:0003677(DNA binding);GO:0003700(transcription factor activity, sequence-specific DNA binding);GO:0005634(nucleus);GO:0006351(transcription, DNA-templated);GO:0006355(regulation of transcription, DNA-templated);GO:0009567(double fertilization forming a zygote and endosperm);GO:0016602(CCAAT-binding factor complex)	ko00970(Aminoacyl-tRNA biosynthesis)	-	NFYA2	3	962-984	Y	21.8832	975	1	1	4	0.467413
miR171b	TTTGTTGAGCCGCGCCAA	TRINITY_DN25700_c1_g4	hypothetical protein PRUPE_ppa019132mg [Prunus persica]	GO:0003674(molecular_function);GO:0005634(nucleus);GO:0008150(biological_process);GO:0009507(chloroplast)	-	-	-	3.5	661-677	Y	21.8832	668	1	1	4	0.893545
miR171e	TTGAGCCGTGCCAATATCACA	TRINITY_DN23930_c0_g1	PREDICTED: long-chain-alcohol oxidase FAO2 [Juglans regia]	GO:0046577(long-chain-alcohol oxidase activity)	-	-	FAO2	4	453-472	Y	21.8832	464	1	1	4	0.387378
miR171e	TTGAGCCGTGCCAATATCACA	TRINITY_DN28131_c2_g4	PREDICTED: scarecrow-like protein 22 [Malus domestica]	GO:0003700(transcription factor activity, sequence-specific DNA binding);GO:0005634(nucleus);GO:0006355(regulation of transcription, DNA-templated);GO:0010492(maintenance of shoot apical meristem identity);GO:0043565(sequence-specific DNA binding);GO:0048768(root hair cell tip growth);GO:0051301(cell division)	-	-	SCL6	3	156-176	Y	1312.99	167	60	60	0	0.0163281
miR171e	TTGAGCCGTGCCAATATCACA	TRINITY_DN28131_c2_g2	PREDICTED: scarecrow-like protein 27 [Juglans regia]	GO:0003700(transcription factor activity, sequence-specific DNA binding);GO:0005634(nucleus);GO:0006355(regulation of transcription, DNA-templated);GO:0010492(maintenance of shoot apical meristem identity);GO:0043565(sequence-specific DNA binding);GO:0048768(root hair cell tip growth);GO:0051301(cell division)	ko04075(Plant hormone signal transduction)	-	SCL6	3	1140-1160	Y	2341.5	1151	107	107	0	0.0163281
miR172e-5'	GCAGCATCATCAAGATTCACA	TRINITY_DN24565_c2_g2	PREDICTED: protein STRICTOSIDINE SYNTHASE-LIKE 3-like [Juglans regia]	GO:0005774(vacuolar membrane);GO:0005783(endoplasmic reticulum);GO:0016788(hydrolase activity, acting on ester bonds)	ko03050(Proteasome)	-	SSL3	3	826-846	Y	65.6495	837	3	3	2	0.952608
miR172e-5'	GCAGCATCATCAAGATTCACA	TRINITY_DN24670_c1_g2	PREDICTED: uncharacterized protein At1g32220, chloroplastic-like [Juglans regia]	GO:0003954(NADH dehydrogenase activity);GO:1901006(ubiquinone-6 biosynthetic process)	ko00600(Sphingolipid metabolism)	-	At1g32220	3.5	817-837	Y	21.8832	828	1	1	4	0.965266
miR172e-5'	GCAGCATCATCAAGATTCACA	TRINITY_DN26106_c2_g2	PREDICTED: ADP-ribosylation factor 1 [Prunus mume]	GO:0005515(protein binding);GO:0005525(GTP binding);GO:0005794(Golgi apparatus);GO:0005795(Golgi stack);GO:0005886(plasma membrane);GO:0007264(small GTPase mediated signal transduction);GO:0015031(protein transport);GO:0016020(membrane);GO:0016192(vesicle-mediated transport);GO:0046686(response to cadmium ion)	ko04144(Endocytosis)	-	ARF1	3	890-909	Y	43.7663	900	2	2	2	0.952608
miR172e-5'	GCAGCATCATCAAGATTCACA	TRINITY_DN25873_c0_g1	PREDICTED: uncharacterized protein LOC109006280 [Juglans regia]	GO:0003674(molecular_function);GO:0005634(nucleus);GO:0008150(biological_process)	-	-	-	4	550-571	Y	21.8832	562	1	1	4	0.998288
miR172e-5'	GCAGCATCATCAAGATTCACA	TRINITY_DN27324_c1_g1	PREDICTED: uncharacterized protein LOC108991439 isoform X2 [Juglans regia]	GO:0005634(nucleus);GO:0008568(microtubule-severing ATPase activity);GO:0031122(cytoplasmic microtubule organization)	ko03013(RNA transport)	-	MSP1	4	2895-2915	Y	21.8832	2906	1	1	4	0.998288
miR172e-5'	GCAGCATCATCAAGATTCACA	TRINITY_DN29186_c1_g2	PREDICTED: uncharacterized protein At2g39910 isoform X1 [Juglans regia]	GO:0005634(nucleus);GO:0008150(biological_process)	-	-	At2g39910	4	646-667	Y	43.7663	657	2	2	2	0.997901
miR2111a	TAATCTGCATCCTGAGGTTTA	TRINITY_DN29187_c0_g1	PREDICTED: structural maintenance of chromosomes protein 3 [Juglans regia]	GO:0000775(chromosome, centromeric region);GO:0000785(chromatin);GO:0003682(chromatin binding);GO:0005524(ATP binding);GO:0005634(nucleus);GO:0005737(cytoplasm);GO:0005819(spindle);GO:0006281(DNA repair);GO:0007059(chromosome segregation);GO:0007062(sister chromatid cohesion);GO:0007064(mitotic sister chromatid cohesion);GO:0008278(cohesin complex);GO:0008280(cohesin core heterodimer);GO:0009506(…	ko00053(Ascorbate and aldarate metabolism);ko00480(Glutathione metabolism)	-	SMC3	4	3438-3458	Y	21.8832	3449	1	1	4	0.770079
miR2199	TGATACACTAGCACGGGTCAC	TRINITY_DN25082_c1_g8	PREDICTED: nuclear pore complex protein NUP54-like [Juglans regia]	GO:0005487(nucleocytoplasmic transporter activity);GO:0006607(NLS-bearing protein import into nucleus);GO:0006999(nuclear pore organization);GO:0017056(structural constituent of nuclear pore);GO:0036228(protein targeting to nuclear inner membrane);GO:0044613(nuclear pore central transport channel)	ko03013(RNA transport)	-	NUP54	4	660-680	Y	21.8832	671	1	1	4	0.387378
miR319b-5'	AGAGCTCTCTTCAGTCCATTC	TRINITY_DN28715_c2_g3	Putative mitochondrial protein [Glycine soja]	-	-	-	-	3.5	374-394	Y	262.598	385	12	12	2	0.803342
miR319d-5'	GAGCTTTCTTCAGTCCACTC	TRINITY_DN25415_c5_g1	PREDICTED: oxygen-evolving enhancer protein 2, chloroplastic-like [Ziziphus jujuba]	GO:0005509(calcium ion binding);GO:0008266(poly(U) RNA binding);GO:0009507(chloroplast);GO:0009534(chloroplast thylakoid);GO:0009535(chloroplast thylakoid membrane);GO:0009543(chloroplast thylakoid lumen);GO:0009570(chloroplast stroma);GO:0009579(thylakoid);GO:0009654(photosystem II oxygen evolving complex);GO:0009941(chloroplast envelope);GO:0019684(photosynthesis, light reaction);GO:0019898(ext…	ko00195(Photosynthesis)	-	PSBP	4	602-621	Y	131.299	612	6	6	3	0.618074
miR319d-5'	GAGCTTTCTTCAGTCCACTC	TRINITY_DN29420_c2_g2	PREDICTED: nudix hydrolase 4-like [Juglans regia]	GO:0000210(NAD+ diphosphatase activity);GO:0005829(cytosol);GO:0009507(chloroplast);GO:0016787(hydrolase activity);GO:0046872(metal ion binding);GO:0047631(ADP-ribose diphosphatase activity)	-	-	NUDT4	4	533-551	Y	153.182	542	7	7	3	0.618074
miR394a-3'	AGCTCTGTTGGCTTCTCTTTG	TRINITY_DN23944_c1_g9	PREDICTED: pre-rRNA-processing protein ESF2 [Cucumis sativus]	GO:0000447(endonucleolytic cleavage in ITS1 to separate SSU-rRNA from 5.8S rRNA and LSU-rRNA from tricistronic rRNA transcript (SSU-rRNA, 5.8S rRNA, LSU-rRNA));GO:0000472(endonucleolytic cleavage to generate mature 5'-end of SSU-rRNA from (SSU-rRNA, 5.8S rRNA, LSU-rRNA));GO:0000480(endonucleolytic cleavage in 5'-ETS of tricistronic rRNA transcript (SSU-rRNA, 5.8S rRNA, LSU-rRNA));GO:0003723(RNA b…	-	-	esf2	3.5	258-278	Y	372.014	269	17	17	2	0.661825
miR395b	CTGAAGTGTTTGGGGGAACTC	TRINITY_DN28250_c2_g2	PREDICTED: ATP sulfurylase 1, chloroplastic [Juglans regia]	GO:0000103(sulfate assimilation);GO:0004020(adenylylsulfate kinase activity)	ko00920(Sulfur metabolism);ko00230(Purine metabolism);ko00450(Selenocompound metabolism);ko00261(Monobactam biosynthesis)	-	APS1	2.5	548-568	Y	328.248	559	15	15	2	0.742115
miR395c-5'	GTTCCCTTGACCACTTCT	TRINITY_DN22954_c2_g1	PREDICTED: peroxisomal (S)-2-hydroxy-acid oxidase GLO4-like [Juglans regia]	GO:0005737(cytoplasm);GO:0005777(peroxisome);GO:0008891(glycolate oxidase activity);GO:0009854(oxidative photosynthetic carbon pathway);GO:0010181(FMN binding);GO:0042742(defense response to bacterium);GO:0050665(hydrogen peroxide biosynthetic process);GO:0052852(very-long-chain-(S)-2-hydroxy-acid oxidase activity);GO:0052853(long-chain-(S)-2-hydroxy-long-chain-acid oxidase activity);GO:0052854(m…	ko01200(Carbon metabolism);ko00630(Glyoxylate and dicarboxylate metabolism);ko04146(Peroxisome)	-	GLO4	4	160-176	Y	43.7663	168	2	2	2	0.999924
miR395c-5'	GTTCCCTTGACCACTTCT	TRINITY_DN23625_c1_g1	PREDICTED: protein OBERON 4-like [Juglans regia]	-	-	-	-	4	1029-1046	Y	65.6495	1037	3	3	2	0.999924
miR395c-5'	GTTCCCTTGACCACTTCT	TRINITY_DN24269_c0_g5	PREDICTED: transmembrane 9 superfamily member 8-like [Juglans regia]	GO:0016021(integral component of membrane)	-	-	TMN9	4	274-292	Y	21.8832	283	1	1	4	0.999945
miR395c-5'	GTTCCCTTGACCACTTCT	TRINITY_DN24314_c0_g4	PREDICTED: serine/threonine-protein kinase HT1-like [Juglans regia]	GO:0004674(protein serine/threonine kinase activity);GO:0004712(protein serine/threonine/tyrosine kinase activity);GO:0005524(ATP binding);GO:0006468(protein phosphorylation);GO:0016301(kinase activity)	ko04075(Plant hormone signal transduction)	-	HT1	4	971-989	Y	21.8832	980	1	1	4	0.999945
miR395c-5'	GTTCCCTTGACCACTTCT	TRINITY_DN25424_c1_g3	PREDICTED: protein WVD2-like 3 [Juglans regia]	GO:0003674(molecular_function);GO:0005634(nucleus);GO:0005737(cytoplasm);GO:0005874(microtubule);GO:0008150(biological_process)	-	-	WDL3	4	1427-1444	Y	21.8832	1435	1	1	4	0.999945
miR395c-5'	GTTCCCTTGACCACTTCT	TRINITY_DN25408_c0_g3	PREDICTED: probable calcium-binding protein CML45 [Juglans regia]	GO:0005509(calcium ion binding)	ko04070(Phosphatidylinositol signaling system);ko04626(Plant-pathogen interaction)	-	CML45	4	562-579	Y	87.5327	570	4	4	2	0.999924
miR395c-5'	GTTCCCTTGACCACTTCT	TRINITY_DN26528_c2_g3	PREDICTED: WRKY transcription factor WRKY24-like isoform X1 [Juglans regia]	GO:0003700(transcription factor activity, sequence-specific DNA binding);GO:0005515(protein binding);GO:0005634(nucleus);GO:0006351(transcription, DNA-templated);GO:0006355(regulation of transcription, DNA-templated);GO:0006970(response to osmotic stress);GO:0009408(response to heat);GO:0009409(response to cold);GO:0009414(response to water deprivation);GO:0009651(response to salt stress);GO:0010…	ko04626(Plant-pathogen interaction)	-	WRKY24	2	64-82	Y	109.416	73	5	5	2	0.525447
miR395c-5'	GTTCCCTTGACCACTTCT	TRINITY_DN28600_c1_g1	GTP-binding family protein [Populus trichocarpa]	GO:0003924(GTPase activity);GO:0005525(GTP binding);GO:0005829(cytosol);GO:0005886(plasma membrane);GO:0006886(intracellular protein transport);GO:0006913(nucleocytoplasmic transport);GO:0007264(small GTPase mediated signal transduction);GO:0009506(plasmodesma);GO:0031901(early endosome membrane);GO:0032588(trans-Golgi network membrane);GO:0042546(cell wall biogenesis)	ko04144(Endocytosis)	-	RIC2	4	247-264	Y	153.182	255	7	7	2	0.999924
miR396a-3'	GTTCAATAAAGCTGTGGGAAG	TRINITY_DN27282_c3_g2	PREDICTED: MACPF domain-containing protein CAD1-like [Juglans regia]	GO:0006955(immune response);GO:0008219(cell death);GO:0009626(plant-type hypersensitive response);GO:0010337(regulation of salicylic acid metabolic process)	ko01230(Biosynthesis of amino acids);ko00400(Phenylalanine, tyrosine and tryptophan biosynthesis)	-	CAD1	4	736-755	Y	218.832	746	10	10	2	0.850033
miR396b	TTCCACAGCTTTCTTGAACTTT	TRINITY_DN23779_c1_g2	PREDICTED: growth-regulating factor 7-like [Juglans regia]	GO:0005634(nucleus);GO:0048366(leaf development)	-	-	GRF12	3.5	340-362	Y	656.495	352	30	30	0	0.0217113
miR396b	TTCCACAGCTTTCTTGAACTTT	TRINITY_DN24105_c5_g3	PREDICTED: growth-regulating factor 6-like isoform X2 [Juglans regia]	GO:0005515(protein binding);GO:0005524(ATP binding);GO:0005634(nucleus);GO:0006351(transcription, DNA-templated);GO:0006355(regulation of transcription, DNA-templated);GO:0009624(response to nematode);GO:0048364(root development);GO:0048366(leaf development);GO:0061062(regulation of nematode larval development)	-	-	GRF6	4	114-136	Y	131.299	126	6	6	2	0.941924
miR396b	TTCCACAGCTTTCTTGAACTTT	TRINITY_DN24891_c0_g1	PREDICTED: LOW QUALITY PROTEIN: growth-regulating factor 1-like [Juglans regia]	GO:0005515(protein binding);GO:0005524(ATP binding);GO:0005634(nucleus);GO:0006351(transcription, DNA-templated);GO:0006355(regulation of transcription, DNA-templated);GO:0009624(response to nematode);GO:0048364(root development);GO:0048366(leaf development);GO:0061062(regulation of nematode larval development)	-	-	GRF1	4	951-973	Y	1094.16	963	50	50	0	0.0376849
miR396b	TTCCACAGCTTTCTTGAACTTT	TRINITY_DN26764_c1_g1	PREDICTED: calcium-transporting ATPase 12, plasma membrane-type-like [Juglans regia]	GO:0005388(calcium-transporting ATPase activity);GO:0005887(integral component of plasma membrane);GO:0043231(intracellular membrane-bounded organelle)	ko00190(Oxidative phosphorylation)	-	ACA12	3.5	33-55	Y	21.8832	46	1	1	4	0.81363
miR396b	TTCCACAGCTTTCTTGAACTTT	TRINITY_DN27826_c1_g1	PREDICTED: growth-regulating factor 4-like [Juglans regia]	GO:0005524(ATP binding);GO:0005634(nucleus);GO:0006351(transcription, DNA-templated);GO:0006355(regulation of transcription, DNA-templated);GO:0048366(leaf development)	ko00130(Ubiquinone and other terpenoid-quinone biosynthesis)	-	GRF3	4	393-415	Y	372.014	405	17	17	0	0.0376849
miR396b	TTCCACAGCTTTCTTGAACTTT	TRINITY_DN45646_c0_g1	Lipoyltransferase 2 isoform 1 [Theobroma cacao]	-	ko00785(Lipoic acid metabolism)	-	-	3.5	66-87	Y	372.014	78	17	17	0	0.0217113
miR397b	TCATTGAGTGCAGCGTTGATC	TRINITY_DN24833_c2_g3	laccase [Betula platyphylla]	GO:0005507(copper ion binding);GO:0009809(lignin biosynthetic process);GO:0016722(oxidoreductase activity, oxidizing metal ions)	ko00053(Ascorbate and aldarate metabolism)	-	IRX12	2	750-770	Y	744.028	761	34	34	2	0.7748
miR397b	TCATTGAGTGCAGCGTTGATC	TRINITY_DN25458_c2_g1	PREDICTED: glutelin type-B 5-like [Juglans regia]	GO:0005575(cellular_component);GO:0008150(biological_process);GO:0045735(nutrient reservoir activity)	-	-	CRD	4	1053-1073	Y	196.949	1064	9	9	2	0.850033
miR397b	TCATTGAGTGCAGCGTTGATC	TRINITY_DN26934_c1_g1	PREDICTED: laccase-17-like [Juglans regia]	GO:0005507(copper ion binding);GO:0009809(lignin biosynthetic process);GO:0016722(oxidoreductase activity, oxidizing metal ions)	ko00053(Ascorbate and aldarate metabolism)	-	LAC17	2	720-740	Y	87.5327	731	4	4	2	0.7748
miR397b	TCATTGAGTGCAGCGTTGATC	TRINITY_DN27015_c0_g1	PREDICTED: laccase-17-like [Juglans regia]	GO:0005507(copper ion binding);GO:0009809(lignin biosynthetic process);GO:0016722(oxidoreductase activity, oxidizing metal ions)	ko00053(Ascorbate and aldarate metabolism)	-	LAC17	3	587-607	Y	142.241	598	13	6.5	2	0.704686
miR397b	TCATTGAGTGCAGCGTTGATC	TRINITY_DN26783_c1_g6	hypothetical protein MANES_18G128000 [Manihot esculenta]	GO:0005507(copper ion binding);GO:0016722(oxidoreductase activity, oxidizing metal ions)	-	-	LAC13	4	118-138	Y	87.5327	129	4	4	2	0.850033
miR397b	TCATTGAGTGCAGCGTTGATC	TRINITY_DN29085_c0_g1	PREDICTED: laccase-17-like [Juglans regia]	GO:0005507(copper ion binding);GO:0009809(lignin biosynthetic process);GO:0016722(oxidoreductase activity, oxidizing metal ions)	ko00053(Ascorbate and aldarate metabolism)	-	LAC17	3.5	81-101	Y	142.241	92	13	6.5	2	0.418472
miR397b	TCATTGAGTGCAGCGTTGATC	TRINITY_DN28629_c3_g4	PREDICTED: laccase-7-like [Juglans regia]	GO:0005507(copper ion binding);GO:0016722(oxidoreductase activity, oxidizing metal ions)	ko00053(Ascorbate and aldarate metabolism)	-	LAC9	4	102-122	Y	262.598	113	12	12	2	0.850033
miR397c	TCATTGAGTGCAGCGTTGATT	TRINITY_DN24833_c2_g3	laccase [Betula platyphylla]	GO:0005507(copper ion binding);GO:0009809(lignin biosynthetic process);GO:0016722(oxidoreductase activity, oxidizing metal ions)	ko00053(Ascorbate and aldarate metabolism)	-	IRX12	1	750-770	Y	744.028	761	34	34	2	0.585593
miR397c	TCATTGAGTGCAGCGTTGATT	TRINITY_DN27015_c0_g1	PREDICTED: laccase-17-like [Juglans regia]	GO:0005507(copper ion binding);GO:0009809(lignin biosynthetic process);GO:0016722(oxidoreductase activity, oxidizing metal ions)	ko00053(Ascorbate and aldarate metabolism)	-	LAC17	2	587-607	Y	142.241	598	13	6.5	2	0.525447
miR397c	TCATTGAGTGCAGCGTTGATT	TRINITY_DN26934_c1_g1	PREDICTED: laccase-17-like [Juglans regia]	GO:0005507(copper ion binding);GO:0009809(lignin biosynthetic process);GO:0016722(oxidoreductase activity, oxidizing metal ions)	ko00053(Ascorbate and aldarate metabolism)	-	LAC17	2.5	720-740	Y	87.5327	731	4	4	2	0.742115
miR397c	TCATTGAGTGCAGCGTTGATT	TRINITY_DN26783_c1_g6	hypothetical protein MANES_18G128000 [Manihot esculenta]	GO:0005507(copper ion binding);GO:0016722(oxidoreductase activity, oxidizing metal ions)	-	-	LAC13	4	118-138	Y	87.5327	129	4	4	2	0.612744
miR397c	TCATTGAGTGCAGCGTTGATT	TRINITY_DN29085_c0_g1	PREDICTED: laccase-17-like [Juglans regia]	GO:0005507(copper ion binding);GO:0009809(lignin biosynthetic process);GO:0016722(oxidoreductase activity, oxidizing metal ions)	ko00053(Ascorbate and aldarate metabolism)	-	LAC17	2.5	81-101	Y	142.241	92	13	6.5	2	0.742115
miR397c	TCATTGAGTGCAGCGTTGATT	TRINITY_DN28629_c3_g4	PREDICTED: laccase-7-like [Juglans regia]	GO:0005507(copper ion binding);GO:0016722(oxidoreductase activity, oxidizing metal ions)	ko00053(Ascorbate and aldarate metabolism)	-	LAC9	3	102-122	Y	262.598	113	12	12	2	0.456572
miR397c	TCATTGAGTGCAGCGTTGATT	TRINITY_DN29399_c1_g2	PREDICTED: lecithin-cholesterol acyltransferase-like 1 [Juglans regia]	GO:0004607(phosphatidylcholine-sterol O-acyltransferase activity);GO:0005576(extracellular region);GO:0005773(vacuole);GO:0005774(vacuolar membrane);GO:0006629(lipid metabolic process);GO:0008374(O-acyltransferase activity);GO:0016021(integral component of membrane)	ko00564(Glycerophospholipid metabolism)	-	LCAT1	3.5	1008-1027	Y	87.5327	1018	4	4	2	0.661825
miR399c	TGCCAAAGGAGAATTGCCC	TRINITY_DN28842_c1_g1	-	-	-	-	-	2	1050-1068	Y	459.547	1059	21	21	2	0.525447
miR399c	TGCCAAAGGAGAATTGCCC	TRINITY_DN28658_c0_g2	PREDICTED: phospholipase D delta [Ziziphus jujuba]	GO:0004630(phospholipase D activity);GO:0005509(calcium ion binding);GO:0005773(vacuole);GO:0005886(plasma membrane);GO:0009409(response to cold);GO:0009506(plasmodesma);GO:0009789(positive regulation of abscisic acid-activated signaling pathway);GO:0012501(programmed cell death);GO:0016020(membrane);GO:0016042(lipid catabolic process);GO:0046470(phosphatidylcholine metabolic process);GO:0046473(…	ko00564(Glycerophospholipid metabolism);ko00565(Ether lipid metabolism);ko04144(Endocytosis)	-	PLDDELTA	4	885-903	Y	21.8832	894	1	1	4	0.987846
miR403b	TTAGATTCACGCACAAACTT	TRINITY_DN23405_c0_g6	PREDICTED: uncharacterized protein LOC108990185 [Juglans regia]	GO:0003674(molecular_function);GO:0005773(vacuole);GO:0005774(vacuolar membrane);GO:0008150(biological_process)	-	-	-	3.5	355-374	Y	21.8832	365	1	1	4	0.673725
miR403b	TTAGATTCACGCACAAACTT	TRINITY_DN27428_c1_g4	PREDICTED: protein argonaute 2 [Juglans regia]	GO:0005515(protein binding);GO:0005737(cytoplasm);GO:0006351(transcription, DNA-templated);GO:0006355(regulation of transcription, DNA-templated);GO:0006417(regulation of translation);GO:0019048(modulation by virus of host morphology or physiology);GO:0030529(intracellular ribonucleoprotein complex);GO:0031047(gene silencing by RNA);GO:0035197(siRNA binding);GO:0042742(defense response to bacteri…	-	-	AGO2	1.5	474-493	Y	1619.35	484	74	74	0	0.0109152
miR4415	TTGATTCTCATCACAACTTGG	TRINITY_DN29075_c1_g1	PREDICTED: uncharacterized protein LOC109005820 [Juglans regia]	GO:0003674(molecular_function);GO:0005576(extracellular region);GO:0008150(biological_process)	ko00480(Glutathione metabolism)	-	-	4	1187-1206	Y	43.7663	1198	2	2	2	0.850033
miR477-5'	ACTCTCCCTCAAGGGCTTCTC	TRINITY_DN26547_c1_g4	PREDICTED: vacuolar protein sorting-associated protein 2 homolog 3 [Prunus mume]	GO:0000815(ESCRT III complex);GO:0007034(vacuolar transport);GO:0015031(protein transport);GO:0016192(vesicle-mediated transport)	ko04144(Endocytosis)	-	VPS2.3	4	93-112	Y	43.7663	104	2	2	2	0.612744
miR482b	TCTTCCCTACTCCGCCCATGCC	TRINITY_DN22938_c0_g10	-	-	-	-	-	3	74-94	Y	43.7663	85	2	2	2	0.456572
miR482b	TCTTCCCTACTCCGCCCATGCC	TRINITY_DN24225_c0_g1	PREDICTED: TMV resistance protein N-like [Juglans regia]	GO:0005515(protein binding)	ko03040(Spliceosome);ko04141(Protein processing in endoplasmic reticulum);ko04144(Endocytosis)	-	-	3.5	47-68	Y	113.063	59	11	5.16667	2	0.418472
miR482b	TCTTCCCTACTCCGCCCATGCC	TRINITY_DN27609_c1_g1	PREDICTED: disease resistance protein At4g27190-like [Juglans regia]	GO:0005524(ATP binding);GO:0005739(mitochondrion);GO:0006952(defense response);GO:0043531(ADP binding)	ko04626(Plant-pathogen interaction)	-	At4g27190	4	574-595	Y	1050.39	586	48	48	2	0.612744
miR482b	TCTTCCCTACTCCGCCCATGCC	TRINITY_DN28003_c1_g2	PREDICTED: uncharacterized protein LOC109009064 [Juglans regia]	GO:0003674(molecular_function);GO:0008150(biological_process);GO:0016021(integral component of membrane)	-	-	-	4	20-41	Y	21.8832	32	1	1	4	0.624694
miR482b-5'	ATGGGCGAGTGGGGAAGA	TRINITY_DN23149_c1_g3	PREDICTED: septum-promoting GTP-binding protein 1-like [Juglans regia]	GO:0005515(protein binding);GO:0005525(GTP binding);GO:0005634(nucleus);GO:0007264(small GTPase mediated signal transduction);GO:0015031(protein transport)	ko04144(Endocytosis)	-	spg1	3.5	1157-1175	Y	21.8832	1166	1	1	4	0.98016
miR482b-5'	ATGGGCGAGTGGGGAAGA	TRINITY_DN23055_c0_g7	PREDICTED: ATP-dependent Clp protease ATP-binding subunit CLPT1, chloroplastic [Juglans regia]	GO:0005524(ATP binding);GO:0009507(chloroplast);GO:0009532(plastid stroma);GO:0009570(chloroplast stroma);GO:0009579(thylakoid);GO:0009941(chloroplast envelope);GO:0019538(protein metabolic process)	-	-	CLPT1	4	138-156	Y	65.6495	147	3	3	2	0.999997
miR482b-5'	ATGGGCGAGTGGGGAAGA	TRINITY_DN24445_c2_g3	PREDICTED: CLP protease regulatory subunit CLPX2, mitochondrial-like isoform X1 [Juglans regia]	GO:0004176(ATP-dependent peptidase activity);GO:0005524(ATP binding);GO:0005759(mitochondrial matrix);GO:0006508(proteolysis);GO:0030163(protein catabolic process)	-	-	CLPX2	4	295-312	Y	43.7663	303	2	2	2	0.999997
miR482b-5'	ATGGGCGAGTGGGGAAGA	TRINITY_DN26208_c1_g4	PREDICTED: serine/threonine-protein kinase At5g01020-like [Juglans regia]	GO:0004674(protein serine/threonine kinase activity);GO:0005524(ATP binding);GO:0005886(plasma membrane);GO:0006468(protein phosphorylation);GO:0016301(kinase activity);GO:0042742(defense response to bacterium)	ko04626(Plant-pathogen interaction)	-	RIPK	4	1211-1228	Y	175.065	1219	8	8	2	0.999997
miR482b-5'	ATGGGCGAGTGGGGAAGA	TRINITY_DN25836_c0_g1	-	-	-	-	-	4	89-105	Y	21.8832	97	1	1	4	0.999998
miR482b-5'	ATGGGCGAGTGGGGAAGA	TRINITY_DN26520_c0_g2	PREDICTED: ubiquitin fusion degradation protein 1 [Juglans regia]	GO:0005634(nucleus);GO:0006511(ubiquitin-dependent protein catabolic process)	-	-	-	4	1403-1419	Y	175.065	1411	8	8	2	0.999997
miR482b-5'	ATGGGCGAGTGGGGAAGA	TRINITY_DN26494_c3_g2	PREDICTED: cytochrome P450 CYP72A219-like isoform X2 [Pyrus x bretschneideri]	GO:0004497(monooxygenase activity)	ko00905(Brassinosteroid biosynthesis)	-	-	4	201-217	Y	87.5327	209	4	4	2	0.999997
miR482b-5'	ATGGGCGAGTGGGGAAGA	TRINITY_DN27313_c0_g3	PREDICTED: acidic leucine-rich nuclear phosphoprotein 32-related protein-like [Juglans regia]	GO:0005634(nucleus);GO:0008150(biological_process)	ko03040(Spliceosome)	-	At3g50690	4	667-685	Y	350.131	676	16	16	3	0.823167
miR482b-5'	ATGGGCGAGTGGGGAAGA	TRINITY_DN27792_c0_g5	-	-	-	-	-	3	134-150	Y	43.7663	141	2	2	1	0.0158135
miR482b-5'	ATGGGCGAGTGGGGAAGA	TRINITY_DN28888_c1_g3	PREDICTED: uncharacterized protein LOC109019883 isoform X1 [Juglans regia]	GO:0003674(molecular_function);GO:0005634(nucleus);GO:0008150(biological_process)	-	-	-	3.5	220-237	Y	87.5327	228	4	4	2	0.97751
miR530c	AGGTGCAGGTGCAGGTGCAGG	TRINITY_DN28856_c2_g2	PREDICTED: biotin carboxyl carrier protein of acetyl-CoA carboxylase, chloroplastic isoform X1 [Juglans regia]	GO:0003989(acetyl-CoA carboxylase activity);GO:0006633(fatty acid biosynthetic process);GO:0009317(acetyl-CoA carboxylase complex);GO:0009374(biotin binding);GO:0009507(chloroplast);GO:0009536(plastid);GO:0009570(chloroplast stroma);GO:0009941(chloroplast envelope)	ko01200(Carbon metabolism);ko01212(Fatty acid metabolism);ko00620(Pyruvate metabolism);ko00640(Propanoate metabolism);ko00061(Fatty acid biosynthesis);ko00253(Tetracycline biosynthesis)	-	BCCP1	1	796-816	Y	196.949	807	9	9	2	0.585593
miR7122b	TTATTCAGAGAAATCACGGT	TRINITY_DN27019_c2_g2	PREDICTED: pre-mRNA-splicing factor ATP-dependent RNA helicase DEAH7 isoform X1 [Juglans regia]	GO:0000398(mRNA splicing, via spliceosome);GO:0004004(ATP-dependent RNA helicase activity);GO:0005681(spliceosomal complex);GO:0005737(cytoplasm);GO:0044822(poly(A) RNA binding)	ko03040(Spliceosome)	-	CUV	4	530-548	Y	131.299	539	6	6	2	0.986004
miR7122b	TTATTCAGAGAAATCACGGT	TRINITY_DN27147_c1_g2	PREDICTED: putative pentatricopeptide repeat-containing protein At1g12700, mitochondrial [Vigna radiata var. radiata]	-	-	-	-	1	275-294	Y	21.8832	285	1	1	4	0.597481
miR7122b	TTATTCAGAGAAATCACGGT	TRINITY_DN27260_c2_g9	PREDICTED: pentatricopeptide repeat-containing protein At1g62914, mitochondrial-like isoform X1 [Nelumbo nucifera]	-	-	-	At1g12700	2.5	36-55	Y	21.8832	46	2	1	2	0.742115
miR7122b	TTATTCAGAGAAATCACGGT	TRINITY_DN27956_c1_g1	hypothetical protein TanjilG_31373 [Lupinus angustifolius]	GO:0005739(mitochondrion);GO:0008150(biological_process)	-	-	At3g16710	2.5	586-605	Y	21.8832	596	2	1	2	0.742115
miR7122b-3'	ACCGTGTTTCTCTGTATAAAG	TRINITY_DN25427_c0_g5	PREDICTED: uncharacterized protein LOC109004763 isoform X1 [Juglans regia]	GO:0008152(metabolic process);GO:0009507(chloroplast);GO:0016787(hydrolase activity)	ko00740(Riboflavin metabolism)	-	-	4	775-794	Y	21.8832	785	1	1	4	0.859145
miR7122c	TTATACAATGAAATCACGGCC	TRINITY_DN28757_c2_g1	PREDICTED: protein ECERIFERUM 26-like [Prunus mume]	GO:0009535(chloroplast thylakoid membrane);GO:0009555(pollen development);GO:0016740(transferase activity);GO:0016747(transferase activity, transferring acyl groups other than amino-acyl groups);GO:0042761(very long-chain fatty acid biosynthetic process);GO:0071555(cell wall organization)	-	-	CER26L	4	337-358	Y	43.7663	349	2	2	2	0.759011
miR858	TTCGTTGTCTGTTCGACCTTG	TRINITY_DN22981_c2_g4	PREDICTED: myb-related protein 305-like [Juglans regia]	GO:0003677(DNA binding);GO:0003700(transcription factor activity, sequence-specific DNA binding);GO:0005634(nucleus);GO:0006355(regulation of transcription, DNA-templated);GO:0009686(gibberellin biosynthetic process);GO:0009751(response to salicylic acid);GO:0016036(cellular response to phosphate starvation)	ko00190(Oxidative phosphorylation);ko00860(Porphyrin and chlorophyll metabolism)	-	MYB108	4	334-354	Y	175.065	345	8	8	2	0.906676
miR858	TTCGTTGTCTGTTCGACCTTG	TRINITY_DN26859_c3_g7	PREDICTED: transcription factor MYB12-like isoform X2 [Juglans regia]	GO:0003677(DNA binding);GO:0003700(transcription factor activity, sequence-specific DNA binding);GO:0005515(protein binding);GO:0005524(ATP binding);GO:0005634(nucleus);GO:0006351(transcription, DNA-templated);GO:0006355(regulation of transcription, DNA-templated);GO:0006633(fatty acid biosynthetic process);GO:0006970(response to osmotic stress);GO:0009813(flavonoid biosynthetic process);GO:00100…	ko04712(Circadian rhythm - plant)	-	C1	2.5	331-350	Y	35687.8	341	1635	1630.83	0	0.0181258
miR858	TTCGTTGTCTGTTCGACCTTG	TRINITY_DN29205_c1_g1	Myb domain protein 4, putative [Theobroma cacao]	GO:0003677(DNA binding);GO:0003700(transcription factor activity, sequence-specific DNA binding);GO:0005634(nucleus);GO:0006351(transcription, DNA-templated);GO:0006355(regulation of transcription, DNA-templated);GO:0009845(seed germination);GO:0010026(trichome differentiation);GO:0010090(trichome morphogenesis);GO:0010214(seed coat development);GO:0010468(regulation of gene expression);GO:004835…	-	-	C1	2.5	14-33	Y	302.717	24	18	13.8333	2	0.742115
blu-miR10-3'	TTTGCAAGAATTGGACGGAGG	TRINITY_DN23502_c0_g3	PREDICTED: DExH-box ATP-dependent RNA helicase DExH3 isoform X1 [Juglans regia]	GO:0004004(ATP-dependent RNA helicase activity);GO:0005634(nucleus);GO:0005737(cytoplasm);GO:0006396(RNA processing);GO:0044822(poly(A) RNA binding)	ko03018(RNA degradation)	-	At1g48650	4	55-75	N
blu-miR10-3'	TTTGCAAGAATTGGACGGAGG	TRINITY_DN24300_c1_g1	PREDICTED: B3 domain-containing transcription repressor VAL2 isoform X2 [Juglans regia]	GO:0003677(DNA binding);GO:0003700(transcription factor activity, sequence-specific DNA binding);GO:0005515(protein binding);GO:0005634(nucleus);GO:0006351(transcription, DNA-templated);GO:0006355(regulation of transcription, DNA-templated);GO:0008270(zinc ion binding);GO:0010030(positive regulation of seed germination);GO:2000034(regulation of seed maturation)	-	-	Os07g0679700	2.5	155-176	N
blu-miR10-3'	TTTGCAAGAATTGGACGGAGG	TRINITY_DN25151_c0_g5	PREDICTED: U-box domain-containing protein 33-like [Juglans regia]	GO:0004674(protein serine/threonine kinase activity);GO:0004842(ubiquitin-protein transferase activity);GO:0005524(ATP binding);GO:0005886(plasma membrane);GO:0006468(protein phosphorylation);GO:0016301(kinase activity);GO:0016567(protein ubiquitination);GO:0016874(ligase activity)	ko04626(Plant-pathogen interaction)	-	PUB33	4	590-610	N
blu-miR10-3'	TTTGCAAGAATTGGACGGAGG	TRINITY_DN25679_c1_g3	-	-	-	-	-	4	170-189	N
blu-miR10-3'	TTTGCAAGAATTGGACGGAGG	TRINITY_DN25824_c0_g5	PREDICTED: uncharacterized protein LOC108986876 [Juglans regia]	GO:0004842(ubiquitin-protein transferase activity);GO:0005737(cytoplasm);GO:0008270(zinc ion binding);GO:0016567(protein ubiquitination)	-	-	-	3.5	208-229	N
blu-miR10-3'	TTTGCAAGAATTGGACGGAGG	TRINITY_DN26587_c1_g5	PREDICTED: sodium/hydrogen exchanger 2-like [Fragaria vesca subsp. vesca]	GO:0005576(extracellular region);GO:0005774(vacuolar membrane);GO:0005886(plasma membrane);GO:0006814(sodium ion transport);GO:0006885(regulation of pH);GO:0009651(response to salt stress);GO:0010107(potassium ion import);GO:0015081(sodium ion transmembrane transporter activity);GO:0015385(sodium:proton antiporter activity);GO:0015386(potassium:proton antiporter activity);GO:0016021(integral comp…	-	-	NHX2	4	375-395	N
blu-miR10-3'	TTTGCAAGAATTGGACGGAGG	TRINITY_DN27341_c2_g1	PREDICTED: trihelix transcription factor ASIL2 [Malus domestica]	GO:0003677(DNA binding);GO:0003700(transcription factor activity, sequence-specific DNA binding);GO:0005634(nucleus);GO:0006351(transcription, DNA-templated);GO:0006355(regulation of transcription, DNA-templated);GO:0009793(embryo development ending in seed dormancy);GO:0010431(seed maturation)	-	-	ASIL2	3	112-132	N
blu-miR10-3'	TTTGCAAGAATTGGACGGAGG	TRINITY_DN27603_c3_g3	PREDICTED: uncharacterized protein LOC109010751 [Juglans regia]	GO:0042254(ribosome biogenesis)	ko03010(Ribosome)	-	rpmJ	4	599-618	N
blu-miR10-3'	TTTGCAAGAATTGGACGGAGG	TRINITY_DN27995_c0_g2	PREDICTED: protein SHOOT GRAVITROPISM 6 isoform X1 [Juglans regia]	GO:0003674(molecular_function);GO:0005634(nucleus);GO:0009630(gravitropism);GO:0009660(amyloplast organization);GO:0009705(plant-type vacuole membrane);GO:0009958(positive gravitropism);GO:0009959(negative gravitropism)	-	-	SGR6	3	645-665	N
blu-miR10-3'	TTTGCAAGAATTGGACGGAGG	TRINITY_DN28682_c0_g1	PREDICTED: probable LRR receptor-like serine/threonine-protein kinase At1g67720 [Ziziphus jujuba]	GO:0004672(protein kinase activity);GO:0004674(protein serine/threonine kinase activity);GO:0005524(ATP binding);GO:0005886(plasma membrane);GO:0006468(protein phosphorylation);GO:0016021(integral component of membrane);GO:0016301(kinase activity);GO:0016310(phosphorylation)	ko04626(Plant-pathogen interaction)	-	At1g67720	4	764-784	N
blu-miR10-3'	TTTGCAAGAATTGGACGGAGG	TRINITY_DN29001_c0_g1	PREDICTED: uncharacterized protein LOC109006573 [Juglans regia]	GO:0006405(RNA export from nucleus);GO:0006606(protein import into nucleus);GO:0017056(structural constituent of nuclear pore);GO:0044611(nuclear pore inner ring)	ko03013(RNA transport)	-	-	4	82-102	N
blu-miR10-3'	TTTGCAAGAATTGGACGGAGG	TRINITY_DN29115_c1_g1	PREDICTED: uncharacterized protein LOC108997101 isoform X1 [Juglans regia]	GO:0004842(ubiquitin-protein transferase activity);GO:0005576(extracellular region);GO:0008270(zinc ion binding)	-	-	Cacna2d4	4	1014-1034	N
blu-miR10-3'	TTTGCAAGAATTGGACGGAGG	TRINITY_DN44953_c0_g1	-	-	-	-	-	3	158-178	N
blu-miR10-5'	TCCGTCCAACTTTTGCAAATT	TRINITY_DN23518_c1_g1	PREDICTED: peptidyl-prolyl cis-trans isomerase CYP37, chloroplastic isoform X2 [Juglans regia]	GO:0000209(protein polyubiquitination);GO:0003755(peptidyl-prolyl cis-trans isomerase activity);GO:0005634(nucleus);GO:0034450(ubiquitin-ubiquitin ligase activity)	-	-	CYP37	4	136-155	N
blu-miR10-5'	TCCGTCCAACTTTTGCAAATT	TRINITY_DN24236_c1_g5	PREDICTED: folate synthesis bifunctional protein, mitochondrial-like [Juglans regia]	GO:0000287(magnesium ion binding);GO:0003848(2-amino-4-hydroxy-6-hydroxymethyldihydropteridine diphosphokinase activity);GO:0004156(dihydropteroate synthase activity);GO:0005739(mitochondrion);GO:0046656(folic acid biosynthetic process)	ko00790(Folate biosynthesis)	-	MitHPPK/DHPS	2	36-56	N
blu-miR10-5'	TCCGTCCAACTTTTGCAAATT	TRINITY_DN26587_c1_g5	PREDICTED: sodium/hydrogen exchanger 2-like [Fragaria vesca subsp. vesca]	GO:0005576(extracellular region);GO:0005774(vacuolar membrane);GO:0005886(plasma membrane);GO:0006814(sodium ion transport);GO:0006885(regulation of pH);GO:0009651(response to salt stress);GO:0010107(potassium ion import);GO:0015081(sodium ion transmembrane transporter activity);GO:0015385(sodium:proton antiporter activity);GO:0015386(potassium:proton antiporter activity);GO:0016021(integral comp…	-	-	NHX2	3	436-456	N
blu-miR10-5'	TCCGTCCAACTTTTGCAAATT	TRINITY_DN26955_c1_g1	-	-	-	-	-	4	235-254	N
blu-miR10-5'	TCCGTCCAACTTTTGCAAATT	TRINITY_DN27341_c2_g8	-	-	ko00053(Ascorbate and aldarate metabolism);ko00562(Inositol phosphate metabolism)	-	-	4	273-294	N
blu-miR10-5'	TCCGTCCAACTTTTGCAAATT	TRINITY_DN28183_c0_g2	PREDICTED: protein trichome birefringence-like [Juglans regia]	GO:0005794(Golgi apparatus);GO:0016413(O-acetyltransferase activity);GO:0071554(cell wall organization or biogenesis)	-	-	TBR	4	1071-1091	N
blu-miR10-5'	TCCGTCCAACTTTTGCAAATT	TRINITY_DN28971_c3_g3	-	-	-	-	-	4	328-348	N
blu-miR11-3'	ATGGACAAAGATAGATGAATTTGG	TRINITY_DN24222_c0_g4	-	-	-	-	-	2.5	72-95	N
blu-miR11-3'	ATGGACAAAGATAGATGAATTTGG	TRINITY_DN25078_c2_g1	PREDICTED: transmembrane E3 ubiquitin-protein ligase 1 [Ricinus communis]	GO:0000209(protein polyubiquitination);GO:0042787(protein ubiquitination involved in ubiquitin-dependent protein catabolic process);GO:0043161(proteasome-mediated ubiquitin-dependent protein catabolic process);GO:0061630(ubiquitin protein ligase activity)	-	-	TUL1	3.5	2212-2234	N
blu-miR11-3'	ATGGACAAAGATAGATGAATTTGG	TRINITY_DN28596_c0_g1	-	-	-	-	-	3	84-107	N
blu-miR12-3'	TATGGAGTCTCTCATATTGCC	TRINITY_DN25543_c0_g2	hypothetical protein VITISV_041689 [Vitis vinifera]	-	-	-	-	4	52-71	N
blu-miR12-3'	TATGGAGTCTCTCATATTGCC	TRINITY_DN27813_c1_g4	hypothetical protein CICLE_v10021298mg [Citrus clementina]	-	-	-	-	3.5	179-200	N
blu-miR14-5'	TTTAAGTCCGTCTGCAAATCC	TRINITY_DN26182_c0_g4	PREDICTED: alkaline/neutral invertase A, mitochondrial isoform X1 [Juglans regia]	GO:0004564(beta-fructofuranosidase activity);GO:0004575(sucrose alpha-glucosidase activity);GO:0005739(mitochondrion);GO:0005987(sucrose catabolic process);GO:0033926(glycopeptide alpha-N-acetylgalactosaminidase activity);GO:0042542(response to hydrogen peroxide);GO:0048364(root development)	ko03010(Ribosome)	-	INVA	3	338-358	N
blu-miR14-5'	TTTAAGTCCGTCTGCAAATCC	TRINITY_DN27739_c0_g5	-	-	-	-	-	3	116-136	N
blu-miR14-5'	TTTAAGTCCGTCTGCAAATCC	TRINITY_DN43172_c0_g1	-	-	-	-	-	4	227-248	N
blu-miR16-3'	AACCCAATATTAATAGATGACACT	TRINITY_DN23537_c4_g2	-	-	-	-	-	0	161-184	N
blu-miR16-3'	AACCCAATATTAATAGATGACACT	TRINITY_DN29006_c0_g2	-	-	ko00330(Arginine and proline metabolism)	-	-	4	392-415	N
blu-miR19b-3'	CACATGACACGTTTAGAGACA	TRINITY_DN23989_c0_g2	-	-	-	-	-	4	198-218	N
blu-miR19b-3'	CACATGACACGTTTAGAGACA	TRINITY_DN24267_c1_g1	PREDICTED: uncharacterized protein LOC108994427 isoform X1 [Juglans regia]	GO:0004497(monooxygenase activity);GO:0044550(secondary metabolite biosynthetic process)	ko00906(Carotenoid biosynthesis)	-	pqsH	4	710-730	N
blu-miR19b-3'	CACATGACACGTTTAGAGACA	TRINITY_DN25540_c0_g3	cinnamoyl-CoA reductase 1 [Betula platyphylla]	GO:0003824(catalytic activity);GO:0009809(lignin biosynthetic process);GO:0016621(cinnamoyl-CoA reductase activity);GO:0050662(coenzyme binding)	ko00940(Phenylpropanoid biosynthesis)	-	CCR1	4	768-788	N
blu-miR19b-3'	CACATGACACGTTTAGAGACA	TRINITY_DN26067_c1_g1	PREDICTED: uncharacterized protein LOC108991099 [Juglans regia]	GO:0005739(mitochondrion);GO:0009055(electron carrier activity);GO:0046872(metal ion binding);GO:0051537(2 iron, 2 sulfur cluster binding);GO:0055114(oxidation-reduction process)	-	-	MFDX2	3.5	622-643	N
blu-miR19b-3'	CACATGACACGTTTAGAGACA	TRINITY_DN29398_c1_g3	PREDICTED: uncharacterized protein LOC108986298 isoform X1 [Juglans regia]	GO:0005515(protein binding);GO:0005524(ATP binding);GO:0005618(cell wall);GO:0005634(nucleus);GO:0005794(Golgi apparatus);GO:0005829(cytosol);GO:0005886(plasma membrane);GO:0006351(transcription, DNA-templated);GO:0006355(regulation of transcription, DNA-templated);GO:0006457(protein folding);GO:0009408(response to heat);GO:0009615(response to virus);GO:0009617(response to bacterium);GO:0046686(r…	ko03040(Spliceosome);ko04141(Protein processing in endoplasmic reticulum);ko04144(Endocytosis)	-	HSP70	4	238-258	N
blu-miR2-3'	AGGGACACATGACACTTTTATAGA	TRINITY_DN19210_c0_g1	-	-	-	-	-	4	62-85	N
blu-miR2-3'	AGGGACACATGACACTTTTATAGA	TRINITY_DN23494_c5_g1	PREDICTED: uncharacterized protein ycf36 isoform X1 [Juglans regia]	GO:0003674(molecular_function);GO:0008150(biological_process);GO:0009507(chloroplast);GO:0016021(integral component of membrane)	-	-	ycf36	3.5	993-1016	N
blu-miR2-3'	AGGGACACATGACACTTTTATAGA	TRINITY_DN23989_c0_g2	-	-	-	-	-	1	200-223	N
blu-miR2-3'	AGGGACACATGACACTTTTATAGA	TRINITY_DN29350_c0_g1	-	-	-	-	-	2	157-180	N
blu-miR2-3'	AGGGACACATGACACTTTTATAGA	TRINITY_DN29398_c1_g3	PREDICTED: uncharacterized protein LOC108986298 isoform X1 [Juglans regia]	GO:0005515(protein binding);GO:0005524(ATP binding);GO:0005618(cell wall);GO:0005634(nucleus);GO:0005794(Golgi apparatus);GO:0005829(cytosol);GO:0005886(plasma membrane);GO:0006351(transcription, DNA-templated);GO:0006355(regulation of transcription, DNA-templated);GO:0006457(protein folding);GO:0009408(response to heat);GO:0009615(response to virus);GO:0009617(response to bacterium);GO:0046686(r…	ko03040(Spliceosome);ko04141(Protein processing in endoplasmic reticulum);ko04144(Endocytosis)	-	HSP70	2	240-263	N
blu-miR21-3'	AATCTAATGATGATTTTCACTGCC	TRINITY_DN15423_c0_g1	-	-	-	-	-	3.5	153-176	N
blu-miR21-3'	AATCTAATGATGATTTTCACTGCC	TRINITY_DN24512_c1_g4	PREDICTED: branched-chain-amino-acid aminotransferase 6-like isoform X1 [Juglans regia]	GO:0003824(catalytic activity);GO:0005737(cytoplasm);GO:0005829(cytosol);GO:0009097(isoleucine biosynthetic process);GO:0009098(leucine biosynthetic process);GO:0009099(valine biosynthetic process);GO:0010326(methionine-oxo-acid transaminase activity);GO:0033506(glucosinolate biosynthetic process from homomethionine);GO:0052654(L-leucine transaminase activity);GO:0052655(L-valine transaminase act…	ko01210(2-Oxocarboxylic acid metabolism);ko01230(Biosynthesis of amino acids);ko00270(Cysteine and methionine metabolism);ko00280(Valine, leucine and isoleucine degradation);ko00290(Valine, leucine and isoleucine biosynthesis);ko00770(Pantothenate and CoA biosynthesis)	-	BCAT6	3.5	1413-1435	N
blu-miR21-3'	AATCTAATGATGATTTTCACTGCC	TRINITY_DN26566_c1_g6	-	-	-	-	-	4	114-136	N
blu-miR21-3'	AATCTAATGATGATTTTCACTGCC	TRINITY_DN28533_c0_g1	PREDICTED: alanine--tRNA ligase, chloroplastic/mitochondrial [Juglans regia]	GO:0000049(tRNA binding);GO:0004813(alanine-tRNA ligase activity);GO:0005739(mitochondrion);GO:0005829(cytosol);GO:0006400(tRNA modification);GO:0006419(alanyl-tRNA aminoacylation);GO:0009507(chloroplast);GO:0016597(amino acid binding)	ko00970(Aminoacyl-tRNA biosynthesis)	-	POPTRDRAFT_821063	4	372-395	N
blu-miR21-3'	AATCTAATGATGATTTTCACTGCC	TRINITY_DN28975_c2_g2	-	-	-	-	-	3	24-47	N
blu-miR21-3'	AATCTAATGATGATTTTCACTGCC	TRINITY_DN29376_c1_g3	PREDICTED: uncharacterized protein LOC108991180 [Juglans regia]	GO:0006368(transcription elongation from RNA polymerase II promoter);GO:0070449(elongin complex)	-	-	-	4	2841-2863	N
blu-miR24-5'	AATAAATGCCAAGTGTTCTCTAAC	TRINITY_DN27317_c2_g4	-	-	-	-	-	2.5	103-126	N
blu-miR24-5'	AATAAATGCCAAGTGTTCTCTAAC	TRINITY_DN602_c0_g1	-	-	-	-	-	2	224-247	N
blu-miR3-3'	AATGATAATTTTAAAAGCCACATC	TRINITY_DN15344_c1_g1	-	-	-	-	-	4	77-100	N
blu-miR3-3'	AATGATAATTTTAAAAGCCACATC	TRINITY_DN20134_c0_g1	-	-	-	-	-	1.5	212-235	N
blu-miR3-3'	AATGATAATTTTAAAAGCCACATC	TRINITY_DN20972_c0_g1	-	-	-	-	-	4	10-33	N
blu-miR3-3'	AATGATAATTTTAAAAGCCACATC	TRINITY_DN22987_c1_g1	PREDICTED: cellulose synthase-like protein G3 isoform X1 [Juglans regia]	GO:0000139(Golgi membrane);GO:0000271(polysaccharide biosynthetic process);GO:0005886(plasma membrane);GO:0016021(integral component of membrane);GO:0016740(transferase activity);GO:0016757(transferase activity, transferring glycosyl groups);GO:0016759(cellulose synthase activity);GO:0016760(cellulose synthase (UDP-forming) activity);GO:0030244(cellulose biosynthetic process);GO:0071555(cell wall…	-	-	CSLG3	2	1082-1105	N
blu-miR3-3'	AATGATAATTTTAAAAGCCACATC	TRINITY_DN23114_c5_g1	-	-	-	-	-	3.5	25-48	N
blu-miR3-3'	AATGATAATTTTAAAAGCCACATC	TRINITY_DN23259_c0_g10	-	-	-	-	-	1.5	291-314	N
blu-miR3-3'	AATGATAATTTTAAAAGCCACATC	TRINITY_DN23259_c0_g3	PREDICTED: F-box/FBD/LRR-repeat protein At1g13570-like [Juglans regia]	GO:0003674(molecular_function);GO:0005634(nucleus);GO:0008150(biological_process)	-	-	At3g58860	1	1665-1688	N
blu-miR3-3'	AATGATAATTTTAAAAGCCACATC	TRINITY_DN23259_c0_g7	-	-	-	-	-	2	127-150	N
blu-miR3-3'	AATGATAATTTTAAAAGCCACATC	TRINITY_DN23280_c7_g1	-	-	-	-	-	1	123-146	N
blu-miR3-3'	AATGATAATTTTAAAAGCCACATC	TRINITY_DN23636_c0_g7	-	-	-	-	-	4	71-94	N
blu-miR3-3'	AATGATAATTTTAAAAGCCACATC	TRINITY_DN23683_c2_g4	-	-	-	-	-	1	278-301	N
blu-miR3-3'	AATGATAATTTTAAAAGCCACATC	TRINITY_DN24158_c0_g3	-	-	-	-	-	4	623-646	N
blu-miR3-3'	AATGATAATTTTAAAAGCCACATC	TRINITY_DN24530_c1_g7	-	-	-	-	-	4	150-173	N
blu-miR3-3'	AATGATAATTTTAAAAGCCACATC	TRINITY_DN24756_c1_g8	-	-	-	-	-	4	223-246	N
blu-miR3-3'	AATGATAATTTTAAAAGCCACATC	TRINITY_DN24812_c1_g2	hypothetical protein PRUPE_ppa010749mg [Prunus persica]	GO:0005515(protein binding);GO:0005634(nucleus);GO:0005737(cytoplasm);GO:0007034(vacuolar transport);GO:0016192(vesicle-mediated transport)	ko04144(Endocytosis)	-	chmp5	3	1229-1252	N
blu-miR3-3'	AATGATAATTTTAAAAGCCACATC	TRINITY_DN25191_c0_g2	-	-	-	-	-	3.5	173-196	N
blu-miR3-3'	AATGATAATTTTAAAAGCCACATC	TRINITY_DN25214_c3_g3	-	-	-	-	-	4	128-151	N
blu-miR3-3'	AATGATAATTTTAAAAGCCACATC	TRINITY_DN25252_c3_g5	PREDICTED: ABC transporter G family member 11 [Juglans regia]	GO:0005886(plasma membrane);GO:0015245(fatty acid transporter activity);GO:0016021(integral component of membrane);GO:0042626(ATPase activity, coupled to transmembrane movement of substances)	ko02010(ABC transporters)	-	ABCG11	3.5	2331-2354	N
blu-miR3-3'	AATGATAATTTTAAAAGCCACATC	TRINITY_DN26132_c1_g1	PREDICTED: CLAVATA3/ESR (CLE)-related protein 4-like [Prunus mume]	GO:0005576(extracellular region);GO:0005615(extracellular space);GO:0007275(multicellular organism development);GO:0010075(regulation of meristem growth);GO:0048046(apoplast)	-	-	CLE4	3.5	305-328	N
blu-miR3-3'	AATGATAATTTTAAAAGCCACATC	TRINITY_DN26205_c0_g2	PREDICTED: uncharacterized protein LOC109002057 [Juglans regia]	GO:0005886(plasma membrane);GO:0016020(membrane);GO:0016021(integral component of membrane)	-	-	-	4	1126-1149	N
blu-miR3-3'	AATGATAATTTTAAAAGCCACATC	TRINITY_DN27054_c0_g1	-	-	-	-	-	2.5	358-381	N
blu-miR3-3'	AATGATAATTTTAAAAGCCACATC	TRINITY_DN27203_c2_g2	PREDICTED: uncharacterized protein LOC107420918 isoform X2 [Ziziphus jujuba]	GO:0003674(molecular_function);GO:0005773(vacuole);GO:0008150(biological_process);GO:0009507(chloroplast);GO:0016021(integral component of membrane)	-	-	-	3	991-1014	N
blu-miR3-3'	AATGATAATTTTAAAAGCCACATC	TRINITY_DN27708_c3_g1	-	-	-	-	-	2	175-198	N
blu-miR3-3'	AATGATAATTTTAAAAGCCACATC	TRINITY_DN27763_c0_g9	-	-	-	-	-	4	280-303	N
blu-miR3-3'	AATGATAATTTTAAAAGCCACATC	TRINITY_DN29002_c1_g1	-	-	-	-	-	3	21-44	N
blu-miR3-3'	AATGATAATTTTAAAAGCCACATC	TRINITY_DN29002_c3_g7	-	-	-	-	-	4	450-473	N
blu-miR3-3'	AATGATAATTTTAAAAGCCACATC	TRINITY_DN29074_c2_g1	-	-	-	-	-	4	219-242	N
blu-miR3-3'	AATGATAATTTTAAAAGCCACATC	TRINITY_DN44764_c0_g1	-	-	-	-	-	3	180-203	N
blu-miR3-3'	AATGATAATTTTAAAAGCCACATC	TRINITY_DN45259_c0_g1	-	-	-	-	-	3.5	331-354	N
blu-miR3-3'	AATGATAATTTTAAAAGCCACATC	TRINITY_DN5790_c0_g1	-	-	-	-	-	4	218-241	N
blu-miR3-5'	AATAATGTGACTTTTAAAATTACC	TRINITY_DN14191_c0_g1	-	-	-	-	-	3	168-191	N
blu-miR3-5'	AATAATGTGACTTTTAAAATTACC	TRINITY_DN20085_c0_g1	-	-	-	-	-	4	33-56	N
blu-miR3-5'	AATAATGTGACTTTTAAAATTACC	TRINITY_DN23537_c11_g1	-	-	-	-	-	3.5	8-31	N
blu-miR3-5'	AATAATGTGACTTTTAAAATTACC	TRINITY_DN25851_c0_g2	PREDICTED: aldehyde dehydrogenase family 2 member C4-like [Juglans regia]	GO:0004029(aldehyde dehydrogenase (NAD) activity)	ko00940(Phenylpropanoid biosynthesis)	-	ALDH2C4	4	1210-1233	N
blu-miR3-5'	AATAATGTGACTTTTAAAATTACC	TRINITY_DN27212_c0_g7	-	-	-	-	-	4	162-185	N
blu-miR3-5'	AATAATGTGACTTTTAAAATTACC	TRINITY_DN27883_c3_g1	-	-	-	-	-	3	21-44	N
blu-miR3-5'	AATAATGTGACTTTTAAAATTACC	TRINITY_DN36922_c0_g1	-	-	-	-	-	3.5	61-83	N
blu-miR3-5'	AATAATGTGACTTTTAAAATTACC	TRINITY_DN9133_c0_g1	-	-	-	-	-	3.5	217-239	N
blu-miR34-3'	ATAGAGATGGACAAGTAGCATTGT	TRINITY_DN18721_c0_g1	-	-	-	-	-	2	237-260	N
blu-miR36-5'	ATTGATGTGGCTTTTAAAATTACC	TRINITY_DN14191_c0_g1	-	-	-	-	-	3	168-191	N
blu-miR36-5'	ATTGATGTGGCTTTTAAAATTACC	TRINITY_DN23259_c0_g10	-	-	-	-	-	3	335-358	N
blu-miR36-5'	ATTGATGTGGCTTTTAAAATTACC	TRINITY_DN23280_c3_g1	-	-	-	-	-	3	188-211	N
blu-miR36-5'	ATTGATGTGGCTTTTAAAATTACC	TRINITY_DN23280_c3_g7	-	-	-	-	-	2.5	29-52	N
blu-miR36-5'	ATTGATGTGGCTTTTAAAATTACC	TRINITY_DN23280_c3_g8	-	-	-	-	-	2	58-81	N
blu-miR36-5'	ATTGATGTGGCTTTTAAAATTACC	TRINITY_DN23537_c8_g2	PREDICTED: uncharacterized protein LOC109015735, partial [Juglans regia]	-	-	-	-	3.5	455-478	N
blu-miR36-5'	ATTGATGTGGCTTTTAAAATTACC	TRINITY_DN23537_c9_g1	-	-	-	-	-	4	48-71	N
blu-miR36-5'	ATTGATGTGGCTTTTAAAATTACC	TRINITY_DN23636_c0_g7	-	-	-	-	-	4	132-155	N
blu-miR36-5'	ATTGATGTGGCTTTTAAAATTACC	TRINITY_DN23683_c1_g1	-	-	-	-	-	4	577-599	N
blu-miR36-5'	ATTGATGTGGCTTTTAAAATTACC	TRINITY_DN24335_c1_g1	-	-	-	-	-	4	242-265	N
blu-miR36-5'	ATTGATGTGGCTTTTAAAATTACC	TRINITY_DN25191_c0_g3	-	-	-	-	-	2.5	834-857	N
blu-miR36-5'	ATTGATGTGGCTTTTAAAATTACC	TRINITY_DN25191_c0_g4	-	-	-	-	-	2.5	36-59	N
blu-miR36-5'	ATTGATGTGGCTTTTAAAATTACC	TRINITY_DN25214_c3_g4	-	-	-	-	-	4	105-127	N
blu-miR36-5'	ATTGATGTGGCTTTTAAAATTACC	TRINITY_DN25288_c1_g2	PREDICTED: protein cornichon homolog 4-like [Juglans regia]	GO:0005515(protein binding);GO:0016020(membrane);GO:0016021(integral component of membrane);GO:0035556(intracellular signal transduction)	-	-	At1g12390	4	595-618	N
blu-miR36-5'	ATTGATGTGGCTTTTAAAATTACC	TRINITY_DN25594_c0_g3	-	-	-	-	-	2	48-71	N
blu-miR36-5'	ATTGATGTGGCTTTTAAAATTACC	TRINITY_DN26205_c0_g2	PREDICTED: uncharacterized protein LOC109002057 [Juglans regia]	GO:0005886(plasma membrane);GO:0016020(membrane);GO:0016021(integral component of membrane)	-	-	-	3.5	1187-1210	N
blu-miR36-5'	ATTGATGTGGCTTTTAAAATTACC	TRINITY_DN27353_c1_g1	-	-	-	-	-	2	8-31	N
blu-miR36-5'	ATTGATGTGGCTTTTAAAATTACC	TRINITY_DN27763_c0_g9	-	-	-	-	-	3	335-358	N
blu-miR36-5'	ATTGATGTGGCTTTTAAAATTACC	TRINITY_DN27883_c3_g1	-	-	-	-	-	3	21-44	N
blu-miR36-5'	ATTGATGTGGCTTTTAAAATTACC	TRINITY_DN29002_c0_g1	-	-	-	-	-	0	316-339	N
blu-miR36-5'	ATTGATGTGGCTTTTAAAATTACC	TRINITY_DN29002_c3_g7	-	-	-	-	-	1	511-534	N
blu-miR36-5'	ATTGATGTGGCTTTTAAAATTACC	TRINITY_DN29002_c4_g1	-	-	-	-	-	2	246-269	N
blu-miR38-5'	AAACAGTCCTTGAGGTTCGACACC	TRINITY_DN24181_c0_g5	-	-	-	-	-	0	246-269	N
blu-miR4-3'	TAATAGTGAATTTGCAAGAGT	TRINITY_DN11672_c0_g1	PREDICTED: GPI ethanolamine phosphate transferase 3 isoform X1 [Juglans regia]	GO:0005789(endoplasmic reticulum membrane);GO:0006506(GPI anchor biosynthetic process);GO:0051377(mannose-ethanolamine phosphotransferase activity)	ko00563(Glycosylphosphatidylinositol(GPI)-anchor biosynthesis)	-	-	4	292-312	N
blu-miR4-3'	TAATAGTGAATTTGCAAGAGT	TRINITY_DN23227_c1_g3	-	-	-	-	-	1.5	39-59	N
blu-miR4-3'	TAATAGTGAATTTGCAAGAGT	TRINITY_DN23397_c0_g2	PREDICTED: peroxisomal 2,4-dienoyl-CoA reductase [Juglans regia]	GO:0005774(vacuolar membrane);GO:0005777(peroxisome);GO:0005829(cytosol);GO:0006631(fatty acid metabolic process);GO:0008670(2,4-dienoyl-CoA reductase (NADPH) activity);GO:0055114(oxidation-reduction process)	ko04146(Peroxisome)	-	At3g12800	2.5	937-957	N
blu-miR4-3'	TAATAGTGAATTTGCAAGAGT	TRINITY_DN23881_c2_g3	-	-	-	-	-	2.5	753-772	N
blu-miR4-3'	TAATAGTGAATTTGCAAGAGT	TRINITY_DN24152_c0_g5	PREDICTED: MLP-like protein 328 [Theobroma cacao]	GO:0003674(molecular_function);GO:0005575(cellular_component);GO:0006952(defense response);GO:0009607(response to biotic stimulus)	-	-	MLP43	4	236-255	N
blu-miR4-3'	TAATAGTGAATTTGCAAGAGT	TRINITY_DN26495_c2_g2	PREDICTED: uncharacterized protein LOC100254132 isoform X1 [Vitis vinifera]	GO:0005634(nucleus);GO:0006417(regulation of translation);GO:0016763(transferase activity, transferring pentosyl groups);GO:0019988(charged-tRNA amino acid modification);GO:0043399(tRNA A64-2'-O-ribosylphosphate transferase activity)	-	-	-	4	1108-1129	N
blu-miR4-3'	TAATAGTGAATTTGCAAGAGT	TRINITY_DN26587_c1_g5	PREDICTED: sodium/hydrogen exchanger 2-like [Fragaria vesca subsp. vesca]	GO:0005576(extracellular region);GO:0005774(vacuolar membrane);GO:0005886(plasma membrane);GO:0006814(sodium ion transport);GO:0006885(regulation of pH);GO:0009651(response to salt stress);GO:0010107(potassium ion import);GO:0015081(sodium ion transmembrane transporter activity);GO:0015385(sodium:proton antiporter activity);GO:0015386(potassium:proton antiporter activity);GO:0016021(integral comp…	-	-	NHX2	3	385-405	N
blu-miR4-3'	TAATAGTGAATTTGCAAGAGT	TRINITY_DN26870_c0_g2	-	-	-	-	-	4	156-175	N
blu-miR4-3'	TAATAGTGAATTTGCAAGAGT	TRINITY_DN27341_c2_g1	PREDICTED: trihelix transcription factor ASIL2 [Malus domestica]	GO:0003677(DNA binding);GO:0003700(transcription factor activity, sequence-specific DNA binding);GO:0005634(nucleus);GO:0006351(transcription, DNA-templated);GO:0006355(regulation of transcription, DNA-templated);GO:0009793(embryo development ending in seed dormancy);GO:0010431(seed maturation)	-	-	ASIL2	2	122-142	N
blu-miR4-3'	TAATAGTGAATTTGCAAGAGT	TRINITY_DN27341_c2_g8	-	-	ko00053(Ascorbate and aldarate metabolism);ko00562(Inositol phosphate metabolism)	-	-	4	108-129	N
blu-miR4-3'	TAATAGTGAATTTGCAAGAGT	TRINITY_DN28006_c4_g4	-	-	-	-	-	2.5	72-92	N
blu-miR4-3'	TAATAGTGAATTTGCAAGAGT	TRINITY_DN28682_c0_g1	PREDICTED: probable LRR receptor-like serine/threonine-protein kinase At1g67720 [Ziziphus jujuba]	GO:0004672(protein kinase activity);GO:0004674(protein serine/threonine kinase activity);GO:0005524(ATP binding);GO:0005886(plasma membrane);GO:0006468(protein phosphorylation);GO:0016021(integral component of membrane);GO:0016301(kinase activity);GO:0016310(phosphorylation)	ko04626(Plant-pathogen interaction)	-	At1g67720	4	774-794	N
blu-miR4-3'	TAATAGTGAATTTGCAAGAGT	TRINITY_DN32029_c0_g1	-	-	-	-	-	2	116-136	N
blu-miR4-3'	TAATAGTGAATTTGCAAGAGT	TRINITY_DN42487_c0_g1	-	-	-	-	-	3.5	136-156	N
blu-miR40-5'	AGAAAAGAAAAGGGAAGGATT	TRINITY_DN13030_c0_g1	hypothetical protein PRUPE_ppa016293mg [Prunus persica]	-	-	-	-	4	116-136	N
blu-miR40-5'	AGAAAAGAAAAGGGAAGGATT	TRINITY_DN13417_c0_g1	-	-	-	-	-	4	124-145	N
blu-miR40-5'	AGAAAAGAAAAGGGAAGGATT	TRINITY_DN17171_c0_g1	-	-	-	-	-	4	204-225	N
blu-miR40-5'	AGAAAAGAAAAGGGAAGGATT	TRINITY_DN18700_c0_g1	-	-	-	-	-	3	349-369	N
blu-miR40-5'	AGAAAAGAAAAGGGAAGGATT	TRINITY_DN19439_c0_g1	-	-	-	-	-	3.5	123-142	N
blu-miR40-5'	AGAAAAGAAAAGGGAAGGATT	TRINITY_DN20168_c0_g1	-	-	-	-	-	3.5	3-23	N
blu-miR40-5'	AGAAAAGAAAAGGGAAGGATT	TRINITY_DN23078_c3_g3	Uncharacterized protein L484_003903 [Morus notabilis]	GO:0003674(molecular_function);GO:0005789(endoplasmic reticulum membrane);GO:0006506(GPI anchor biosynthetic process);GO:0009507(chloroplast);GO:0016021(integral component of membrane)	ko00563(Glycosylphosphatidylinositol(GPI)-anchor biosynthesis)	-	SPCC1450.15	3.5	551-571	N
blu-miR40-5'	AGAAAAGAAAAGGGAAGGATT	TRINITY_DN23099_c1_g2	hypothetical protein PRUPE_ppa004018mg [Prunus persica]	GO:0005739(mitochondrion);GO:0005886(plasma membrane);GO:0006811(ion transport);GO:0009507(chloroplast);GO:0009941(chloroplast envelope);GO:0016020(membrane);GO:0016021(integral component of membrane);GO:0031966(mitochondrial membrane);GO:0055085(transmembrane transport)	-	-	MSL1	3.5	1025-1045	N
blu-miR40-5'	AGAAAAGAAAAGGGAAGGATT	TRINITY_DN23259_c0_g6	-	-	-	-	-	4	59-80	N
blu-miR40-5'	AGAAAAGAAAAGGGAAGGATT	TRINITY_DN23307_c0_g5	hypothetical protein MANES_12G089300 [Manihot esculenta]	GO:0005886(plasma membrane);GO:0015104(antimonite transmembrane transporter activity);GO:0015105(arsenite transmembrane transporter activity);GO:0015297(antiporter activity);GO:0015699(antimonite transport);GO:0015700(arsenite transport)	ko01230(Biosynthesis of amino acids);ko00270(Cysteine and methionine metabolism);ko00350(Tyrosine metabolism);ko00360(Phenylalanine metabolism);ko00400(Phenylalanine, tyrosine and tryptophan biosynthesis);ko00130(Ubiquinone and other terpenoid-quinone biosynthesis);ko00950(Isoquinoline alkaloid biosynthesis);ko00960(Tropane, piperidine and pyridine alkaloid biosynthesis)	-	ARR3	4	290-311	N
blu-miR40-5'	AGAAAAGAAAAGGGAAGGATT	TRINITY_DN23363_c0_g2	PREDICTED: mitochondrial uncoupling protein 4-like isoform X1 [Juglans regia]	GO:0003735(structural constituent of ribosome);GO:0006412(translation)	-	-	PUMP5	4	1390-1410	N
blu-miR40-5'	AGAAAAGAAAAGGGAAGGATT	TRINITY_DN23382_c1_g2	-	-	-	-	-	3	520-540	N
blu-miR40-5'	AGAAAAGAAAAGGGAAGGATT	TRINITY_DN23484_c2_g2	PREDICTED: uncharacterized protein LOC108999612 [Juglans regia]	GO:0006396(RNA processing);GO:0009507(chloroplast)	-	-	-	4	591-611	N
blu-miR40-5'	AGAAAAGAAAAGGGAAGGATT	TRINITY_DN23543_c1_g5	-	-	-	-	-	4	147-167	N
blu-miR40-5'	AGAAAAGAAAAGGGAAGGATT	TRINITY_DN23559_c0_g8	-	-	-	-	-	3.5	77-98	N
blu-miR40-5'	AGAAAAGAAAAGGGAAGGATT	TRINITY_DN23603_c3_g5	PREDICTED: uncharacterized protein LOC108990498 [Juglans regia]	GO:0016787(hydrolase activity)	-	-	-	4	1606-1626	N
blu-miR40-5'	AGAAAAGAAAAGGGAAGGATT	TRINITY_DN23655_c3_g3	PREDICTED: endonuclease 1-like [Juglans regia]	GO:0000014(single-stranded DNA endodeoxyribonuclease activity);GO:0003676(nucleic acid binding);GO:0005576(extracellular region);GO:0006308(DNA catabolic process);GO:0010150(leaf senescence);GO:0016891(endoribonuclease activity, producing 5'-phosphomonoesters);GO:0043765(T/G mismatch-specific endonuclease activity);GO:0046872(metal ion binding);GO:0080187(floral organ senescence)	-	-	ENDO1	4	552-572	N
blu-miR40-5'	AGAAAAGAAAAGGGAAGGATT	TRINITY_DN23726_c0_g3	-	-	-	-	-	3	180-200	N
blu-miR40-5'	AGAAAAGAAAAGGGAAGGATT	TRINITY_DN23808_c0_g2	-	-	-	-	-	3.5	129-148	N
blu-miR40-5'	AGAAAAGAAAAGGGAAGGATT	TRINITY_DN23840_c4_g1	-	-	-	-	-	4	79-99	N
blu-miR40-5'	AGAAAAGAAAAGGGAAGGATT	TRINITY_DN23968_c0_g4	PREDICTED: dihydroneopterin aldolase 2-like [Juglans regia]	GO:0004150(dihydroneopterin aldolase activity);GO:0005829(cytosol);GO:0006760(folic acid-containing compound metabolic process);GO:0046654(tetrahydrofolate biosynthetic process);GO:0046656(folic acid biosynthetic process)	ko00790(Folate biosynthesis)	-	FOLB2	3	269-289	N
blu-miR40-5'	AGAAAAGAAAAGGGAAGGATT	TRINITY_DN23983_c1_g1	PREDICTED: uncharacterized protein LOC109019461 [Juglans regia]	-	-	-	-	4	308-328	N
blu-miR40-5'	AGAAAAGAAAAGGGAAGGATT	TRINITY_DN24008_c2_g6	PREDICTED: probable rhamnogalacturonate lyase B [Juglans regia]	GO:0005576(extracellular region);GO:0005975(carbohydrate metabolic process);GO:0016829(lyase activity);GO:0030246(carbohydrate binding)	-	-	-	4	1622-1643	N
blu-miR40-5'	AGAAAAGAAAAGGGAAGGATT	TRINITY_DN24055_c1_g6	-	-	-	-	-	4	183-203	N
blu-miR40-5'	AGAAAAGAAAAGGGAAGGATT	TRINITY_DN24100_c0_g3	-	-	-	-	-	3.5	1035-1055	N
blu-miR40-5'	AGAAAAGAAAAGGGAAGGATT	TRINITY_DN24221_c2_g1	-	-	-	-	-	4	52-72	N
blu-miR40-5'	AGAAAAGAAAAGGGAAGGATT	TRINITY_DN24252_c0_g2	hypothetical protein glysoja_046783, partial [Glycine soja]	-	-	-	-	4	274-294	N
blu-miR40-5'	AGAAAAGAAAAGGGAAGGATT	TRINITY_DN24302_c2_g3	PREDICTED: GDSL esterase/lipase At5g45670-like [Juglans regia]	GO:0016298(lipase activity)	ko00561(Glycerolipid metabolism)	-	At5g45670	2.5	17-37	N
blu-miR40-5'	AGAAAAGAAAAGGGAAGGATT	TRINITY_DN24313_c3_g1	-	-	-	-	-	3.5	155-174	N
blu-miR40-5'	AGAAAAGAAAAGGGAAGGATT	TRINITY_DN24379_c0_g2	PREDICTED: uncharacterized protein LOC108995465 isoform X1 [Juglans regia]	GO:0005737(cytoplasm);GO:0006464(cellular protein modification process);GO:0016874(ligase activity)	-	-	-	2	1323-1343	N
blu-miR40-5'	AGAAAAGAAAAGGGAAGGATT	TRINITY_DN24386_c2_g1	-	-	-	-	-	4	189-209	N
blu-miR40-5'	AGAAAAGAAAAGGGAAGGATT	TRINITY_DN24484_c2_g7	-	-	-	-	-	4	260-280	N
blu-miR40-5'	AGAAAAGAAAAGGGAAGGATT	TRINITY_DN24653_c2_g6	PREDICTED: uncharacterized protein LOC108988215 [Juglans regia]	GO:0005794(Golgi apparatus);GO:0016021(integral component of membrane)	-	-	-	3.5	241-260	N
blu-miR40-5'	AGAAAAGAAAAGGGAAGGATT	TRINITY_DN24729_c1_g1	PREDICTED: PITH domain-containing protein 1 [Juglans regia]	GO:0003674(molecular_function);GO:0005634(nucleus);GO:0008150(biological_process)	-	-	DDB_G0277951	3	815-835	N
blu-miR40-5'	AGAAAAGAAAAGGGAAGGATT	TRINITY_DN24740_c0_g3	-	-	-	-	-	4	66-86	N
blu-miR40-5'	AGAAAAGAAAAGGGAAGGATT	TRINITY_DN24821_c12_g1	PREDICTED: dedicator of cytokinesis protein 6 [Fragaria vesca subsp. vesca]	GO:0005089(Rho guanyl-nucleotide exchange factor activity);GO:0005515(protein binding);GO:0005634(nucleus);GO:0005789(endoplasmic reticulum membrane);GO:0005829(cytosol);GO:0005886(plasma membrane);GO:0007264(small GTPase mediated signal transduction);GO:0007275(multicellular organism development);GO:0008064(regulation of actin polymerization or depolymerization);GO:0008360(regulation of cell sha…	-	-	SPK1	4	1610-1630	N
blu-miR40-5'	AGAAAAGAAAAGGGAAGGATT	TRINITY_DN24902_c1_g1	Kinase superfamily protein [Theobroma cacao]	GO:0004674(protein serine/threonine kinase activity);GO:0005524(ATP binding);GO:0005886(plasma membrane);GO:0006468(protein phosphorylation);GO:0016021(integral component of membrane);GO:0016301(kinase activity)	ko04626(Plant-pathogen interaction)	-	PIX7	4	1361-1381	N
blu-miR40-5'	AGAAAAGAAAAGGGAAGGATT	TRINITY_DN24905_c0_g4	PREDICTED: probable protein phosphatase 2C 25 [Juglans regia]	GO:0004722(protein serine/threonine phosphatase activity);GO:0005634(nucleus);GO:0006470(protein dephosphorylation);GO:0009536(plastid);GO:0009611(response to wounding);GO:0009620(response to fungus);GO:0009738(abscisic acid-activated signaling pathway);GO:0046872(metal ion binding);GO:0050832(defense response to fungus)	-	-	At2g30020	4	440-461	N
blu-miR40-5'	AGAAAAGAAAAGGGAAGGATT	TRINITY_DN24937_c3_g5	-	-	-	-	-	4	164-184	N
blu-miR40-5'	AGAAAAGAAAAGGGAAGGATT	TRINITY_DN24965_c2_g6	PREDICTED: RING-H2 finger protein ATL74-like [Nelumbo nucifera]	GO:0010200(response to chitin);GO:0043161(proteasome-mediated ubiquitin-dependent protein catabolic process);GO:0061630(ubiquitin protein ligase activity)	ko00563(Glycosylphosphatidylinositol(GPI)-anchor biosynthesis)	-	ATL10	3.5	1340-1360	N
blu-miR40-5'	AGAAAAGAAAAGGGAAGGATT	TRINITY_DN25305_c2_g2	-	-	-	-	-	4	171-191	N
blu-miR40-5'	AGAAAAGAAAAGGGAAGGATT	TRINITY_DN25348_c3_g1	-	-	-	-	-	4	223-243	N
blu-miR40-5'	AGAAAAGAAAAGGGAAGGATT	TRINITY_DN25610_c2_g2	PREDICTED: TMV resistance protein N-like isoform X1 [Juglans regia]	-	-	-	-	3	151-171	N
blu-miR40-5'	AGAAAAGAAAAGGGAAGGATT	TRINITY_DN25691_c2_g8	-	-	-	-	-	3	168-188	N
blu-miR40-5'	AGAAAAGAAAAGGGAAGGATT	TRINITY_DN25743_c1_g1	-	-	-	-	-	3.5	134-154	N
blu-miR40-5'	AGAAAAGAAAAGGGAAGGATT	TRINITY_DN25865_c2_g4	PREDICTED: probable alpha,alpha-trehalose-phosphate synthase [UDP-forming] 7 [Juglans regia]	GO:0003825(alpha,alpha-trehalose-phosphate synthase (UDP-forming) activity);GO:0004805(trehalose-phosphatase activity);GO:0005634(nucleus);GO:0005829(cytosol);GO:0005992(trehalose biosynthetic process);GO:0016757(transferase activity, transferring glycosyl groups)	ko00500(Starch and sucrose metabolism)	-	TPS7	4	859-880	N
blu-miR40-5'	AGAAAAGAAAAGGGAAGGATT	TRINITY_DN25877_c0_g1	PREDICTED: 5'-3' exoribonuclease 3-like isoform X1 [Juglans regia]	GO:0003676(nucleic acid binding);GO:0004534(5'-3' exoribonuclease activity);GO:0005634(nucleus);GO:0006397(mRNA processing);GO:0008270(zinc ion binding);GO:0010587(miRNA catabolic process)	ko03008(Ribosome biogenesis in eukaryotes);ko03018(RNA degradation)	-	XRN3	4	1127-1147	N
blu-miR40-5'	AGAAAAGAAAAGGGAAGGATT	TRINITY_DN25913_c1_g8	-	-	-	-	-	4	427-447	N
blu-miR40-5'	AGAAAAGAAAAGGGAAGGATT	TRINITY_DN25999_c1_g1	-	-	-	-	-	3.5	165-185	N
blu-miR40-5'	AGAAAAGAAAAGGGAAGGATT	TRINITY_DN26050_c1_g1	PREDICTED: PAP-specific phosphatase HAL2-like [Juglans regia]	GO:0000287(magnesium ion binding);GO:0005737(cytoplasm);GO:0008441(3'(2'),5'-bisphosphate nucleotidase activity)	ko00920(Sulfur metabolism)	-	AHL	3.5	1227-1247	N
blu-miR40-5'	AGAAAAGAAAAGGGAAGGATT	TRINITY_DN26163_c4_g4	PREDICTED: LOB domain-containing protein 38-like isoform X1 [Juglans regia]	GO:0005634(nucleus);GO:0008150(biological_process)	-	-	LBD38	4	754-774	N
blu-miR40-5'	AGAAAAGAAAAGGGAAGGATT	TRINITY_DN26209_c1_g7	-	-	-	-	-	2.5	189-210	N
blu-miR40-5'	AGAAAAGAAAAGGGAAGGATT	TRINITY_DN26219_c1_g6	PREDICTED: protein CURVATURE THYLAKOID 1C, chloroplastic [Juglans regia]	GO:0003674(molecular_function);GO:0008150(biological_process);GO:0009507(chloroplast);GO:0009535(chloroplast thylakoid membrane);GO:0016021(integral component of membrane)	-	-	CURT1C	4	51-71	N
blu-miR40-5'	AGAAAAGAAAAGGGAAGGATT	TRINITY_DN26380_c0_g1	-	-	-	-	-	3.5	456-476	N
blu-miR40-5'	AGAAAAGAAAAGGGAAGGATT	TRINITY_DN26399_c2_g6	-	-	-	-	-	4	54-73	N
blu-miR40-5'	AGAAAAGAAAAGGGAAGGATT	TRINITY_DN26419_c2_g2	-	-	-	-	-	2.5	364-383	N
blu-miR40-5'	AGAAAAGAAAAGGGAAGGATT	TRINITY_DN26439_c4_g2	PREDICTED: eukaryotic initiation factor 4A-2 [Juglans regia]	GO:0004004(ATP-dependent RNA helicase activity);GO:0006413(translational initiation);GO:0010468(regulation of gene expression);GO:0010501(RNA secondary structure unwinding)	ko03013(RNA transport)	-	-	4	1747-1767	N
blu-miR40-5'	AGAAAAGAAAAGGGAAGGATT	TRINITY_DN26587_c2_g1	-	-	-	-	-	3.5	310-330	N
blu-miR40-5'	AGAAAAGAAAAGGGAAGGATT	TRINITY_DN26624_c0_g4	-	-	-	-	-	4	492-512	N
blu-miR40-5'	AGAAAAGAAAAGGGAAGGATT	TRINITY_DN26802_c2_g1	PREDICTED: lysine-specific demethylase JMJ706-like [Juglans regia]	GO:0000792(heterochromatin);GO:0032454(histone demethylase activity (H3-K9 specific));GO:0045815(positive regulation of gene expression, epigenetic);GO:0048439(flower morphogenesis)	-	-	JMJ706	4	3378-3399	N
blu-miR40-5'	AGAAAAGAAAAGGGAAGGATT	TRINITY_DN26824_c0_g1	hypothetical protein POPTR_0032s00200g, partial [Populus trichocarpa]	-	-	-	-	4	339-359	N
blu-miR40-5'	AGAAAAGAAAAGGGAAGGATT	TRINITY_DN26824_c2_g3	PREDICTED: uncharacterized protein LOC108981466 [Juglans regia]	GO:0005887(integral component of plasma membrane);GO:0008553(hydrogen-exporting ATPase activity, phosphorylative mechanism);GO:0043231(intracellular membrane-bounded organelle);GO:0051453(regulation of intracellular pH);GO:1902600(hydrogen ion transmembrane transport)	ko00190(Oxidative phosphorylation)	-	AHA10	4	776-796	N
blu-miR40-5'	AGAAAAGAAAAGGGAAGGATT	TRINITY_DN26900_c0_g1	-	-	-	-	-	4	148-168	N
blu-miR40-5'	AGAAAAGAAAAGGGAAGGATT	TRINITY_DN26959_c3_g1	-	-	-	-	-	3.5	478-498	N
blu-miR40-5'	AGAAAAGAAAAGGGAAGGATT	TRINITY_DN26991_c1_g1	PREDICTED: glutaredoxin-C6-like [Ziziphus jujuba]	GO:0005737(cytoplasm);GO:0009055(electron carrier activity);GO:0015035(protein disulfide oxidoreductase activity);GO:0045454(cell redox homeostasis);GO:0055114(oxidation-reduction process)	-	-	GRXC6	3	490-510	N
blu-miR40-5'	AGAAAAGAAAAGGGAAGGATT	TRINITY_DN27099_c0_g1	-	-	-	-	-	4	38-58	N
blu-miR40-5'	AGAAAAGAAAAGGGAAGGATT	TRINITY_DN27153_c0_g1	PREDICTED: uncharacterized protein LOC108993209 isoform X1 [Juglans regia]	GO:0016787(hydrolase activity)	-	-	-	3.5	2519-2539	N
blu-miR40-5'	AGAAAAGAAAAGGGAAGGATT	TRINITY_DN27246_c1_g1	PREDICTED: probable pectinesterase 68 [Juglans regia]	GO:0005576(extracellular region);GO:0005618(cell wall);GO:0009505(plant-type cell wall);GO:0030599(pectinesterase activity);GO:0042545(cell wall modification);GO:0045330(aspartyl esterase activity);GO:0045490(pectin catabolic process)	ko00040(Pentose and glucuronate interconversions);ko00500(Starch and sucrose metabolism)	-	PME68	2	1171-1191	N
blu-miR40-5'	AGAAAAGAAAAGGGAAGGATT	TRINITY_DN27300_c0_g7	-	-	-	-	-	4	221-241	N
blu-miR40-5'	AGAAAAGAAAAGGGAAGGATT	TRINITY_DN27475_c2_g3	PREDICTED: light-regulated protein [Juglans regia]	GO:0003674(molecular_function);GO:0008150(biological_process);GO:0009507(chloroplast)	ko04144(Endocytosis)	-	LIR1	4	528-549	N
blu-miR40-5'	AGAAAAGAAAAGGGAAGGATT	TRINITY_DN27492_c0_g1	-	-	-	-	-	4	160-180	N
blu-miR40-5'	AGAAAAGAAAAGGGAAGGATT	TRINITY_DN27688_c1_g2	-	-	-	-	-	4	338-358	N
blu-miR40-5'	AGAAAAGAAAAGGGAAGGATT	TRINITY_DN27710_c3_g1	-	-	-	-	-	3.5	217-237	N
blu-miR40-5'	AGAAAAGAAAAGGGAAGGATT	TRINITY_DN27740_c1_g1	hypothetical protein MANES_08G107000 [Manihot esculenta]	GO:0003674(molecular_function);GO:0005737(cytoplasm);GO:0008150(biological_process)	ko01230(Biosynthesis of amino acids);ko00220(Arginine biosynthesis);ko00330(Arginine and proline metabolism)	-	-	4	163-183	N
blu-miR40-5'	AGAAAAGAAAAGGGAAGGATT	TRINITY_DN27863_c0_g3	PREDICTED: myosin-11 [Juglans regia]	-	-	-	-	4	157-177	N
blu-miR40-5'	AGAAAAGAAAAGGGAAGGATT	TRINITY_DN28050_c6_g1	-	-	-	-	-	4	177-197	N
blu-miR40-5'	AGAAAAGAAAAGGGAAGGATT	TRINITY_DN28178_c0_g4	PREDICTED: ras-related protein RABA2a [Juglans regia]	GO:0005768(endosome)	ko04144(Endocytosis)	-	RABA2A	4	788-808	N
blu-miR40-5'	AGAAAAGAAAAGGGAAGGATT	TRINITY_DN28183_c0_g1	PREDICTED: phosphatidylinositol 4-kinase gamma 4-like [Juglans regia]	GO:0004430(1-phosphatidylinositol 4-kinase activity);GO:0004674(protein serine/threonine kinase activity);GO:0005524(ATP binding);GO:0005829(cytosol);GO:0009507(chloroplast);GO:0009651(response to salt stress);GO:0016020(membrane);GO:0016301(kinase activity);GO:0016310(phosphorylation);GO:0016773(phosphotransferase activity, alcohol group as acceptor);GO:0046777(protein autophosphorylation);GO:00…	ko03008(Ribosome biogenesis in eukaryotes)	-	PI4KG4	4	396-417	N
blu-miR40-5'	AGAAAAGAAAAGGGAAGGATT	TRINITY_DN28275_c0_g1	PREDICTED: patellin-3-like [Juglans regia]	GO:0005215(transporter activity);GO:0005634(nucleus);GO:0005829(cytosol);GO:0005886(plasma membrane);GO:0006810(transport);GO:0007049(cell cycle);GO:0008289(lipid binding);GO:0016021(integral component of membrane);GO:0051301(cell division)	-	-	PATL3	3	2079-2099	N
blu-miR40-5'	AGAAAAGAAAAGGGAAGGATT	TRINITY_DN28314_c4_g3	PREDICTED: uncharacterized protein LOC109006864 [Juglans regia]	GO:0042803(protein homodimerization activity)	ko00941(Flavonoid biosynthesis);ko04712(Circadian rhythm - plant)	-	CHS	4	2843-2863	N
blu-miR40-5'	AGAAAAGAAAAGGGAAGGATT	TRINITY_DN28376_c1_g1	-	-	-	-	-	4	626-646	N
blu-miR40-5'	AGAAAAGAAAAGGGAAGGATT	TRINITY_DN28483_c0_g8	-	-	-	-	-	4	39-60	N
blu-miR40-5'	AGAAAAGAAAAGGGAAGGATT	TRINITY_DN28596_c2_g5	-	-	-	-	-	4	46-66	N
blu-miR40-5'	AGAAAAGAAAAGGGAAGGATT	TRINITY_DN28603_c0_g1	-	-	-	-	-	3.5	343-362	N
blu-miR40-5'	AGAAAAGAAAAGGGAAGGATT	TRINITY_DN28720_c0_g3	-	-	-	-	-	4	82-102	N
blu-miR40-5'	AGAAAAGAAAAGGGAAGGATT	TRINITY_DN28745_c1_g8	PREDICTED: dehydration-responsive element-binding protein 3 [Theobroma cacao]	GO:0003677(DNA binding);GO:0003700(transcription factor activity, sequence-specific DNA binding);GO:0005634(nucleus);GO:0006351(transcription, DNA-templated);GO:0006355(regulation of transcription, DNA-templated);GO:0009873(ethylene-activated signaling pathway);GO:0043565(sequence-specific DNA binding);GO:0045893(positive regulation of transcription, DNA-templated)	-	-	DREB3	2.5	313-333	N
blu-miR40-5'	AGAAAAGAAAAGGGAAGGATT	TRINITY_DN28746_c1_g2	PREDICTED: uncharacterized protein LOC109001432 [Juglans regia]	GO:0003700(transcription factor activity, sequence-specific DNA binding);GO:0005515(protein binding);GO:0006355(regulation of transcription, DNA-templated);GO:0009507(chloroplast);GO:0009535(chloroplast thylakoid membrane);GO:0019899(enzyme binding);GO:0042651(thylakoid membrane);GO:0042802(identical protein binding);GO:0043495(protein anchor);GO:1902326(positive regulation of chlorophyll biosynt…	-	-	LIL3.1	4	1346-1366	N
blu-miR40-5'	AGAAAAGAAAAGGGAAGGATT	TRINITY_DN28834_c0_g1	PREDICTED: myb family transcription factor EFM-like [Juglans regia]	GO:0003677(DNA binding);GO:0003700(transcription factor activity, sequence-specific DNA binding);GO:0005634(nucleus);GO:0006351(transcription, DNA-templated);GO:0006355(regulation of transcription, DNA-templated)	ko03013(RNA transport)	-	EFM	4	107-127	N
blu-miR40-5'	AGAAAAGAAAAGGGAAGGATT	TRINITY_DN28921_c3_g2	PREDICTED: polyadenylation and cleavage factor homolog 4 isoform X1 [Juglans regia]	GO:0000993(RNA polymerase II core binding);GO:0003729(mRNA binding);GO:0005737(cytoplasm);GO:0005849(mRNA cleavage factor complex);GO:0006369(termination of RNA polymerase II transcription);GO:0006378(mRNA polyadenylation);GO:0006379(mRNA cleavage)	ko03015(mRNA surveillance pathway)	-	PCFS4	4	3058-3078	N
blu-miR40-5'	AGAAAAGAAAAGGGAAGGATT	TRINITY_DN29042_c0_g2	RAN BINDING protein 1 [Populus trichocarpa]	GO:0000082(G1/S transition of mitotic cell cycle);GO:0005096(GTPase activator activity);GO:0005634(nucleus);GO:0005737(cytoplasm);GO:0005813(centrosome);GO:0006405(RNA export from nucleus);GO:0006511(ubiquitin-dependent protein catabolic process);GO:0006606(protein import into nucleus);GO:0007051(spindle organization);GO:0008536(Ran GTPase binding);GO:0046604(positive regulation of mitotic centro…	-	-	RANBP1B	4	91-111	N
blu-miR40-5'	AGAAAAGAAAAGGGAAGGATT	TRINITY_DN29104_c1_g5	PREDICTED: auxin-responsive protein SAUR32-like [Juglans regia]	GO:0003674(molecular_function);GO:0009733(response to auxin)	ko04075(Plant hormone signal transduction)	-	SAUR32	3.5	483-503	N
blu-miR40-5'	AGAAAAGAAAAGGGAAGGATT	TRINITY_DN29180_c0_g1	PREDICTED: 40S ribosomal protein S9-2 [Eucalyptus grandis]	GO:0003735(structural constituent of ribosome);GO:0019843(rRNA binding);GO:0022627(cytosolic small ribosomal subunit);GO:0045903(positive regulation of translational fidelity)	ko03010(Ribosome)	-	RPS9C	3	909-929	N
blu-miR40-5'	AGAAAAGAAAAGGGAAGGATT	TRINITY_DN29198_c2_g4	PREDICTED: F-box protein At2g39490 [Vitis vinifera]	-	-	-	-	4	27-47	N
blu-miR40-5'	AGAAAAGAAAAGGGAAGGATT	TRINITY_DN29198_c2_g8	-	GO:0005773(vacuole);GO:0005887(integral component of plasma membrane);GO:0009506(plasmodesma);GO:0009992(cellular water homeostasis);GO:0015250(water channel activity);GO:0015254(glycerol channel activity);GO:0034220(ion transmembrane transport)	-	-	PIP2-6	4	83-103	N
blu-miR40-5'	AGAAAAGAAAAGGGAAGGATT	TRINITY_DN29362_c0_g1	PREDICTED: uncharacterized protein LOC109007951 [Juglans regia]	GO:0003674(molecular_function);GO:0005739(mitochondrion);GO:0005768(endosome);GO:0005794(Golgi apparatus);GO:0005802(trans-Golgi network);GO:0008150(biological_process)	-	-	-	3.5	93-113	N
blu-miR40-5'	AGAAAAGAAAAGGGAAGGATT	TRINITY_DN29391_c0_g4	PREDICTED: putative dual specificity protein phosphatase DSP8 [Juglans regia]	GO:0004439(phosphatidylinositol-4,5-bisphosphate 5-phosphatase activity)	-	-	DSP8	4	393-413	N
blu-miR40-5'	AGAAAAGAAAAGGGAAGGATT	TRINITY_DN29417_c10_g1	PREDICTED: EID1-like F-box protein 3 [Pyrus x bretschneideri]	GO:0005634(nucleus);GO:0006970(response to osmotic stress);GO:0009414(response to water deprivation);GO:0009651(response to salt stress);GO:0009737(response to abscisic acid);GO:0009738(abscisic acid-activated signaling pathway);GO:0010029(regulation of seed germination);GO:0010228(vegetative to reproductive phase transition of meristem)	-	-	EDL3	3.5	649-669	N
blu-miR40-5'	AGAAAAGAAAAGGGAAGGATT	TRINITY_DN33573_c0_g1	-	-	-	-	-	4	17-37	N
blu-miR40-5'	AGAAAAGAAAAGGGAAGGATT	TRINITY_DN41895_c0_g1	-	-	-	-	-	4	59-79	N
blu-miR40-5'	AGAAAAGAAAAGGGAAGGATT	TRINITY_DN4231_c0_g1	-	-	-	-	-	3.5	117-138	N
blu-miR40-5'	AGAAAAGAAAAGGGAAGGATT	TRINITY_DN4419_c0_g1	-	-	-	-	-	4	101-121	N
blu-miR40-5'	AGAAAAGAAAAGGGAAGGATT	TRINITY_DN45266_c0_g1	-	-	-	-	-	4	198-218	N
miR1510	TTGTTTTACCTATTCCACCCGT	TRINITY_DN22956_c2_g1	PREDICTED: TMV resistance protein N-like isoform X1 [Juglans regia]	GO:0005737(cytoplasm);GO:0006952(defense response);GO:0007165(signal transduction);GO:0016021(integral component of membrane);GO:0043531(ADP binding)	ko04141(Protein processing in endoplasmic reticulum)	-	TAO1	3.5	74-95	N
miR1510	TTGTTTTACCTATTCCACCCGT	TRINITY_DN22999_c5_g3	PREDICTED: TMV resistance protein N-like isoform X1 [Juglans regia]	GO:0005515(protein binding)	ko00500(Starch and sucrose metabolism)	-	-	4	614-635	N
miR1510	TTGTTTTACCTATTCCACCCGT	TRINITY_DN22999_c5_g6	PREDICTED: TMV resistance protein N-like isoform X2 [Juglans regia]	GO:0005515(protein binding)	ko03040(Spliceosome);ko04141(Protein processing in endoplasmic reticulum);ko04144(Endocytosis)	-	-	4	319-340	N
miR1510	TTGTTTTACCTATTCCACCCGT	TRINITY_DN23142_c1_g1	PREDICTED: TMV resistance protein N-like [Juglans regia]	GO:0005737(cytoplasm);GO:0006952(defense response);GO:0007165(signal transduction);GO:0016021(integral component of membrane);GO:0043531(ADP binding)	ko03040(Spliceosome);ko04141(Protein processing in endoplasmic reticulum);ko04144(Endocytosis)	-	At4g11170	0.5	54-75	N
miR1510	TTGTTTTACCTATTCCACCCGT	TRINITY_DN23142_c1_g2	PREDICTED: TMV resistance protein N-like [Juglans regia]	GO:0005737(cytoplasm);GO:0006952(defense response);GO:0007165(signal transduction);GO:0016021(integral component of membrane);GO:0043531(ADP binding)	ko00500(Starch and sucrose metabolism)	-	-	0.5	203-224	N
miR1510	TTGTTTTACCTATTCCACCCGT	TRINITY_DN23142_c1_g4	TIR-NBS-LRR type disease resistance protein [Populus trichocarpa]	GO:0005737(cytoplasm);GO:0006952(defense response);GO:0007165(signal transduction);GO:0016021(integral component of membrane);GO:0043531(ADP binding)	ko03040(Spliceosome);ko04141(Protein processing in endoplasmic reticulum);ko04144(Endocytosis)	-	-	1.5	18-39	N
miR1510	TTGTTTTACCTATTCCACCCGT	TRINITY_DN23931_c3_g1	PREDICTED: TMV resistance protein N-like [Juglans regia]	GO:0005515(protein binding)	ko03040(Spliceosome);ko04141(Protein processing in endoplasmic reticulum);ko04144(Endocytosis)	-	-	4	195-216	N
miR1510	TTGTTTTACCTATTCCACCCGT	TRINITY_DN23999_c0_g4	PREDICTED: RNA polymerase II C-terminal domain phosphatase-like 2 isoform X1 [Juglans regia]	GO:0008420(CTD phosphatase activity);GO:0016591(DNA-directed RNA polymerase II, holoenzyme);GO:0070940(dephosphorylation of RNA polymerase II C-terminal domain)	-	-	CPL2	4	2150-2172	N
miR1510	TTGTTTTACCTATTCCACCCGT	TRINITY_DN24421_c4_g1	PREDICTED: TMV resistance protein N-like [Juglans regia]	GO:0005515(protein binding)	ko00500(Starch and sucrose metabolism)	-	-	4	553-574	N
miR1510	TTGTTTTACCTATTCCACCCGT	TRINITY_DN24485_c1_g1	PREDICTED: TMV resistance protein N-like [Juglans regia]	GO:0005515(protein binding)	ko03040(Spliceosome);ko04141(Protein processing in endoplasmic reticulum);ko04144(Endocytosis)	-	-	3	251-272	N
miR1510	TTGTTTTACCTATTCCACCCGT	TRINITY_DN24485_c1_g2	PREDICTED: TMV resistance protein N-like [Juglans regia]	GO:0005737(cytoplasm);GO:0006952(defense response);GO:0007165(signal transduction);GO:0016021(integral component of membrane);GO:0043531(ADP binding)	ko03040(Spliceosome);ko04141(Protein processing in endoplasmic reticulum);ko04144(Endocytosis)	-	-	0.5	202-223	N
miR1510	TTGTTTTACCTATTCCACCCGT	TRINITY_DN25610_c2_g1	PREDICTED: TMV resistance protein N-like [Juglans regia]	GO:0005737(cytoplasm);GO:0006952(defense response);GO:0007165(signal transduction);GO:0016021(integral component of membrane);GO:0043531(ADP binding)	ko00500(Starch and sucrose metabolism)	-	-	2.5	270-291	N
miR1510	TTGTTTTACCTATTCCACCCGT	TRINITY_DN25610_c2_g4	PREDICTED: TMV resistance protein N-like [Juglans regia]	GO:0005737(cytoplasm);GO:0006952(defense response);GO:0007165(signal transduction);GO:0016021(integral component of membrane);GO:0043531(ADP binding)	ko00500(Starch and sucrose metabolism)	-	-	2.5	83-104	N
miR1510	TTGTTTTACCTATTCCACCCGT	TRINITY_DN25909_c2_g3	PREDICTED: TMV resistance protein N-like [Juglans regia]	GO:0005737(cytoplasm);GO:0006952(defense response);GO:0007165(signal transduction);GO:0009506(plasmodesma);GO:0009507(chloroplast);GO:0016021(integral component of membrane);GO:0043531(ADP binding)	ko03040(Spliceosome);ko04141(Protein processing in endoplasmic reticulum);ko04144(Endocytosis)	-	-	4	78-99	N
miR1510	TTGTTTTACCTATTCCACCCGT	TRINITY_DN27906_c2_g2	PREDICTED: TMV resistance protein N-like isoform X1 [Juglans regia]	GO:0005737(cytoplasm);GO:0006952(defense response);GO:0007165(signal transduction);GO:0016021(integral component of membrane);GO:0043531(ADP binding)	ko03040(Spliceosome);ko04141(Protein processing in endoplasmic reticulum);ko04144(Endocytosis)	-	RPP4	4	144-165	N
miR1511a	ACCTGGCTCTGATACCATAAC	TRINITY_DN24995_c1_g2	PREDICTED: uncharacterized protein LOC108995897 [Juglans regia]	GO:0003674(molecular_function);GO:0005634(nucleus);GO:0008150(biological_process)	-	-	JASON	4	306-325	N
miR1511a	ACCTGGCTCTGATACCATAAC	TRINITY_DN25236_c1_g1	-	-	-	-	-	4	246-266	N
miR1511a	ACCTGGCTCTGATACCATAAC	TRINITY_DN25588_c0_g5	-	-	-	-	-	3	239-259	N
miR1511b	ACCCAGGCTCTGATACCATGA	TRINITY_DN23535_c2_g4	PREDICTED: ribosomal RNA-processing protein 14-C-like [Juglans regia]	-	-	-	-	3	114-135	N
miR1511b	ACCCAGGCTCTGATACCATGA	TRINITY_DN23578_c3_g7	-	-	-	-	-	3	230-250	N
miR156f	ATGACAGAAGATAGAGAGCAC	TRINITY_DN21657_c0_g1	-	-	-	-	-	2	148-168	N
miR156f	ATGACAGAAGATAGAGAGCAC	TRINITY_DN23150_c0_g2	PREDICTED: squamosa promoter-binding-like protein 12 [Juglans regia]	-	-	-	-	4	29-49	N
miR156f	ATGACAGAAGATAGAGAGCAC	TRINITY_DN24146_c1_g2	Pentatricopeptide repeat-containing, chloroplastic -like protein [Gossypium arboreum]	GO:0009507(chloroplast);GO:0009793(embryo development ending in seed dormancy);GO:0010468(regulation of gene expression)	-	-	DG1	4	761-780	N
miR156f	ATGACAGAAGATAGAGAGCAC	TRINITY_DN24176_c2_g2	-	-	-	-	-	4	375-395	N
miR156f	ATGACAGAAGATAGAGAGCAC	TRINITY_DN26134_c5_g1	PREDICTED: teosinte glume architecture 1-like [Juglans regia]	GO:0003677(DNA binding);GO:0003700(transcription factor activity, sequence-specific DNA binding);GO:0005634(nucleus);GO:0006351(transcription, DNA-templated);GO:0006355(regulation of transcription, DNA-templated);GO:0046872(metal ion binding);GO:0048653(anther development)	-	-	SPL13A	2	1218-1238	N
miR156f	ATGACAGAAGATAGAGAGCAC	TRINITY_DN27088_c0_g2	squamosa promoter binding like-protein [Betula pendula]	-	-	-	-	4	162-182	N
miR156f	ATGACAGAAGATAGAGAGCAC	TRINITY_DN27488_c0_g3	PREDICTED: uncharacterized protein LOC18606804 [Theobroma cacao]	GO:0003674(molecular_function);GO:0005739(mitochondrion);GO:0008150(biological_process);GO:0016021(integral component of membrane)	-	-	-	3	691-711	N
miR156f	ATGACAGAAGATAGAGAGCAC	TRINITY_DN36701_c0_g1	-	-	-	-	-	3	113-133	N
miR156j-3'	GCTCTCTATGCTTCTGTCATC	TRINITY_DN1428_c0_g1	-	-	-	-	-	3	273-292	N
miR156j-3'	GCTCTCTATGCTTCTGTCATC	TRINITY_DN21657_c0_g1	-	-	-	-	-	3	86-105	N
miR156j-3'	GCTCTCTATGCTTCTGTCATC	TRINITY_DN24110_c0_g2	Uncharacterized protein TCM_025447 [Theobroma cacao]	-	-	-	-	3.5	25-46	N
miR156j-3'	GCTCTCTATGCTTCTGTCATC	TRINITY_DN25168_c0_g4	PREDICTED: uncharacterized protein LOC109002886 [Juglans regia]	GO:0003674(molecular_function);GO:0005575(cellular_component);GO:0008150(biological_process)	-	-	-	4	1218-1238	N
miR156j-3'	GCTCTCTATGCTTCTGTCATC	TRINITY_DN25729_c0_g4	PREDICTED: uncharacterized protein LOC109008504 isoform X5 [Juglans regia]	GO:0007165(signal transduction);GO:0016020(membrane)	-	-	-	4	249-268	N
miR156j-3'	GCTCTCTATGCTTCTGTCATC	TRINITY_DN27221_c1_g1	PREDICTED: ubiquitin-activating enzyme E1 1-like isoform X1 [Juglans regia]	GO:0004839(ubiquitin activating enzyme activity);GO:0004842(ubiquitin-protein transferase activity);GO:0005634(nucleus);GO:0005829(cytosol);GO:0019941(modification-dependent protein catabolic process)	ko04120(Ubiquitin mediated proteolysis)	-	UBA1	4	954-973	N
miR156j-3'	GCTCTCTATGCTTCTGTCATC	TRINITY_DN28793_c1_g6	PREDICTED: uncharacterized protein LOC109001776 [Juglans regia]	GO:0005634(nucleus);GO:0008150(biological_process)	-	-	-	4	426-446	N
miR156j-3'	GCTCTCTATGCTTCTGTCATC	TRINITY_DN28820_c0_g3	PREDICTED: bax inhibitor 1-like [Juglans regia]	GO:0000038(very long-chain fatty acid metabolic process);GO:0005515(protein binding);GO:0005635(nuclear envelope);GO:0005737(cytoplasm);GO:0005783(endoplasmic reticulum);GO:0005789(endoplasmic reticulum membrane);GO:0005886(plasma membrane);GO:0006915(apoptotic process);GO:0006983(ER overload response);GO:0009414(response to water deprivation);GO:0016021(integral component of membrane);GO:0043069…	-	-	BI-1	4	668-687	N
miR156j-3'	GCTCTCTATGCTTCTGTCATC	TRINITY_DN29260_c1_g1	PREDICTED: CCR4-NOT transcription complex subunit 1-like isoform X1 [Juglans regia]	GO:0000288(nuclear-transcribed mRNA catabolic process, deadenylation-dependent decay);GO:0000932(cytoplasmic mRNA processing body);GO:0017148(negative regulation of translation);GO:0030015(CCR4-NOT core complex);GO:0032947(protein complex scaffold)	ko03018(RNA degradation)	-	cnot1	3.5	4408-4427	N
miR164a	TGGAGAAGCAGGGCACGTGCA	TRINITY_DN22966_c2_g2	predicted protein [Hordeum vulgare subsp. vulgare]	GO:0004586(ornithine decarboxylase activity);GO:0005737(cytoplasm);GO:0033387(putrescine biosynthetic process from ornithine)	ko00330(Arginine and proline metabolism);ko00480(Glutathione metabolism)	-	ODC1	4	223-242	N
miR164a	TGGAGAAGCAGGGCACGTGCA	TRINITY_DN23514_c0_g1	ubiquitin, partial [Cymbidium faberi]	GO:0003735(structural constituent of ribosome);GO:0005634(nucleus);GO:0005794(Golgi apparatus);GO:0005886(plasma membrane);GO:0006412(translation);GO:0009506(plasmodesma);GO:0022627(cytosolic small ribosomal subunit);GO:0042787(protein ubiquitination involved in ubiquitin-dependent protein catabolic process);GO:0046872(metal ion binding)	ko03010(Ribosome)	-	RPS27AA	4	201-220	N
miR164a	TGGAGAAGCAGGGCACGTGCA	TRINITY_DN24968_c0_g2	NAC domain-containing protein 1 [Betula luminifera]	GO:0003677(DNA binding);GO:0003700(transcription factor activity, sequence-specific DNA binding);GO:0005634(nucleus);GO:0006351(transcription, DNA-templated);GO:0006355(regulation of transcription, DNA-templated);GO:0007275(multicellular organism development)	-	-	NAC079	2.5	267-287	N
miR164a	TGGAGAAGCAGGGCACGTGCA	TRINITY_DN25353_c0_g4	PREDICTED: UDP-glucuronic acid decarboxylase 6 [Juglans regia]	GO:0003824(catalytic activity);GO:0005829(cytosol);GO:0005886(plasma membrane);GO:0009225(nucleotide-sugar metabolic process);GO:0033320(UDP-D-xylose biosynthetic process);GO:0042732(D-xylose metabolic process);GO:0048040(UDP-glucuronate decarboxylase activity)	ko00500(Starch and sucrose metabolism);ko00520(Amino sugar and nucleotide sugar metabolism)	-	UXS5	4	470-490	N
miR164a	TGGAGAAGCAGGGCACGTGCA	TRINITY_DN27641_c0_g6	hypothetical protein POPTR_0019s14040g [Populus trichocarpa]	GO:0003674(molecular_function);GO:0005634(nucleus);GO:0009611(response to wounding)	-	-	-	4	167-187	N
miR164a	TGGAGAAGCAGGGCACGTGCA	TRINITY_DN29315_c2_g1	PREDICTED: clustered mitochondria protein [Juglans regia]	GO:0000266(mitochondrial fission);GO:0000281(mitotic cytokinesis);GO:0005737(cytoplasm);GO:0007005(mitochondrion organization);GO:0008053(mitochondrial fusion);GO:0048312(intracellular distribution of mitochondria)	-	-	FMT	4	15-35	N
miR167b-3'	AGATCATGTGGCAGTTTCACC	TRINITY_DN24418_c0_g2	-	-	-	-	-	4	87-106	N
miR167b-3'	AGATCATGTGGCAGTTTCACC	TRINITY_DN45989_c0_g1	-	-	-	-	-	3.5	71-92	N
miR169b	TGAGCCAAGAATGACTTGCC	TRINITY_DN23329_c3_g6	PREDICTED: protein CHROMATIN REMODELING 8 isoform X1 [Juglans regia]	GO:0003677(DNA binding);GO:0004386(helicase activity);GO:0005524(ATP binding);GO:0005634(nucleus);GO:0006281(DNA repair);GO:0006351(transcription, DNA-templated);GO:0006355(regulation of transcription, DNA-templated);GO:0006974(cellular response to DNA damage stimulus);GO:0010332(response to gamma radiation)	ko03420(Nucleotide excision repair)	-	CHR8	4	987-1005	N
miR169b	TGAGCCAAGAATGACTTGCC	TRINITY_DN23620_c1_g1	PREDICTED: uncharacterized protein LOC109012827 [Juglans regia]	GO:0016787(hydrolase activity)	-	-	-	4	1322-1340	N
miR169b	TGAGCCAAGAATGACTTGCC	TRINITY_DN26356_c1_g3	PREDICTED: TATA-binding protein-associated factor BTAF1 [Juglans regia]	GO:0005524(ATP binding);GO:0005654(nucleoplasm);GO:0035562(negative regulation of chromatin binding)	-	-	BTAF1	4	1869-1888	N
miR169b	TGAGCCAAGAATGACTTGCC	TRINITY_DN26385_c0_g3	PREDICTED: probable indole-3-acetic acid-amido synthetase GH3.6 [Juglans regia]	GO:0009416(response to light stimulus);GO:0009733(response to auxin)	ko04075(Plant hormone signal transduction)	-	GH3.6	3	421-440	N
miR169b	TGAGCCAAGAATGACTTGCC	TRINITY_DN26565_c0_g1	PREDICTED: uncharacterized protein LOC108995050 [Juglans regia]	GO:0005634(nucleus);GO:0008150(biological_process);GO:0008270(zinc ion binding);GO:0009506(plasmodesma)	-	-	-	3.5	2621-2639	N
miR171b	TTTGTTGAGCCGCGCCAA	TRINITY_DN12040_c0_g1	-	GO:0072562(blood microparticle)	-	-	Gripap1	4	176-193	N
miR171b	TTTGTTGAGCCGCGCCAA	TRINITY_DN22710_c0_g2	PREDICTED: E3 ubiquitin-protein ligase RING1-like isoform X1 [Juglans regia]	GO:0000209(protein polyubiquitination);GO:0042787(protein ubiquitination involved in ubiquitin-dependent protein catabolic process);GO:0043161(proteasome-mediated ubiquitin-dependent protein catabolic process);GO:0061630(ubiquitin protein ligase activity)	ko03013(RNA transport)	-	RHC1A	4	718-736	N
miR171b	TTTGTTGAGCCGCGCCAA	TRINITY_DN25384_c0_g3	PREDICTED: uncharacterized protein At1g51745-like isoform X1 [Juglans regia]	GO:0003674(molecular_function);GO:0005634(nucleus);GO:0008150(biological_process)	-	-	At1g51745	4	1181-1198	N
miR171b	TTTGTTGAGCCGCGCCAA	TRINITY_DN25527_c1_g4	PREDICTED: beta-galactosidase 5-like [Juglans regia]	GO:0004565(beta-galactosidase activity);GO:0005618(cell wall);GO:0005773(vacuole)	ko00052(Galactose metabolism);ko00600(Sphingolipid metabolism);ko00531(Glycosaminoglycan degradation);ko00604(Glycosphingolipid biosynthesis - ganglio series);ko00511(Other glycan degradation)	-	BGAL5	4	347-364	N
miR171b	TTTGTTGAGCCGCGCCAA	TRINITY_DN25569_c1_g5	hypothetical protein PRUPE_ppa000282mg [Prunus persica]	GO:0000166(nucleotide binding);GO:0005515(protein binding);GO:0009793(embryo development ending in seed dormancy);GO:0016049(cell growth);GO:0031929(TOR signaling);GO:0031931(TORC1 complex);GO:0040008(regulation of growth);GO:0080008(Cul4-RING E3 ubiquitin ligase complex)	-	-	RAPTOR1	4	1285-1303	N
miR171b	TTTGTTGAGCCGCGCCAA	TRINITY_DN25650_c1_g19	predicted protein [Hordeum vulgare subsp. vulgare]	GO:0005388(calcium-transporting ATPase activity);GO:0005887(integral component of plasma membrane);GO:0006874(cellular calcium ion homeostasis);GO:0033017(sarcoplasmic reticulum membrane)	ko00190(Oxidative phosphorylation)	-	Ca-P60A	4	2002-2018	N
miR171b	TTTGTTGAGCCGCGCCAA	TRINITY_DN26049_c2_g1	-	-	-	-	-	4	146-164	N
miR171b	TTTGTTGAGCCGCGCCAA	TRINITY_DN26301_c0_g3	PREDICTED: proline-rich receptor-like protein kinase PERK13 [Juglans regia]	GO:0003674(molecular_function);GO:0008150(biological_process);GO:0009507(chloroplast);GO:0016021(integral component of membrane)	-	-	-	4	28-44	N
miR171b	TTTGTTGAGCCGCGCCAA	TRINITY_DN26399_c2_g2	PREDICTED: uncharacterized protein LOC108979904 [Juglans regia]	GO:0003674(molecular_function);GO:0005576(extracellular region);GO:0005886(plasma membrane);GO:0008150(biological_process);GO:0016021(integral component of membrane)	-	-	-	4	415-431	N
miR171b	TTTGTTGAGCCGCGCCAA	TRINITY_DN26673_c1_g1	PREDICTED: rac-like GTP-binding protein RHO1 [Theobroma cacao]	GO:0005515(protein binding);GO:0005525(GTP binding);GO:0005634(nucleus);GO:0005737(cytoplasm);GO:0005819(spindle);GO:0005886(plasma membrane);GO:0007264(small GTPase mediated signal transduction);GO:0009524(phragmoplast);GO:0009734(auxin-activated signaling pathway);GO:0009738(abscisic acid-activated signaling pathway);GO:0015031(protein transport)	ko00940(Phenylpropanoid biosynthesis)	-	RHO1	3.5	10-26	N
miR171b	TTTGTTGAGCCGCGCCAA	TRINITY_DN26700_c0_g4	-	-	-	-	-	4	360-377	N
miR171b	TTTGTTGAGCCGCGCCAA	TRINITY_DN28131_c2_g2	PREDICTED: scarecrow-like protein 27 [Juglans regia]	GO:0003700(transcription factor activity, sequence-specific DNA binding);GO:0005634(nucleus);GO:0006355(regulation of transcription, DNA-templated);GO:0010492(maintenance of shoot apical meristem identity);GO:0043565(sequence-specific DNA binding);GO:0048768(root hair cell tip growth);GO:0051301(cell division)	ko04075(Plant hormone signal transduction)	-	SCL6	4	1147-1164	N
miR171b	TTTGTTGAGCCGCGCCAA	TRINITY_DN28131_c2_g4	PREDICTED: scarecrow-like protein 22 [Malus domestica]	GO:0003700(transcription factor activity, sequence-specific DNA binding);GO:0005634(nucleus);GO:0006355(regulation of transcription, DNA-templated);GO:0010492(maintenance of shoot apical meristem identity);GO:0043565(sequence-specific DNA binding);GO:0048768(root hair cell tip growth);GO:0051301(cell division)	-	-	SCL6	4	163-180	N
miR171b	TTTGTTGAGCCGCGCCAA	TRINITY_DN28968_c2_g3	4-coumarate coenzyme A ligase [Betula luminifera]	GO:0005524(ATP binding);GO:0005634(nucleus);GO:0005737(cytoplasm);GO:0008152(metabolic process);GO:0009411(response to UV);GO:0009611(response to wounding);GO:0009620(response to fungus);GO:0009698(phenylpropanoid metabolic process);GO:0016207(4-coumarate-CoA ligase activity);GO:0016874(ligase activity)	ko00360(Phenylalanine metabolism);ko00130(Ubiquinone and other terpenoid-quinone biosynthesis);ko00940(Phenylpropanoid biosynthesis)	-	4CL2	3.5	1696-1713	N
miR171b	TTTGTTGAGCCGCGCCAA	TRINITY_DN29424_c8_g1	PREDICTED: TMV resistance protein N-like [Juglans regia]	-	-	-	-	4	113-130	N
miR171b	TTTGTTGAGCCGCGCCAA	TRINITY_DN33580_c0_g1	-	-	-	-	-	3.5	174-191	N
miR171j-5'	AGATGTTGGTACGGTTCAATC	TRINITY_DN23047_c3_g7	-	-	-	-	-	4	58-78	N
miR172e-5'	GCAGCATCATCAAGATTCACA	TRINITY_DN20278_c0_g1	hypothetical protein POPTR_0016s05640g [Populus trichocarpa]	GO:0003674(molecular_function);GO:0005576(extracellular region);GO:0008150(biological_process)	-	-	-	3	76-95	N
miR172e-5'	GCAGCATCATCAAGATTCACA	TRINITY_DN22780_c0_g1	PREDICTED: putative threonine aspartase isoform X1 [Juglans regia]	GO:0004298(threonine-type endopeptidase activity);GO:0006508(proteolysis);GO:0016787(hydrolase activity);GO:0033345(asparagine catabolic process via L-aspartate);GO:0051604(protein maturation)	-	-	At4g00590	4	650-670	N
miR172e-5'	GCAGCATCATCAAGATTCACA	TRINITY_DN23123_c1_g3	PREDICTED: DNA ligase 6 isoform X1 [Juglans regia]	GO:0003910(DNA ligase (ATP) activity);GO:0005737(cytoplasm);GO:0006273(lagging strand elongation);GO:0051103(DNA ligation involved in DNA repair)	ko03030(DNA replication);ko03410(Base excision repair);ko03420(Nucleotide excision repair);ko03430(Mismatch repair)	-	LIG6	4	683-702	N
miR172e-5'	GCAGCATCATCAAGATTCACA	TRINITY_DN23183_c4_g3	PREDICTED: small RNA degrading nuclease 5 isoform X1 [Juglans regia]	GO:0003676(nucleic acid binding);GO:0004527(exonuclease activity);GO:0005622(intracellular);GO:0005634(nucleus)	ko03008(Ribosome biogenesis in eukaryotes)	-	SDN5	4	1282-1302	N
miR172e-5'	GCAGCATCATCAAGATTCACA	TRINITY_DN23210_c0_g1	PREDICTED: uncharacterized protein LOC109006835 [Juglans regia]	-	-	-	-	3	4-24	N
miR172e-5'	GCAGCATCATCAAGATTCACA	TRINITY_DN23229_c5_g2	PREDICTED: leucine--tRNA ligase, chloroplastic/mitochondrial [Juglans regia]	GO:0004823(leucine-tRNA ligase activity);GO:0005739(mitochondrion);GO:0005829(cytosol);GO:0006429(leucyl-tRNA aminoacylation)	ko00970(Aminoacyl-tRNA biosynthesis)	-	EMB2369	3.5	361-381	N
miR172e-5'	GCAGCATCATCAAGATTCACA	TRINITY_DN23416_c1_g2	PREDICTED: uncharacterized protein At2g29880-like [Populus euphratica]	-	-	-	-	4	657-677	N
miR172e-5'	GCAGCATCATCAAGATTCACA	TRINITY_DN24118_c0_g5	PREDICTED: DNA-directed RNA polymerase III subunit RPC5 isoform X2 [Juglans regia]	GO:0001056(RNA polymerase III activity);GO:0005666(DNA-directed RNA polymerase III complex)	ko00230(Purine metabolism);ko00240(Pyrimidine metabolism);ko03020(RNA polymerase)	-	-	3.5	1574-1594	N
miR172e-5'	GCAGCATCATCAAGATTCACA	TRINITY_DN24257_c0_g4	PREDICTED: G-type lectin S-receptor-like serine/threonine-protein kinase At1g11410 isoform X1 [Juglans regia]	GO:0004674(protein serine/threonine kinase activity);GO:0005886(plasma membrane);GO:0006468(protein phosphorylation);GO:0006952(defense response);GO:0009506(plasmodesma)	-	-	-	3	135-155	N
miR172e-5'	GCAGCATCATCAAGATTCACA	TRINITY_DN24740_c0_g4	PREDICTED: glutamic acid-rich protein [Juglans regia]	GO:0003674(molecular_function);GO:0005634(nucleus);GO:0008150(biological_process)	-	-	-	4	1147-1166	N
miR172e-5'	GCAGCATCATCAAGATTCACA	TRINITY_DN24771_c0_g1	PREDICTED: zinc finger CCCH domain-containing protein 24-like [Juglans regia]	GO:0000166(nucleotide binding);GO:0003676(nucleic acid binding);GO:0003677(DNA binding);GO:0005634(nucleus);GO:0006396(RNA processing);GO:0008173(RNA methyltransferase activity);GO:0046872(metal ion binding)	-	-	At2g28450	3.5	55-75	N
miR172e-5'	GCAGCATCATCAAGATTCACA	TRINITY_DN26125_c0_g1	PREDICTED: TPD1 protein homolog 1-like [Juglans regia]	GO:0003674(molecular_function);GO:0005576(extracellular region);GO:0009408(response to heat)	-	-	TDL1	4	1128-1148	N
miR172e-5'	GCAGCATCATCAAGATTCACA	TRINITY_DN26129_c0_g1	PREDICTED: BSD domain-containing protein 1 [Juglans regia]	GO:0003674(molecular_function);GO:0005737(cytoplasm);GO:0008150(biological_process)	ko00940(Phenylpropanoid biosynthesis);ko00945(Stilbenoid, diarylheptanoid and gingerol biosynthesis);ko00941(Flavonoid biosynthesis)	-	SALAT	3.5	1037-1056	N
miR172e-5'	GCAGCATCATCAAGATTCACA	TRINITY_DN26707_c1_g3	PREDICTED: aldehyde dehydrogenase family 2 member C4-like isoform X1 [Juglans regia]	GO:0004029(aldehyde dehydrogenase (NAD) activity)	ko00940(Phenylpropanoid biosynthesis)	-	ALDH2C4	3.5	862-882	N
miR172e-5'	GCAGCATCATCAAGATTCACA	TRINITY_DN26913_c3_g2	PREDICTED: chaperonin CPN60-2, mitochondrial [Juglans regia]	GO:0005507(copper ion binding);GO:0005524(ATP binding);GO:0005739(mitochondrion);GO:0005759(mitochondrial matrix);GO:0005774(vacuolar membrane);GO:0005794(Golgi apparatus);GO:0005829(cytosol);GO:0007005(mitochondrion organization);GO:0009408(response to heat);GO:0022626(cytosolic ribosome);GO:0042026(protein refolding);GO:0046686(response to cadmium ion);GO:0051131(chaperone-mediated protein comp…	ko03018(RNA degradation)	-	CPN60-2	4	1042-1062	N
miR172e-5'	GCAGCATCATCAAGATTCACA	TRINITY_DN26966_c2_g1	PREDICTED: uncharacterized protein LOC109006023 [Juglans regia]	GO:0003674(molecular_function);GO:0005634(nucleus);GO:0008150(biological_process)	-	-	PUB62	4	578-597	N
miR172e-5'	GCAGCATCATCAAGATTCACA	TRINITY_DN28394_c2_g1	phenylalanine ammonia-lyase 1 [Betula platyphylla]	GO:0005515(protein binding);GO:0005737(cytoplasm);GO:0006559(L-phenylalanine catabolic process);GO:0006952(defense response);GO:0006979(response to oxidative stress);GO:0009555(pollen development);GO:0009611(response to wounding);GO:0009699(phenylpropanoid biosynthetic process);GO:0009800(cinnamic acid biosynthetic process);GO:0009819(drought recovery);GO:0010224(response to UV-B);GO:0045548(phen…	ko00360(Phenylalanine metabolism);ko00940(Phenylpropanoid biosynthesis)	-	PAL	4	324-344	N
miR172e-5'	GCAGCATCATCAAGATTCACA	TRINITY_DN29011_c0_g3	PREDICTED: receptor-like serine/threonine-protein kinase SD1-8 [Juglans regia]	GO:0004674(protein serine/threonine kinase activity);GO:0005886(plasma membrane);GO:0006468(protein phosphorylation);GO:0006952(defense response);GO:0009506(plasmodesma);GO:0031625(ubiquitin protein ligase binding)	ko00520(Amino sugar and nucleotide sugar metabolism)	-	SD18	4	57-76	N
miR2111a	TAATCTGCATCCTGAGGTTTA	TRINITY_DN24714_c1_g2	PREDICTED: 40S ribosomal protein S20-1 [Phoenix dactylifera]	GO:0003735(structural constituent of ribosome);GO:0022627(cytosolic small ribosomal subunit)	ko03010(Ribosome)	-	RPS20B	3.5	122-141	N
miR2111a	TAATCTGCATCCTGAGGTTTA	TRINITY_DN25033_c0_g2	PREDICTED: elongation factor G-2, mitochondrial [Juglans regia]	GO:0003746(translation elongation factor activity);GO:0003924(GTPase activity);GO:0005739(mitochondrion);GO:0070125(mitochondrial translational elongation)	ko03008(Ribosome biogenesis in eukaryotes)	-	MEFG2	4	8-28	N
miR2111a	TAATCTGCATCCTGAGGTTTA	TRINITY_DN27273_c0_g1	PREDICTED: cell division cycle 20.2, cofactor of APC complex-like [Juglans regia]	GO:0004871(signal transducer activity);GO:0005515(protein binding);GO:0005634(nucleus);GO:0005834(heterotrimeric G-protein complex);GO:0007067(mitotic nuclear division);GO:0007165(signal transduction);GO:0010997(anaphase-promoting complex binding);GO:0016567(protein ubiquitination);GO:0019900(kinase binding);GO:0033597(mitotic checkpoint complex);GO:0051301(cell division);GO:0097027(ubiquitin-pro…	ko04120(Ubiquitin mediated proteolysis)	-	CDC20-1	4	1593-1613	N
miR2199	TGATACACTAGCACGGGTCAC	TRINITY_DN26913_c3_g3	PREDICTED: chaperonin CPN60-2, mitochondrial-like [Juglans regia]	GO:0005507(copper ion binding);GO:0005524(ATP binding);GO:0005739(mitochondrion);GO:0005759(mitochondrial matrix);GO:0005774(vacuolar membrane);GO:0005794(Golgi apparatus);GO:0005829(cytosol);GO:0007005(mitochondrion organization);GO:0009408(response to heat);GO:0022626(cytosolic ribosome);GO:0042026(protein refolding);GO:0046686(response to cadmium ion);GO:0051131(chaperone-mediated protein comp…	ko03018(RNA degradation)	-	CPN60-2	3.5	985-1004	N
miR319b-5'	AGAGCTCTCTTCAGTCCATTC	TRINITY_DN23158_c1_g14	hypothetical protein SELMODRAFT_94768 [Selaginella moellendorffii]	GO:0001891(phagocytic cup);GO:0002250(adaptive immune response);GO:0002548(monocyte chemotaxis);GO:0002685(regulation of leukocyte migration);GO:0005509(calcium ion binding);GO:0005544(calcium-dependent phospholipid binding);GO:0005615(extracellular space);GO:0005634(nucleus);GO:0005829(cytosol);GO:0006909(phagocytosis);GO:0006954(inflammatory response);GO:0007187(G-protein coupled receptor signa…	-	-	ANXA1	4	469-488	N
miR319b-5'	AGAGCTCTCTTCAGTCCATTC	TRINITY_DN24941_c1_g4	PREDICTED: uncharacterized protein LOC109009083 [Juglans regia]	GO:0003674(molecular_function);GO:0005634(nucleus);GO:0008150(biological_process)	ko00500(Starch and sucrose metabolism);ko00520(Amino sugar and nucleotide sugar metabolism)	-	-	3.5	606-626	N
miR319b-5'	AGAGCTCTCTTCAGTCCATTC	TRINITY_DN25141_c0_g4	PREDICTED: uncharacterized protein LOC108997398 [Juglans regia]	GO:0003674(molecular_function);GO:0008150(biological_process);GO:0009507(chloroplast);GO:0016021(integral component of membrane)	-	-	-	4	976-997	N
miR319b-5'	AGAGCTCTCTTCAGTCCATTC	TRINITY_DN25693_c3_g4	PREDICTED: fatty acid desaturase 4, chloroplastic [Juglans regia]	GO:0005737(cytoplasm);GO:0031625(ubiquitin protein ligase binding);GO:0061630(ubiquitin protein ligase activity)	-	-	FAD4	4	370-389	N
miR319b-5'	AGAGCTCTCTTCAGTCCATTC	TRINITY_DN25999_c3_g4	PREDICTED: probable magnesium transporter NIPA6 isoform X1 [Juglans regia]	GO:0005886(plasma membrane);GO:0008150(biological_process);GO:0015095(magnesium ion transmembrane transporter activity);GO:0016021(integral component of membrane)	-	-	At2g21120	4	224-245	N
miR319b-5'	AGAGCTCTCTTCAGTCCATTC	TRINITY_DN26743_c1_g3	PREDICTED: IRK-interacting protein [Juglans regia]	GO:0003674(molecular_function);GO:0005515(protein binding);GO:0005634(nucleus);GO:0008150(biological_process)	-	-	IRKI	3.5	1154-1173	N
miR319b-5'	AGAGCTCTCTTCAGTCCATTC	TRINITY_DN27294_c5_g1	PREDICTED: protein SABRE isoform X1 [Juglans regia]	GO:0005576(extracellular region);GO:0005794(Golgi apparatus);GO:0009860(pollen tube growth);GO:0035619(root hair tip);GO:0048768(root hair cell tip growth);GO:0090404(pollen tube tip)	-	-	SAB	4	3253-3273	N
miR319b-5'	AGAGCTCTCTTCAGTCCATTC	TRINITY_DN27910_c2_g8	-	-	-	-	-	4	22-42	N
miR319b-5'	AGAGCTCTCTTCAGTCCATTC	TRINITY_DN28505_c3_g1	PREDICTED: 7-deoxyloganetin glucosyltransferase-like [Juglans regia]	GO:0009813(flavonoid biosynthetic process);GO:0043231(intracellular membrane-bounded organelle);GO:0052696(flavonoid glucuronidation);GO:0080043(quercetin 3-O-glucosyltransferase activity);GO:0080044(quercetin 7-O-glucosyltransferase activity)	-	-	UGT85A24	4	191-210	N
miR319d-5'	GAGCTTTCTTCAGTCCACTC	TRINITY_DN23371_c1_g9	-	-	-	-	-	4	20-38	N
miR319d-5'	GAGCTTTCTTCAGTCCACTC	TRINITY_DN23514_c2_g1	PREDICTED: tetrahydrocannabinolic acid synthase-like [Juglans regia]	GO:0005737(cytoplasm);GO:0005829(cytosol);GO:0009055(electron carrier activity);GO:0016614(oxidoreductase activity, acting on CH-OH group of donors);GO:0050660(flavin adenine dinucleotide binding);GO:0055114(oxidation-reduction process)	-	-	FAD-OXR	3.5	28-47	N
miR319d-5'	GAGCTTTCTTCAGTCCACTC	TRINITY_DN23744_c1_g5	PREDICTED: B3 domain-containing transcription factor VRN1-like isoform X1 [Juglans regia]	GO:0003677(DNA binding);GO:0005634(nucleus);GO:0005654(nucleoplasm);GO:0006351(transcription, DNA-templated);GO:0006355(regulation of transcription, DNA-templated);GO:0009909(regulation of flower development);GO:0010048(vernalization response)	-	-	VRN1	4	360-380	N
miR319d-5'	GAGCTTTCTTCAGTCCACTC	TRINITY_DN24547_c0_g1	PREDICTED: pentatricopeptide repeat-containing protein At1g06710, mitochondrial [Ziziphus jujuba]	-	-	-	At1g06710	4	357-375	N
miR319d-5'	GAGCTTTCTTCAGTCCACTC	TRINITY_DN25566_c2_g2	-	-	-	-	-	4	36-55	N
miR319d-5'	GAGCTTTCTTCAGTCCACTC	TRINITY_DN25693_c3_g4	PREDICTED: fatty acid desaturase 4, chloroplastic [Juglans regia]	GO:0005737(cytoplasm);GO:0031625(ubiquitin protein ligase binding);GO:0061630(ubiquitin protein ligase activity)	-	-	FAD4	4	370-388	N
miR319d-5'	GAGCTTTCTTCAGTCCACTC	TRINITY_DN26417_c0_g2	-	-	-	-	-	4	60-80	N
miR319d-5'	GAGCTTTCTTCAGTCCACTC	TRINITY_DN26672_c1_g3	PREDICTED: soluble inorganic pyrophosphatase-like isoform X1 [Gossypium raimondii]	GO:0000287(magnesium ion binding);GO:0004427(inorganic diphosphatase activity);GO:0005737(cytoplasm);GO:0005829(cytosol);GO:0006796(phosphate-containing compound metabolic process);GO:0016020(membrane);GO:0046686(response to cadmium ion)	ko00190(Oxidative phosphorylation)	-	PPA4	4	189-207	N
miR319d-5'	GAGCTTTCTTCAGTCCACTC	TRINITY_DN26672_c1_g5	PREDICTED: myosin-binding protein 2-like isoform X1 [Juglans regia]	GO:0005737(cytoplasm);GO:0008150(biological_process);GO:0016021(integral component of membrane);GO:0017022(myosin binding);GO:0030133(transport vesicle)	ko00073(Cutin, suberine and wax biosynthesis)	-	MYOB2	4	189-207	N
miR319d-5'	GAGCTTTCTTCAGTCCACTC	TRINITY_DN26870_c0_g9	PREDICTED: phosphoglycerate kinase, cytosolic-like [Juglans regia]	GO:0004618(phosphoglycerate kinase activity);GO:0005524(ATP binding);GO:0005634(nucleus);GO:0005737(cytoplasm);GO:0005774(vacuolar membrane);GO:0005794(Golgi apparatus);GO:0005829(cytosol);GO:0005886(plasma membrane);GO:0006096(glycolytic process);GO:0009506(plasmodesma);GO:0009570(chloroplast stroma);GO:0016020(membrane);GO:0048046(apoplast)	ko01200(Carbon metabolism);ko01230(Biosynthesis of amino acids);ko00010(Glycolysis / Gluconeogenesis);ko00710(Carbon fixation in photosynthetic organisms)	-	-	4	260-279	N
miR319d-5'	GAGCTTTCTTCAGTCCACTC	TRINITY_DN27379_c1_g1	PREDICTED: proline-, glutamic acid- and leucine-rich protein 1 isoform X1 [Juglans regia]	GO:0005634(nucleus);GO:0008150(biological_process)	-	-	-	4	847-865	N
miR319d-5'	GAGCTTTCTTCAGTCCACTC	TRINITY_DN27565_c0_g1	PREDICTED: interactor of constitutive active ROPs 3-like isoform X1 [Juglans regia]	GO:0051219(phosphoprotein binding)	-	-	ICR2	4	432-450	N
miR319d-5'	GAGCTTTCTTCAGTCCACTC	TRINITY_DN27910_c2_g8	-	-	-	-	-	4	22-41	N
miR319d-5'	GAGCTTTCTTCAGTCCACTC	TRINITY_DN31164_c0_g1	-	-	-	-	-	4	177-197	N
miR394a-3'	AGCTCTGTTGGCTTCTCTTTG	TRINITY_DN25446_c0_g1	PREDICTED: isoaspartyl peptidase/L-asparaginase-like [Juglans regia]	GO:0004067(asparaginase activity);GO:0005737(cytoplasm);GO:0005829(cytosol);GO:0006508(proteolysis);GO:0006516(glycoprotein catabolic process);GO:0008798(beta-aspartyl-peptidase activity);GO:0016787(hydrolase activity);GO:0033345(asparagine catabolic process via L-aspartate);GO:0051604(protein maturation)	ko00511(Other glycan degradation)	-	At5g08100	3	583-602	N
miR394a-3'	AGCTCTGTTGGCTTCTCTTTG	TRINITY_DN26389_c0_g6	PREDICTED: guanylate-binding protein 1-like [Juglans regia]	GO:0003924(GTPase activity);GO:0005525(GTP binding);GO:0005634(nucleus);GO:0005730(nucleolus);GO:0006955(immune response);GO:0009507(chloroplast)	-	-	-	4	996-1016	N
miR394a-3'	AGCTCTGTTGGCTTCTCTTTG	TRINITY_DN26468_c1_g1	PREDICTED: exocyst complex component SEC3A [Theobroma cacao]	GO:0000145(exocyst);GO:0005546(phosphatidylinositol-4,5-bisphosphate binding);GO:0005886(plasma membrane);GO:0006887(exocytosis);GO:0006893(Golgi to plasma membrane transport);GO:0017049(GTP-Rho binding);GO:0051601(exocyst localization)	-	-	SEC3A	3.5	1108-1128	N
miR395b	CTGAAGTGTTTGGGGGAACTC	TRINITY_DN23695_c0_g2	PREDICTED: UPF0481 protein At3g47200-like [Juglans regia]	GO:0003674(molecular_function);GO:0005886(plasma membrane);GO:0008150(biological_process);GO:0016021(integral component of membrane)	-	-	-	4	79-99	N
miR395b	CTGAAGTGTTTGGGGGAACTC	TRINITY_DN24602_c0_g2	PREDICTED: sulfate transporter 2.1 [Juglans regia]	GO:0005887(integral component of plasma membrane);GO:0015116(sulfate transmembrane transporter activity)	-	-	SULTR2;1	2.5	33-53	N
miR395b	CTGAAGTGTTTGGGGGAACTC	TRINITY_DN28445_c0_g1	PREDICTED: CDPK-related kinase 5-like [Juglans regia]	GO:0004683(calmodulin-dependent protein kinase activity);GO:0005516(calmodulin binding);GO:0005634(nucleus);GO:0005737(cytoplasm);GO:0005886(plasma membrane);GO:0009738(abscisic acid-activated signaling pathway);GO:0009931(calcium-dependent protein serine/threonine kinase activity);GO:0018105(peptidyl-serine phosphorylation);GO:0035556(intracellular signal transduction);GO:0046777(protein autopho…	ko04626(Plant-pathogen interaction)	-	CRK5	4	601-620	N
miR395b	CTGAAGTGTTTGGGGGAACTC	TRINITY_DN42176_c0_g1	-	-	-	-	-	4	73-94	N
miR395c-5'	GTTCCCTTGACCACTTCT	TRINITY_DN16626_c0_g1	-	-	-	-	-	3	173-189	N
miR395c-5'	GTTCCCTTGACCACTTCT	TRINITY_DN17780_c0_g2	PREDICTED: ABC transporter B family member 11-like isoform X1 [Juglans regia]	GO:0016021(integral component of membrane);GO:0042626(ATPase activity, coupled to transmembrane movement of substances);GO:0055085(transmembrane transport)	ko02010(ABC transporters)	-	ABCB11	4	197-214	N
miR395c-5'	GTTCCCTTGACCACTTCT	TRINITY_DN23368_c1_g1	PREDICTED: protein CHUP1, chloroplastic-like [Juglans regia]	GO:0009658(chloroplast organization);GO:0009707(chloroplast outer membrane)	ko04144(Endocytosis)	-	CHUP1	3.5	807-824	N
miR395c-5'	GTTCCCTTGACCACTTCT	TRINITY_DN23460_c1_g4	PREDICTED: CDPK-related kinase 3-like isoform X1 [Juglans regia]	GO:0004683(calmodulin-dependent protein kinase activity);GO:0005516(calmodulin binding);GO:0005634(nucleus);GO:0005737(cytoplasm);GO:0005886(plasma membrane);GO:0009738(abscisic acid-activated signaling pathway);GO:0009931(calcium-dependent protein serine/threonine kinase activity);GO:0018105(peptidyl-serine phosphorylation);GO:0035556(intracellular signal transduction);GO:0046777(protein autopho…	ko04626(Plant-pathogen interaction)	-	CRK3	3.5	1249-1265	N
miR395c-5'	GTTCCCTTGACCACTTCT	TRINITY_DN23649_c1_g5	PREDICTED: auxilin-like protein 1 [Juglans regia]	GO:0006457(protein folding);GO:0009507(chloroplast)	-	-	AUL1	4	468-486	N
miR395c-5'	GTTCCCTTGACCACTTCT	TRINITY_DN23819_c4_g1	PREDICTED: WRKY transcription factor 44-like [Juglans regia]	GO:0003700(transcription factor activity, sequence-specific DNA binding);GO:0005515(protein binding);GO:0005634(nucleus);GO:0006351(transcription, DNA-templated);GO:0006355(regulation of transcription, DNA-templated);GO:0006970(response to osmotic stress);GO:0009408(response to heat);GO:0009409(response to cold);GO:0009414(response to water deprivation);GO:0009651(response to salt stress);GO:0010…	ko04626(Plant-pathogen interaction)	-	WRKY46	4	152-170	N
miR395c-5'	GTTCCCTTGACCACTTCT	TRINITY_DN23819_c4_g3	PREDICTED: WRKY transcription factor 44-like [Juglans regia]	GO:0003700(transcription factor activity, sequence-specific DNA binding);GO:0005515(protein binding);GO:0005634(nucleus);GO:0006351(transcription, DNA-templated);GO:0006355(regulation of transcription, DNA-templated);GO:0006970(response to osmotic stress);GO:0009409(response to cold);GO:0009651(response to salt stress);GO:0034605(cellular response to heat);GO:0043565(sequence-specific DNA binding…	ko04626(Plant-pathogen interaction)	-	WRKY25	3.5	234-252	N
miR395c-5'	GTTCCCTTGACCACTTCT	TRINITY_DN24232_c0_g1	hypothetical protein PRUPE_ppa006069mg [Prunus persica]	GO:0004674(protein serine/threonine kinase activity);GO:0005524(ATP binding);GO:0005886(plasma membrane);GO:0006468(protein phosphorylation);GO:0016021(integral component of membrane);GO:0016301(kinase activity)	ko04626(Plant-pathogen interaction)	-	PIX7	4	1532-1548	N
miR395c-5'	GTTCCCTTGACCACTTCT	TRINITY_DN24313_c4_g1	PREDICTED: uncharacterized protein LOC108995230 [Juglans regia]	-	-	-	-	4	402-418	N
miR395c-5'	GTTCCCTTGACCACTTCT	TRINITY_DN25682_c2_g1	PREDICTED: putative amidase C869.01 [Juglans regia]	GO:0004040(amidase activity);GO:0016884(carbon-nitrogen ligase activity, with glutamine as amido-N-donor)	ko00330(Arginine and proline metabolism);ko00360(Phenylalanine metabolism);ko00380(Tryptophan metabolism)	-	SPAC869.01	3.5	375-392	N
miR395c-5'	GTTCCCTTGACCACTTCT	TRINITY_DN25887_c1_g3	PREDICTED: phosphate transporter PHO1 homolog 1 [Juglans regia]	GO:0005802(trans-Golgi network);GO:0005886(plasma membrane)	ko04075(Plant hormone signal transduction)	-	PHO1-H1	4	24-42	N
miR395c-5'	GTTCCCTTGACCACTTCT	TRINITY_DN26035_c1_g1	PREDICTED: serine/threonine-protein kinase TIO [Juglans regia]	GO:0000911(cytokinesis by cell plate formation);GO:0004674(protein serine/threonine kinase activity);GO:0005515(protein binding);GO:0005524(ATP binding);GO:0005737(cytoplasm);GO:0005856(cytoskeleton);GO:0006468(protein phosphorylation);GO:0009524(phragmoplast);GO:0009558(embryo sac cellularization)	ko04140(Regulation of autophagy)	-	TIO	4	70-86	N
miR395c-5'	GTTCCCTTGACCACTTCT	TRINITY_DN26136_c0_g6	PREDICTED: uncharacterized protein LOC108990636 [Juglans regia]	GO:0005768(endosome);GO:0005794(Golgi apparatus);GO:0005802(trans-Golgi network);GO:0008150(biological_process);GO:0009507(chloroplast);GO:0016021(integral component of membrane)	ko04120(Ubiquitin mediated proteolysis)	-	BPG2	4	656-673	N
miR395c-5'	GTTCCCTTGACCACTTCT	TRINITY_DN26802_c2_g1	PREDICTED: lysine-specific demethylase JMJ706-like [Juglans regia]	GO:0000792(heterochromatin);GO:0032454(histone demethylase activity (H3-K9 specific));GO:0045815(positive regulation of gene expression, epigenetic);GO:0048439(flower morphogenesis)	-	-	JMJ706	3.5	1242-1258	N
miR395c-5'	GTTCCCTTGACCACTTCT	TRINITY_DN27057_c0_g5	PREDICTED: nudix hydrolase 14, chloroplastic [Juglans regia]	GO:0009507(chloroplast);GO:0009570(chloroplast stroma);GO:0016787(hydrolase activity);GO:0019144(ADP-sugar diphosphatase activity);GO:0046872(metal ion binding);GO:0080041(ADP-ribose pyrophosphohydrolase activity);GO:0080042(ADP-glucose pyrophosphohydrolase activity)	ko00051(Fructose and mannose metabolism);ko00500(Starch and sucrose metabolism);ko00230(Purine metabolism)	-	NUDT14	4	255-271	N
miR395c-5'	GTTCCCTTGACCACTTCT	TRINITY_DN28174_c0_g1	PREDICTED: uncharacterized protein LOC108982963 [Juglans regia]	GO:0005576(extracellular region);GO:0008375(acetylglucosaminyltransferase activity);GO:0016020(membrane);GO:0016757(transferase activity, transferring glycosyl groups)	ko04144(Endocytosis)	-	At2g35130	4	2234-2251	N
miR395c-5'	GTTCCCTTGACCACTTCT	TRINITY_DN28868_c0_g7	PREDICTED: uncharacterized protein LOC106798504 [Glycine max]	GO:0003723(RNA binding);GO:0004525(ribonuclease III activity);GO:0005634(nucleus);GO:0005737(cytoplasm);GO:0016442(RISC complex);GO:0030422(production of siRNA involved in RNA interference)	ko00591(Linoleic acid metabolism);ko00592(alpha-Linolenic acid metabolism)	-	-	3.5	50-66	N
miR395c-5'	GTTCCCTTGACCACTTCT	TRINITY_DN28868_c0_g8	Retrovirus-related Pol polyprotein from transposon TNT 1-94, partial [Cajanus cajan]	GO:0003723(RNA binding);GO:0004525(ribonuclease III activity);GO:0005634(nucleus);GO:0005737(cytoplasm);GO:0016442(RISC complex);GO:0030422(production of siRNA involved in RNA interference)	ko00564(Glycerophospholipid metabolism);ko00565(Ether lipid metabolism);ko04144(Endocytosis)	-	-	3.5	69-85	N
miR395c-5'	GTTCCCTTGACCACTTCT	TRINITY_DN29215_c0_g1	PREDICTED: protein CHUP1, chloroplastic-like [Juglans regia]	GO:0009658(chloroplast organization);GO:0009707(chloroplast outer membrane)	ko04144(Endocytosis)	-	CHUP1	4	1628-1646	N
miR395c-5'	GTTCCCTTGACCACTTCT	TRINITY_DN29250_c0_g7	PREDICTED: fatty-acid-binding protein 1 [Juglans regia]	GO:0005504(fatty acid binding);GO:0005739(mitochondrion);GO:0006631(fatty acid metabolic process);GO:0009507(chloroplast);GO:0009536(plastid);GO:0009570(chloroplast stroma);GO:0009813(flavonoid biosynthetic process);GO:0009941(chloroplast envelope);GO:0045430(chalcone isomerase activity)	-	-	FAP1	4	92-108	N
miR395c-5'	GTTCCCTTGACCACTTCT	TRINITY_DN29380_c2_g1	PREDICTED: chromatin structure-remodeling complex protein SYD isoform X1 [Juglans regia]	GO:0003677(DNA binding);GO:0003682(chromatin binding);GO:0004386(helicase activity);GO:0005515(protein binding);GO:0005524(ATP binding);GO:0005634(nucleus);GO:0005829(cytosol);GO:0006351(transcription, DNA-templated);GO:0006355(regulation of transcription, DNA-templated);GO:0006952(defense response);GO:0009611(response to wounding);GO:0009873(ethylene-activated signaling pathway);GO:0009908(flowe…	ko03420(Nucleotide excision repair)	-	SYD	3.5	2332-2349	N
miR395c-5'	GTTCCCTTGACCACTTCT	TRINITY_DN29413_c1_g1	PREDICTED: protein TSS [Juglans regia]	GO:0005634(nucleus);GO:0005737(cytoplasm);GO:0005829(cytosol)	ko01200(Carbon metabolism);ko01210(2-Oxocarboxylic acid metabolism);ko01230(Biosynthesis of amino acids);ko00020(Citrate cycle (TCA cycle));ko00630(Glyoxylate and dicarboxylate metabolism)	-	TSS	4	3954-3970	N
miR395c-5'	GTTCCCTTGACCACTTCT	TRINITY_DN40401_c0_g1	-	-	-	-	-	3	28-44	N
miR396a-3'	GTTCAATAAAGCTGTGGGAAG	TRINITY_DN26367_c1_g5	unknown [Glycine max]	-	-	-	-	4	64-84	N
miR396a-3'	GTTCAATAAAGCTGTGGGAAG	TRINITY_DN27059_c0_g2	PREDICTED: uncharacterized protein LOC109004405 isoform X1 [Juglans regia]	GO:0009507(chloroplast);GO:0010027(thylakoid membrane organization);GO:0090391(granum assembly)	-	-	-	4	1648-1668	N
miR396a-3'	GTTCAATAAAGCTGTGGGAAG	TRINITY_DN27314_c3_g1	PREDICTED: luc7-like protein 3 [Juglans regia]	GO:0003729(mRNA binding);GO:0005685(U1 snRNP);GO:0006376(mRNA splice site selection);GO:0071004(U2-type prespliceosome)	-	-	LUC7L3	4	1219-1240	N
miR396a-3'	GTTCAATAAAGCTGTGGGAAG	TRINITY_DN27425_c0_g4	PREDICTED: uncharacterized protein LOC105634230 [Jatropha curcas]	GO:0003674(molecular_function);GO:0005634(nucleus);GO:0008150(biological_process);GO:0016021(integral component of membrane)	-	-	-	3.5	75-94	N
miR396b	TTCCACAGCTTTCTTGAACTTT	TRINITY_DN18627_c0_g1	unnamed protein product [Coffea canephora]	GO:0005198(structural molecule activity);GO:0006886(intracellular protein transport);GO:0016192(vesicle-mediated transport);GO:0030126(COPI vesicle coat)	-	-	COPA	4	120-141	N
miR396b	TTCCACAGCTTTCTTGAACTTT	TRINITY_DN24266_c1_g1	PREDICTED: probable glutathione S-transferase [Vitis vinifera]	GO:0004364(glutathione transferase activity);GO:0005737(cytoplasm);GO:0006749(glutathione metabolic process);GO:0009407(toxin catabolic process)	ko00480(Glutathione metabolism)	-	HSP26-A	4	350-371	N
miR396b	TTCCACAGCTTTCTTGAACTTT	TRINITY_DN26254_c1_g3	PREDICTED: pentatricopeptide repeat-containing protein At4g32450, mitochondrial [Juglans regia]	GO:0005739(mitochondrion);GO:0008150(biological_process);GO:0008270(zinc ion binding)	-	-	PCMP-H63	3	278-298	N
miR396b	TTCCACAGCTTTCTTGAACTTT	TRINITY_DN28003_c1_g1	PREDICTED: uncharacterized protein LOC105127326 isoform X6 [Populus euphratica]	GO:0003674(molecular_function);GO:0008150(biological_process);GO:0009507(chloroplast)	-	-	-	4	2037-2057	N
miR396b	TTCCACAGCTTTCTTGAACTTT	TRINITY_DN28920_c3_g3	P-loop containing nucleoside triphosphate hydrolases superfamily protein isoform 1 [Theobroma cacao]	GO:0000462(maturation of SSU-rRNA from tricistronic rRNA transcript (SSU-rRNA, 5.8S rRNA, LSU-rRNA));GO:0000479(endonucleolytic cleavage of tricistronic rRNA transcript (SSU-rRNA, 5.8S rRNA, LSU-rRNA));GO:0003924(GTPase activity);GO:0005525(GTP binding);GO:0030686(90S preribosome);GO:0034511(U3 snoRNA binding)	ko03008(Ribosome biogenesis in eukaryotes)	-	-	2	248-268	N
miR397b	TCATTGAGTGCAGCGTTGATC	TRINITY_DN23300_c1_g2	PREDICTED: uncharacterized protein LOC108997226 [Juglans regia]	GO:0003674(molecular_function);GO:0005576(extracellular region);GO:0008150(biological_process);GO:0016021(integral component of membrane)	-	-	-	3	472-492	N
miR397b	TCATTGAGTGCAGCGTTGATC	TRINITY_DN24551_c1_g1	PREDICTED: delta(24)-sterol reductase [Juglans regia]	GO:0008202(steroid metabolic process)	ko00100(Steroid biosynthesis)	-	DIM	4	1833-1853	N
miR397c	TCATTGAGTGCAGCGTTGATT	TRINITY_DN25257_c3_g6	hypothetical protein MANES_14G020800 [Manihot esculenta]	-	-	-	-	3.5	131-151	N
miR397c	TCATTGAGTGCAGCGTTGATT	TRINITY_DN39246_c0_g1	-	-	-	-	-	4	202-221	N
miR398a	TGTGTTCTCAGGTCGCCCCTG	TRINITY_DN25738_c0_g1	PREDICTED: dirigent protein 6 [Juglans regia]	GO:0009699(phenylpropanoid biosynthetic process);GO:0042349(guiding stereospecific synthesis activity)	-	-	DIR11	3	396-415	N
miR399c	TGCCAAAGGAGAATTGCCC	TRINITY_DN23295_c1_g2	PREDICTED: peptidyl-prolyl cis-trans isomerase FKBP42-like [Juglans regia]	GO:0003755(peptidyl-prolyl cis-trans isomerase activity);GO:0005528(FK506 binding);GO:0005789(endoplasmic reticulum membrane);GO:0061077(chaperone-mediated protein folding)	ko01200(Carbon metabolism);ko00630(Glyoxylate and dicarboxylate metabolism);ko00260(Glycine, serine and threonine metabolism)	-	FKBP42	3.5	1348-1366	N
miR399c	TGCCAAAGGAGAATTGCCC	TRINITY_DN24227_c0_g2	PREDICTED: protein RETICULATA-RELATED 3, chloroplastic-like [Juglans regia]	GO:0003674(molecular_function);GO:0007275(multicellular organism development);GO:0009507(chloroplast);GO:0009536(plastid);GO:0016021(integral component of membrane);GO:0031969(chloroplast membrane)	ko04144(Endocytosis)	-	RER2	4	968-985	N
miR399c	TGCCAAAGGAGAATTGCCC	TRINITY_DN24479_c0_g3	PREDICTED: urea-proton symporter DUR3 isoform X1 [Juglans regia]	GO:0005887(integral component of plasma membrane);GO:0015204(urea transmembrane transporter activity);GO:0015293(symporter activity)	-	-	DUR3	4	354-371	N
miR399c	TGCCAAAGGAGAATTGCCC	TRINITY_DN25873_c0_g3	PREDICTED: rRNA-processing protein UTP23 homolog [Jatropha curcas]	GO:0000462(maturation of SSU-rRNA from tricistronic rRNA transcript (SSU-rRNA, 5.8S rRNA, LSU-rRNA));GO:0005730(nucleolus);GO:0032040(small-subunit processome);GO:0070181(small ribosomal subunit rRNA binding)	-	-	-	3.5	439-457	N
miR399c	TGCCAAAGGAGAATTGCCC	TRINITY_DN25912_c0_g4	PREDICTED: cationic amino acid transporter 9, chloroplastic [Juglans regia]	GO:0005887(integral component of plasma membrane);GO:0015179(L-amino acid transmembrane transporter activity);GO:0015297(antiporter activity)	-	-	CAT9	4	998-1017	N
miR399c	TGCCAAAGGAGAATTGCCC	TRINITY_DN26118_c1_g2	-	-	-	-	-	4	794-812	N
miR399c	TGCCAAAGGAGAATTGCCC	TRINITY_DN27290_c1_g1	PREDICTED: protein translocase subunit SECA2, chloroplastic isoform X1 [Juglans regia]	GO:0009507(chloroplast)	ko03060(Protein export)	-	SECA2	3.5	1638-1656	N
miR399c	TGCCAAAGGAGAATTGCCC	TRINITY_DN28164_c0_g1	PREDICTED: pentatricopeptide repeat-containing protein At1g79490, mitochondrial isoform X1 [Juglans regia]	GO:0005739(mitochondrion);GO:0009793(embryo development ending in seed dormancy)	-	-	EMB2217	3.5	816-834	N
miR399c	TGCCAAAGGAGAATTGCCC	TRINITY_DN28658_c0_g3	PREDICTED: phospholipase D delta-like [Juglans regia]	GO:0004630(phospholipase D activity);GO:0005509(calcium ion binding);GO:0005773(vacuole);GO:0005886(plasma membrane);GO:0009409(response to cold);GO:0009506(plasmodesma);GO:0009789(positive regulation of abscisic acid-activated signaling pathway);GO:0012501(programmed cell death);GO:0016020(membrane);GO:0016042(lipid catabolic process);GO:0046470(phosphatidylcholine metabolic process);GO:0046473(…	ko00564(Glycerophospholipid metabolism);ko00565(Ether lipid metabolism);ko04144(Endocytosis)	-	PLDDELTA	4	1723-1741	N
miR399c	TGCCAAAGGAGAATTGCCC	TRINITY_DN29124_c0_g6	PREDICTED: protein DOWNSTREAM OF FLC-like [Juglans regia]	GO:0003674(molecular_function);GO:0005576(extracellular region);GO:0008150(biological_process)	ko00970(Aminoacyl-tRNA biosynthesis)	-	At2g16220	4	99-116	N
miR399c	TGCCAAAGGAGAATTGCCC	TRINITY_DN40039_c0_g1	-	-	-	-	-	4	42-60	N
miR399c	TGCCAAAGGAGAATTGCCC	TRINITY_DN44572_c0_g1	-	-	-	-	-	4	232-250	N
miR403b	TTAGATTCACGCACAAACTT	TRINITY_DN24724_c3_g5	PREDICTED: translin-associated protein X isoform X3 [Ricinus communis]	GO:0005634(nucleus)	-	-	TSNAX	3.5	605-625	N
miR403b	TTAGATTCACGCACAAACTT	TRINITY_DN26204_c2_g1	-	-	-	-	-	1	109-128	N
miR403c-5'	AGTTTGTGCGTGAATCTAACA	TRINITY_DN23228_c1_g3	-	-	-	-	-	4	406-427	N
miR403c-5'	AGTTTGTGCGTGAATCTAACA	TRINITY_DN26027_c0_g3	PREDICTED: AP2-like ethylene-responsive transcription factor BBM [Juglans regia]	-	-	-	-	4	67-86	N
miR403c-5'	AGTTTGTGCGTGAATCTAACA	TRINITY_DN26204_c2_g1	-	-	-	-	-	0	182-202	N
miR4415	TTGATTCTCATCACAACTTGG	TRINITY_DN15795_c0_g1	PREDICTED: pentatricopeptide repeat-containing protein At4g39530 [Juglans regia]	GO:0005739(mitochondrion);GO:0008150(biological_process)	ko00500(Starch and sucrose metabolism)	-	PCMP-E52	4	44-64	N
miR4415	TTGATTCTCATCACAACTTGG	TRINITY_DN24314_c0_g9	-	-	-	-	-	3.5	139-158	N
miR4415	TTGATTCTCATCACAACTTGG	TRINITY_DN25604_c4_g2	PREDICTED: fasciclin-like arabinogalactan protein 12 [Juglans regia]	GO:0005886(plasma membrane);GO:0009834(plant-type secondary cell wall biogenesis);GO:0031225(anchored component of membrane)	ko03015(mRNA surveillance pathway)	-	FLA12	4	1055-1075	N
miR4415	TTGATTCTCATCACAACTTGG	TRINITY_DN27215_c0_g1	-	-	-	-	-	2.5	38-59	N
miR4415	TTGATTCTCATCACAACTTGG	TRINITY_DN29364_c0_g1	PREDICTED: DNA-directed RNA polymerase II subunit 1, partial [Juglans regia]	GO:0001055(RNA polymerase II activity);GO:0005665(DNA-directed RNA polymerase II, core complex)	ko00230(Purine metabolism);ko00240(Pyrimidine metabolism);ko03020(RNA polymerase)	-	NRPB1	4	2483-2502	N
miR477-5'	ACTCTCCCTCAAGGGCTTCTC	TRINITY_DN23711_c0_g2	Phosphatidylinositol 4-kinase beta 1 [Morus notabilis]	GO:0004430(1-phosphatidylinositol 4-kinase activity);GO:0005737(cytoplasm)	ko00562(Inositol phosphate metabolism);ko04070(Phosphatidylinositol signaling system)	-	PI4KB1	4	1262-1282	N
miR477-5'	ACTCTCCCTCAAGGGCTTCTC	TRINITY_DN24705_c2_g1	PREDICTED: nicotinamidase 2-like [Juglans regia]	GO:0003824(catalytic activity);GO:0005575(cellular_component);GO:0008936(nicotinamidase activity);GO:0019363(pyridine nucleotide biosynthetic process);GO:0019674(NAD metabolic process)	-	-	NIC2	3.5	423-443	N
miR482b-5'	ATGGGCGAGTGGGGAAGA	TRINITY_DN19686_c0_g1	PREDICTED: pentatricopeptide repeat-containing protein At4g19220, mitochondrial [Juglans regia]	GO:0008150(biological_process);GO:0008270(zinc ion binding);GO:0009507(chloroplast)	ko00500(Starch and sucrose metabolism)	-	PCMP-E2	4	28-45	N
miR482b-5'	ATGGGCGAGTGGGGAAGA	TRINITY_DN21496_c0_g1	-	-	-	-	-	3.5	365-382	N
miR482b-5'	ATGGGCGAGTGGGGAAGA	TRINITY_DN22938_c0_g10	-	-	-	-	-	3	136-154	N
miR482b-5'	ATGGGCGAGTGGGGAAGA	TRINITY_DN23149_c1_g1	-	-	-	-	-	3.5	105-123	N
miR482b-5'	ATGGGCGAGTGGGGAAGA	TRINITY_DN23282_c0_g1	-	-	-	-	-	4	226-243	N
miR482b-5'	ATGGGCGAGTGGGGAAGA	TRINITY_DN23306_c1_g1	-	-	-	-	-	4	121-137	N
miR482b-5'	ATGGGCGAGTGGGGAAGA	TRINITY_DN23373_c3_g3	PREDICTED: endoplasmic reticulum metallopeptidase 1-like isoform X1 [Juglans regia]	GO:0001541(ovarian follicle development);GO:0003674(molecular_function);GO:0005783(endoplasmic reticulum);GO:0005789(endoplasmic reticulum membrane);GO:0006508(proteolysis);GO:0008237(metallopeptidase activity);GO:0016020(membrane);GO:0016021(integral component of membrane);GO:0046872(metal ion binding)	ko03018(RNA degradation)	-	Ermp1	4	3308-3325	N
miR482b-5'	ATGGGCGAGTGGGGAAGA	TRINITY_DN23423_c1_g4	predicted protein [Hordeum vulgare subsp. vulgare]	GO:0005351(sugar:proton symporter activity);GO:0005355(glucose transmembrane transporter activity);GO:0005887(integral component of plasma membrane);GO:0035428(hexose transmembrane transport);GO:0046323(glucose import)	-	-	RGT2	4	1324-1340	N
miR482b-5'	ATGGGCGAGTGGGGAAGA	TRINITY_DN23653_c0_g11	PREDICTED: putative receptor protein kinase ZmPK1 [Juglans regia]	GO:0004674(protein serine/threonine kinase activity);GO:0005886(plasma membrane);GO:0006468(protein phosphorylation)	-	-	-	4	52-69	N
miR482b-5'	ATGGGCGAGTGGGGAAGA	TRINITY_DN23818_c0_g3	PREDICTED: uncharacterized protein LOC109006814 [Juglans regia]	GO:0005509(calcium ion binding);GO:0009507(chloroplast);GO:0009654(photosystem II oxygen evolving complex);GO:0015979(photosynthesis);GO:0019898(extrinsic component of membrane)	-	-	-	4	183-200	N
miR482b-5'	ATGGGCGAGTGGGGAAGA	TRINITY_DN23970_c2_g4	-	-	-	-	-	3	89-105	N
miR482b-5'	ATGGGCGAGTGGGGAAGA	TRINITY_DN24074_c0_g1	-	-	-	-	-	4	31-47	N
miR482b-5'	ATGGGCGAGTGGGGAAGA	TRINITY_DN24502_c4_g1	PREDICTED: protein slowmo homolog [Juglans regia]	GO:0005758(mitochondrial intermembrane space);GO:1990050(phosphatidic acid transporter activity)	-	-	-	4	1008-1024	N
miR482b-5'	ATGGGCGAGTGGGGAAGA	TRINITY_DN24823_c0_g5	-	-	-	-	-	4	166-183	N
miR482b-5'	ATGGGCGAGTGGGGAAGA	TRINITY_DN25594_c0_g7	PREDICTED: probable tyrosine-protein phosphatase At1g05000 [Juglans regia]	GO:0004721(phosphoprotein phosphatase activity);GO:0004725(protein tyrosine phosphatase activity);GO:0005737(cytoplasm);GO:0016311(dephosphorylation);GO:0016791(phosphatase activity)	-	-	At1g05000	3.5	3-20	N
miR482b-5'	ATGGGCGAGTGGGGAAGA	TRINITY_DN26789_c2_g4	-	-	-	-	-	4	257-275	N
miR482b-5'	ATGGGCGAGTGGGGAAGA	TRINITY_DN26846_c1_g4	PREDICTED: uncharacterized protein LOC108996189 [Juglans regia]	GO:0003674(molecular_function);GO:0005575(cellular_component);GO:0008150(biological_process)	-	-	-	3	460-477	N
miR482b-5'	ATGGGCGAGTGGGGAAGA	TRINITY_DN27063_c1_g4	PREDICTED: E3 ubiquitin-protein ligase RING1-like [Juglans regia]	GO:0000209(protein polyubiquitination);GO:0042787(protein ubiquitination involved in ubiquitin-dependent protein catabolic process);GO:0043161(proteasome-mediated ubiquitin-dependent protein catabolic process);GO:0061630(ubiquitin protein ligase activity)	ko03013(RNA transport)	-	At3g19950	4	265-281	N
miR482b-5'	ATGGGCGAGTGGGGAAGA	TRINITY_DN27360_c0_g12	-	-	-	-	-	4	230-248	N
miR482b-5'	ATGGGCGAGTGGGGAAGA	TRINITY_DN27620_c2_g2	PREDICTED: rust resistance kinase Lr10-like isoform X1 [Juglans regia]	GO:0005886(plasma membrane)	ko00520(Amino sugar and nucleotide sugar metabolism)	-	LRK10	3	1199-1215	N
miR482b-5'	ATGGGCGAGTGGGGAAGA	TRINITY_DN28086_c0_g4	PREDICTED: uncharacterized protein LOC109013963 [Juglans regia]	GO:0003676(nucleic acid binding);GO:0005737(cytoplasm);GO:0008150(biological_process)	ko03010(Ribosome)	-	R3hdm2	3.5	1726-1743	N
miR482b-5'	ATGGGCGAGTGGGGAAGA	TRINITY_DN28191_c3_g2	-	-	-	-	-	4	113-130	N
miR482b-5'	ATGGGCGAGTGGGGAAGA	TRINITY_DN28487_c0_g1	PREDICTED: nucleolar complex protein 4 homolog [Juglans regia]	GO:0000462(maturation of SSU-rRNA from tricistronic rRNA transcript (SSU-rRNA, 5.8S rRNA, LSU-rRNA));GO:0005730(nucleolus);GO:0030692(Noc4p-Nop14p complex);GO:0032040(small-subunit processome)	-	-	Noc4l	3	159-177	N
miR482b-5'	ATGGGCGAGTGGGGAAGA	TRINITY_DN28922_c1_g1	PREDICTED: abscisic acid receptor PYR1-like [Ziziphus jujuba]	GO:0004864(protein phosphatase inhibitor activity);GO:0004872(receptor activity);GO:0005634(nucleus);GO:0005737(cytoplasm);GO:0009738(abscisic acid-activated signaling pathway);GO:0010427(abscisic acid binding);GO:0080163(regulation of protein serine/threonine phosphatase activity)	ko04075(Plant hormone signal transduction)	-	PYL1	4	170-187	N
miR482b-5'	ATGGGCGAGTGGGGAAGA	TRINITY_DN29125_c3_g4	PREDICTED: E3 ubiquitin-protein ligase BRE1-like 1 isoform X1 [Juglans regia]	-	-	-	-	3.5	3-21	N
miR482b-5'	ATGGGCGAGTGGGGAAGA	TRINITY_DN29672_c0_g1	-	-	-	-	-	4	17-34	N
miR482b-5'	ATGGGCGAGTGGGGAAGA	TRINITY_DN35267_c0_g1	PREDICTED: cytochrome P450 71A22-like [Prunus mume]	GO:0016020(membrane);GO:0016709(oxidoreductase activity, acting on paired donors, with incorporation or reduction of molecular oxygen, NAD(P)H as one donor, and incorporation of one atom of oxygen);GO:0044550(secondary metabolite biosynthetic process)	ko00903(Limonene and pinene degradation);ko00945(Stilbenoid, diarylheptanoid and gingerol biosynthesis)	-	CYP71A8	4	97-114	N
miR482b-5'	ATGGGCGAGTGGGGAAGA	TRINITY_DN36617_c0_g1	-	-	-	-	-	4	142-159	N
miR482b-5'	ATGGGCGAGTGGGGAAGA	TRINITY_DN40448_c0_g1	-	-	-	-	-	4	48-64	N
miR482b-5'	ATGGGCGAGTGGGGAAGA	TRINITY_DN42711_c0_g1	hypothetical protein MIMGU_mgv1a0188422mg, partial [Erythranthe guttata]	GO:0000166(nucleotide binding);GO:0005524(ATP binding);GO:0005737(cytoplasm);GO:0005832(chaperonin-containing T-complex);GO:0006457(protein folding);GO:0044351(macropinocytosis);GO:0051082(unfolded protein binding)	-	-	cct4	4	27-44	N
miR482c	TCTTTCCTAGCCCTCCCATTCC	TRINITY_DN23171_c1_g4	-	-	-	-	-	4	183-205	N
miR482c	TCTTTCCTAGCCCTCCCATTCC	TRINITY_DN23171_c1_g5	PREDICTED: protein NRT1/ PTR FAMILY 5.2-like [Juglans regia]	GO:0005215(transporter activity);GO:0005886(plasma membrane);GO:0006857(oligopeptide transport);GO:0009611(response to wounding);GO:0009737(response to abscisic acid);GO:0009751(response to salicylic acid);GO:0009753(response to jasmonic acid);GO:0016020(membrane);GO:0016021(integral component of membrane);GO:0042538(hyperosmotic salinity response);GO:0042742(defense response to bacterium);GO:004…	-	-	NPF5.2	3	221-242	N
miR482c	TCTTTCCTAGCCCTCCCATTCC	TRINITY_DN23513_c0_g1	hypothetical protein POPTR_0019s10290g, partial [Populus trichocarpa]	GO:0005524(ATP binding);GO:0005634(nucleus);GO:0006952(defense response);GO:0043531(ADP binding)	ko01230(Biosynthesis of amino acids);ko00400(Phenylalanine, tyrosine and tryptophan biosynthesis)	-	RGA3	2	109-130	N
miR530a	TCTGCATTTGCACCTGCACCT	TRINITY_DN23589_c3_g7	PREDICTED: heat shock 70 kDa protein 16-like isoform X1 [Juglans regia]	GO:0005524(ATP binding);GO:0005634(nucleus);GO:0005737(cytoplasm);GO:0005829(cytosol);GO:0005886(plasma membrane);GO:0006457(protein folding);GO:0009408(response to heat);GO:0046686(response to cadmium ion)	ko03040(Spliceosome);ko04141(Protein processing in endoplasmic reticulum);ko04144(Endocytosis)	-	HSP70-16	3	237-258	N
miR530a	TCTGCATTTGCACCTGCACCT	TRINITY_DN24066_c0_g3	PREDICTED: uncharacterized protein At4g15970-like [Juglans regia]	GO:0008150(biological_process);GO:0009507(chloroplast);GO:0009543(chloroplast thylakoid lumen);GO:0016740(transferase activity)	-	-	At4g15970	3.5	1831-1851	N
miR530a	TCTGCATTTGCACCTGCACCT	TRINITY_DN25477_c1_g6	-	-	-	-	-	4	411-431	N
miR530a	TCTGCATTTGCACCTGCACCT	TRINITY_DN26390_c0_g3	PREDICTED: uncharacterized protein LOC109011901 isoform X1 [Juglans regia]	GO:0003674(molecular_function);GO:0005634(nucleus);GO:0008150(biological_process)	-	-	-	4	798-819	N
miR530a	TCTGCATTTGCACCTGCACCT	TRINITY_DN29109_c0_g1	PREDICTED: uncharacterized protein LOC108983521 isoform X1 [Juglans regia]	GO:0003676(nucleic acid binding);GO:0003677(DNA binding);GO:0005634(nucleus);GO:0006352(DNA-templated transcription, initiation);GO:0006355(regulation of transcription, DNA-templated);GO:0006368(transcription elongation from RNA polymerase II promoter);GO:0008270(zinc ion binding);GO:0016570(histone modification);GO:0016593(Cdc73/Paf1 complex);GO:0040007(growth)	ko03010(Ribosome)	-	-	0.5	302-322	N
miR530a	TCTGCATTTGCACCTGCACCT	TRINITY_DN29221_c1_g4	PREDICTED: calmodulin-binding protein 60 B-like [Juglans regia]	GO:0005516(calmodulin binding);GO:0005634(nucleus);GO:0006950(response to stress)	-	-	CBP60B	3.5	50-70	N
miR530a	TCTGCATTTGCACCTGCACCT	TRINITY_DN44728_c0_g1	-	-	-	-	-	2	40-60	N
miR530c	AGGTGCAGGTGCAGGTGCAGG	TRINITY_DN22642_c0_g1	-	-	-	-	-	0	21-41	N
miR530c	AGGTGCAGGTGCAGGTGCAGG	TRINITY_DN24716_c0_g4	PREDICTED: serrate RNA effector molecule-like isoform X1 [Juglans regia]	GO:0003677(DNA binding);GO:0003700(transcription factor activity, sequence-specific DNA binding);GO:0005515(protein binding);GO:0005634(nucleus);GO:0005730(nucleolus);GO:0005829(cytosol);GO:0006355(regulation of transcription, DNA-templated);GO:0006397(mRNA processing);GO:0008380(RNA splicing);GO:0009507(chloroplast);GO:0010267(production of ta-siRNAs involved in RNA interference);GO:0010445(nucl…	-	-	SE	3	63-83	N
miR530c	AGGTGCAGGTGCAGGTGCAGG	TRINITY_DN25011_c3_g3	PREDICTED: RING-H2 finger protein ATL52 [Theobroma cacao]	GO:0043161(proteasome-mediated ubiquitin-dependent protein catabolic process);GO:0061630(ubiquitin protein ligase activity)	-	-	Os04g0590900	4	149-169	N
miR530c	AGGTGCAGGTGCAGGTGCAGG	TRINITY_DN26955_c2_g1	-	-	-	-	-	4	619-639	N
miR530c	AGGTGCAGGTGCAGGTGCAGG	TRINITY_DN27063_c1_g7	-	-	-	-	-	3	150-170	N
miR530c	AGGTGCAGGTGCAGGTGCAGG	TRINITY_DN27266_c1_g6	hypothetical protein TanjilG_02313 [Lupinus angustifolius]	GO:0004867(serine-type endopeptidase inhibitor activity);GO:0005576(extracellular region);GO:0006979(response to oxidative stress);GO:0016021(integral component of membrane)	-	-	-	4	306-325	N
miR530c	AGGTGCAGGTGCAGGTGCAGG	TRINITY_DN31262_c0_g1	-	-	-	-	-	4	31-50	N
miR530c	AGGTGCAGGTGCAGGTGCAGG	TRINITY_DN34154_c0_g1	Single-stranded TG1-3 DNA-binding protein [Anthurium amnicola]	-	-	-	-	2	46-66	N
miR530c	AGGTGCAGGTGCAGGTGCAGG	TRINITY_DN35547_c0_g1	-	-	-	-	-	4	21-42	N
miR530c	AGGTGCAGGTGCAGGTGCAGG	TRINITY_DN35952_c0_g1	-	-	-	-	-	4	102-122	N
miR530c	AGGTGCAGGTGCAGGTGCAGG	TRINITY_DN549_c0_g1	-	GO:0005776(autophagosome);GO:0006511(ubiquitin-dependent protein catabolic process);GO:0016235(aggresome);GO:0016239(positive regulation of macroautophagy);GO:0042802(identical protein binding);GO:0043130(ubiquitin binding)	-	-	Sqstm1	4	251-271	N
miR7122a-3'	ACCGTGTTTCTCTGTATAAGG	TRINITY_DN25502_c1_g2	-	-	-	-	-	3.5	217-238	N
miR7122b	TTATTCAGAGAAATCACGGT	TRINITY_DN24984_c0_g1	-	-	-	-	-	4	255-274	N
miR7122b	TTATTCAGAGAAATCACGGT	TRINITY_DN25244_c1_g1	-	-	-	-	-	3	112-130	N
miR7122b	TTATTCAGAGAAATCACGGT	TRINITY_DN26589_c1_g2	-	-	-	-	-	4	453-472	N
miR7122b	TTATTCAGAGAAATCACGGT	TRINITY_DN26877_c0_g2	PREDICTED: uncharacterized protein LOC109004054 [Juglans regia]	GO:0003674(molecular_function);GO:0005774(vacuolar membrane);GO:0005783(endoplasmic reticulum);GO:0005794(Golgi apparatus);GO:0008150(biological_process);GO:0016020(membrane);GO:0016021(integral component of membrane)	-	-	-	4	493-512	N
miR7122b	TTATTCAGAGAAATCACGGT	TRINITY_DN27804_c1_g5	PREDICTED: chitinase domain-containing protein 1 [Juglans regia]	GO:0004568(chitinase activity);GO:0005576(extracellular region);GO:0006032(chitin catabolic process);GO:0008061(chitin binding)	-	-	chid1	3.5	1571-1589	N
miR7122b	TTATTCAGAGAAATCACGGT	TRINITY_DN28530_c3_g4	PREDICTED: uncharacterized protein LOC109012704 isoform X1 [Juglans regia]	GO:0031305(integral component of mitochondrial inner membrane);GO:0033617(mitochondrial respiratory chain complex IV assembly);GO:0097249(mitochondrial respiratory chain supercomplex)	-	-	-	4	586-605	N
miR7122b	TTATTCAGAGAAATCACGGT	TRINITY_DN28817_c0_g1	-	GO:0002503(peptide antigen assembly with MHC class II protein complex);GO:0002506(polysaccharide assembly with MHC class II protein complex);GO:0005765(lysosomal membrane);GO:0006955(immune response);GO:0009986(cell surface);GO:0016021(integral component of membrane);GO:0023026(MHC class II protein complex binding);GO:0031902(late endosome membrane);GO:0042605(peptide antigen binding);GO:0042613(…	-	-	HLA-DRA	4	1188-1207	N
miR7122b	TTATTCAGAGAAATCACGGT	TRINITY_DN28902_c0_g4	-	-	-	-	-	4	217-237	N
miR7122b	TTATTCAGAGAAATCACGGT	TRINITY_DN41192_c0_g1	unknown [Picea sitchensis]	GO:0000166(nucleotide binding);GO:0005515(protein binding);GO:0005524(ATP binding);GO:0006810(transport);GO:0008152(metabolic process);GO:0009409(response to cold);GO:0016887(ATPase activity)	-	-	ybiT	4	200-218	N
miR7122b	TTATTCAGAGAAATCACGGT	TRINITY_DN42323_c0_g1	-	-	-	-	-	3.5	156-174	N
miR7122b	TTATTCAGAGAAATCACGGT	TRINITY_DN46363_c0_g1	hypothetical protein SELMODRAFT_131043 [Selaginella moellendorffii]	GO:0003341(cilium movement);GO:0003774(motor activity);GO:0005524(ATP binding);GO:0005858(axonemal dynein complex);GO:0005875(microtubule associated complex);GO:0007018(microtubule-based movement);GO:0008569(ATP-dependent microtubule motor activity, minus-end-directed);GO:0036156(inner dynein arm);GO:0042623(ATPase activity, coupled)	-	-	DHC1	3	159-177	N
miR7122b	TTATTCAGAGAAATCACGGT	TRINITY_DN9041_c0_g1	-	-	-	-	-	4	98-118	N
miR7122b-3'	ACCGTGTTTCTCTGTATAAAG	TRINITY_DN25244_c1_g1	-	-	-	-	-	4	51-72	N
miR7122b-3'	ACCGTGTTTCTCTGTATAAAG	TRINITY_DN26351_c1_g2	PREDICTED: eukaryotic translation initiation factor 2 subunit alpha-like [Jatropha curcas]	GO:0003743(translation initiation factor activity);GO:0005840(ribosome);GO:0005850(eukaryotic translation initiation factor 2 complex);GO:0005851(eukaryotic translation initiation factor 2B complex);GO:0006413(translational initiation);GO:0033290(eukaryotic 48S preinitiation complex);GO:0043022(ribosome binding);GO:0043614(multi-eIF complex)	ko03013(RNA transport);ko04141(Protein processing in endoplasmic reticulum)	-	At2g40290	4	499-518	N
miR7122b-3'	ACCGTGTTTCTCTGTATAAAG	TRINITY_DN26606_c3_g1	PREDICTED: cysteine protease XCP2 [Theobroma cacao]	GO:0004197(cysteine-type endopeptidase activity);GO:0005615(extracellular space);GO:0005764(lysosome);GO:0051603(proteolysis involved in cellular protein catabolic process)	ko04145(Phagosome)	-	XCP2	4	1204-1224	N
miR7122c	TTATACAATGAAATCACGGCC	TRINITY_DN23089_c3_g1	-	-	-	-	-	2.5	153-173	N
miR7122c	TTATACAATGAAATCACGGCC	TRINITY_DN24955_c1_g2	PREDICTED: desumoylating isopeptidase 1-like isoform X1 [Juglans regia]	GO:0003674(molecular_function);GO:0005634(nucleus);GO:0005737(cytoplasm);GO:0008150(biological_process)	-	-	desi1	3.5	1540-1559	N
miR7122c	TTATACAATGAAATCACGGCC	TRINITY_DN26722_c2_g3	PREDICTED: uncharacterized protein LOC108981493 [Juglans regia]	GO:0005525(GTP binding);GO:0005634(nucleus);GO:0007264(small GTPase mediated signal transduction)	-	-	HUA1	4	1888-1909	N
miR7122c	TTATACAATGAAATCACGGCC	TRINITY_DN27946_c0_g1	-	-	-	-	-	4	152-173	N
miR8122	TGAAGGAAGATTTGTGGAAAG	TRINITY_DN12739_c0_g1	PREDICTED: uncharacterized protein LOC108979681 [Juglans regia]	GO:0003674(molecular_function);GO:0005634(nucleus);GO:0008150(biological_process)	-	-	-	3.5	125-145	N
miR8122	TGAAGGAAGATTTGTGGAAAG	TRINITY_DN15548_c0_g1	PREDICTED: uncharacterized protein LOC108995991 [Juglans regia]	-	-	-	-	4	51-72	N
miR8122	TGAAGGAAGATTTGTGGAAAG	TRINITY_DN22866_c0_g1	-	GO:0001540(beta-amyloid binding);GO:0005524(ATP binding);GO:0005615(extracellular space);GO:0005886(plasma membrane);GO:0030660(Golgi-associated vesicle membrane);GO:0031301(integral component of organelle membrane);GO:0042985(negative regulation of amyloid precursor protein biosynthetic process);GO:0070062(extracellular exosome)	-	-	ITM2B	4	927-947	N
miR8122	TGAAGGAAGATTTGTGGAAAG	TRINITY_DN24251_c2_g6	PREDICTED: receptor like protein 30-like [Juglans regia]	-	-	-	-	4	358-377	N
miR8122	TGAAGGAAGATTTGTGGAAAG	TRINITY_DN24406_c0_g4	-	-	-	-	-	4	222-241	N
miR8122	TGAAGGAAGATTTGTGGAAAG	TRINITY_DN24747_c1_g8	PREDICTED: SAL1 phosphatase-like isoform X2 [Juglans regia]	GO:0000287(magnesium ion binding);GO:0005737(cytoplasm);GO:0008441(3'(2'),5'-bisphosphate nucleotidase activity)	ko00562(Inositol phosphate metabolism);ko00920(Sulfur metabolism);ko04070(Phosphatidylinositol signaling system)	-	SAL1	3.5	671-690	N
miR8122	TGAAGGAAGATTTGTGGAAAG	TRINITY_DN25177_c0_g1	PREDICTED: zinc finger CCCH domain-containing protein 19-like [Juglans regia]	GO:0005634(nucleus);GO:0005829(cytosol)	ko00565(Ether lipid metabolism)	-	NERD	3.5	1875-1895	N
miR8122	TGAAGGAAGATTTGTGGAAAG	TRINITY_DN25416_c0_g4	-	-	-	-	-	3.5	37-57	N
miR8122	TGAAGGAAGATTTGTGGAAAG	TRINITY_DN25462_c0_g3	-	-	-	-	-	4	170-189	N
miR8122	TGAAGGAAGATTTGTGGAAAG	TRINITY_DN26089_c2_g1	PREDICTED: probable leucine-rich repeat receptor-like serine/threonine-protein kinase At3g14840 [Nelumbo nucifera]	GO:0004674(protein serine/threonine kinase activity);GO:0005886(plasma membrane)	-	-	LRR-RLK	3.5	395-415	N
miR8122	TGAAGGAAGATTTGTGGAAAG	TRINITY_DN26970_c2_g3	-	-	-	-	-	4	1475-1495	N
miR8122	TGAAGGAAGATTTGTGGAAAG	TRINITY_DN27135_c0_g2	PREDICTED: uncharacterized protein LOC104595996 [Nelumbo nucifera]	-	-	-	-	3.5	627-647	N
miR8122	TGAAGGAAGATTTGTGGAAAG	TRINITY_DN28030_c0_g1	PREDICTED: xyloglucan galactosyltransferase MUR3 [Juglans regia]	GO:0003824(catalytic activity);GO:0005768(endosome);GO:0005794(Golgi apparatus);GO:0005802(trans-Golgi network);GO:0009826(unidimensional cell growth);GO:0009863(salicylic acid mediated signaling pathway);GO:0009969(xyloglucan biosynthetic process);GO:0010256(endomembrane system organization);GO:0016020(membrane);GO:0016757(transferase activity, transferring glycosyl groups);GO:0030173(integral c…	-	-	MUR3	3.5	107-127	N
miR8122	TGAAGGAAGATTTGTGGAAAG	TRINITY_DN28633_c1_g1	-	-	-	-	-	3.5	106-126	N
miR8122	TGAAGGAAGATTTGTGGAAAG	TRINITY_DN29092_c2_g3	PREDICTED: U3 small nucleolar RNA-associated protein 6 homolog [Juglans regia]	GO:0000462(maturation of SSU-rRNA from tricistronic rRNA transcript (SSU-rRNA, 5.8S rRNA, LSU-rRNA));GO:0030515(snoRNA binding);GO:0032040(small-subunit processome);GO:0034388(Pwp2p-containing subcomplex of 90S preribosome)	ko03008(Ribosome biogenesis in eukaryotes)	-	-	4	796-815	N
miR8122	TGAAGGAAGATTTGTGGAAAG	TRINITY_DN29420_c2_g1	PREDICTED: eukaryotic translation initiation factor 4G-like isoform X1 [Juglans regia]	GO:0003743(translation initiation factor activity);GO:0005576(extracellular region);GO:0005737(cytoplasm);GO:0006413(translational initiation);GO:0006417(regulation of translation);GO:0009615(response to virus);GO:0009737(response to abscisic acid)	ko03013(RNA transport)	-	EIF4G	4	4508-4528	N
miR8122	TGAAGGAAGATTTGTGGAAAG	TRINITY_DN37765_c0_g1	-	-	-	-	-	4	47-67	N
miR8122	TGAAGGAAGATTTGTGGAAAG	TRINITY_DN39719_c0_g1	-	GO:0004842(ubiquitin-protein transferase activity);GO:0005634(nucleus);GO:0042787(protein ubiquitination involved in ubiquitin-dependent protein catabolic process);GO:0046872(metal ion binding)	-	-	-	2	168-187	N
miR8122	TGAAGGAAGATTTGTGGAAAG	TRINITY_DN43638_c0_g1	-	-	-	-	-	4	274-293	N
miR8122	TGAAGGAAGATTTGTGGAAAG	TRINITY_DN7786_c0_g1	-	-	-	-	-	3.5	24-44	N
miR858	TTCGTTGTCTGTTCGACCTTG	TRINITY_DN24062_c1_g2	PREDICTED: uncharacterized protein LOC107422177, partial [Ziziphus jujuba]	GO:0003674(molecular_function);GO:0005739(mitochondrion);GO:0008150(biological_process);GO:0016021(integral component of membrane)	ko04144(Endocytosis)	-	-	4	98-119	N
miR858	TTCGTTGTCTGTTCGACCTTG	TRINITY_DN25122_c2_g6	PREDICTED: transcription factor MYB12-like [Juglans regia]	GO:0003677(DNA binding);GO:0003700(transcription factor activity, sequence-specific DNA binding);GO:0005634(nucleus);GO:0006351(transcription, DNA-templated);GO:0006355(regulation of transcription, DNA-templated);GO:0009651(response to salt stress);GO:0009723(response to ethylene);GO:0009733(response to auxin);GO:0009813(flavonoid biosynthetic process);GO:0045893(positive regulation of transcript…	ko04712(Circadian rhythm - plant)	-	P	4	185-205	N
miR858	TTCGTTGTCTGTTCGACCTTG	TRINITY_DN25134_c0_g1	PREDICTED: serine/threonine-protein phosphatase PP1 isoform X1 [Juglans regia]	GO:0004722(protein serine/threonine phosphatase activity);GO:0005575(cellular_component);GO:0006470(protein dephosphorylation);GO:0046872(metal ion binding)	ko03015(mRNA surveillance pathway)	-	PP1	4	342-362	N
miR858	TTCGTTGTCTGTTCGACCTTG	TRINITY_DN26275_c0_g1	unnamed protein product, partial [Vitis vinifera]	GO:0003677(DNA binding);GO:0003700(transcription factor activity, sequence-specific DNA binding);GO:0005634(nucleus);GO:0006351(transcription, DNA-templated);GO:0006355(regulation of transcription, DNA-templated);GO:0006952(defense response);GO:0009620(response to fungus);GO:0009651(response to salt stress);GO:0009723(response to ethylene);GO:0009737(response to abscisic acid);GO:0009753(response…	ko00190(Oxidative phosphorylation);ko00860(Porphyrin and chlorophyll metabolism)	-	MYB108	4	560-579	N
